# Supplementary material for: Evaluation of knowledge, attitudes, and clinical education of dental students about COVID-19 pandemic
Source: PeerJ. 2020 Jul 29;8:e9575. doi: 10.7717/peerj.9575 (PMC7395615; doi:10.7717/peerj.9575)
Supplement: Supplemental Information 1 — Includes all the demographic variables and answers to the questions. [file peerj-08-9575-s001.xlsx]

## Sheet: Form Yanıtları 1
what class are you in college	Gender	Have you been informed about Covid-19 in your faculty like lectures or seminars?	Do antibiotics benefit in the treatment of covid 19?	Can a mother diagnosed with covid 19 breastfeed her child?	Have you asked questions such as high fever, dry cough or travel abroad while taking an anamnesis from your patients in the last 3 months?	Sources about information about Covid-19	Individual measures taken by our students against Covid-19 in their daily lives	precautions taken by clinical students for themselves in internships	Precautions taken with the patient regarding Covid-19 while treating teeth	Did COVID 19 negatively affect your psychology?	Are you afraid of becoming infected with Covid-19 as a healthcare professional working at close range with the patient?	Are you afraid to infect any relatives or people around you in terms of Covid-19 because you are a healthcare worker working very close to the patient?	Would you hesitate to treat a patient who came to dental treatment after getting over and recovering from Covid-19 infection?	Which internship students are more concerned about COVID-19	Do you think that after your Covid-19 pandemic, you will be more careful in your standard measures regarding contamination in your patients?	With the Covid-19 outbreak, did you regret that you chose the dentistry profession?
4	Female	No	I don’t know	Yes	No	Websites or social media accounts of professional organizations, such as the Ministry of Health, Dental Association, and WHO	Use of cologne, wet wipes, and hand disinfectant	mask, gloves, safety glasses, face protective shield, frequent hand-washing , frequent hand antiseptic	asked whether the patient had symptoms, such as fever, cough, or shortness of breath, applied a rubber dam, avoided aerosols and processes that would create droplets, preferring to use hand tools instead of an aerator, cavitron, or micromotor, postponed appointments of potentially infected patients for at least 14 days	Yes	No	Yes	Undecided	periodontology	Yes	Undecided
4	Female	Yes	I don’t know	Yes	No	Physicians’ individual websites or social media accounts, Television and radio programs, Communication groups, such as Whatsapp or Line.	gloves, mask, frequent hand-washing , Use of cologne, wet wipes, and hand disinfectant , not entering public areas , not having physical contact (handshaking, kissing, etc.) , frequent ventilation of the environment , changing clothes upon arrival home ,taking a shower upon arrival home	frequent hand-washing , frequent hand antiseptic	asked whether the patient had symptoms, such as fever, cough, or shortness of breath, used a strong saliva absorber during the procedure, postponed appointments of potentially infected patients for at least 14 days	Yes	Yes	Yes	Yes	endodontics	Yes	Yes
4	Female	No	No	No	No	Websites or social media accounts of professional organizations, such as the Ministry of Health, Dental Association, and WHO	frequent hand-washing , Use of cologne, wet wipes, and hand disinfectant , not entering public areas , not having physical contact (handshaking, kissing, etc.) , frequent ventilation of the environment , changing clothes upon arrival home ,taking a shower upon arrival home	mask, gloves, face protective shield, bonnet, frequent hand-washing , frequent hand antiseptic	asked whether the patient had symptoms, such as fever, cough, or shortness of breath, rinsed the mouth with a mouthwash containing chlorhexidin, used a strong saliva absorber during the procedure, avoided aerosols and processes that would create droplets, postponed appointments of potentially infected patients for at least 14 days	Yes	Yes	Yes	Undecided	endodontics	Yes	No
4	Male	Yes	No	No	No	Websites or social media accounts of professional organizations, such as the Ministry of Health, Dental Association, and WHO, Published scientific articles	gloves, mask, frequent hand-washing , Use of cologne, wet wipes, and hand disinfectant , not entering public areas , not having physical contact (handshaking, kissing, etc.) , frequent ventilation of the environment	mask, gloves, face protective shield, frequent hand-washing , frequent hand antiseptic	avoided aerosols and processes that would create droplets	No	Yes	Yes	Undecided	endodontics	Yes	No
4	Female	No	No	I don’t know	Yes	Websites or social media accounts of professional organizations, such as the Ministry of Health, Dental Association, and WHO, Physicians’ individual websites or social media accounts, Social media accounts, like Instagram, Facebook, and Twitter, Television and radio programs, Communication groups, such as Whatsapp or Line.	gloves, mask, frequent hand-washing , Use of cologne, wet wipes, and hand disinfectant , not entering public areas , not having physical contact (handshaking, kissing, etc.) , frequent ventilation of the environment , changing clothes upon arrival home ,taking a shower upon arrival home	mask, gloves, safety glasses, face protective shield, bonnet, frequent hand-washing , frequent hand antiseptic	asked whether the patient had symptoms, such as fever, cough, or shortness of breath, applied a rubber dam, used a strong saliva absorber during the procedure, postponed appointments of potentially infected patients for at least 14 days	Yes	Yes	Yes	Yes	oral diagnosis and radiology	Yes	No
4	Male	No	No	I don’t know	No	Physicians’ individual websites or social media accounts, Social media accounts, like Instagram, Facebook, and Twitter, Television and radio programs, Communication groups, such as Whatsapp or Line.	gloves, mask, frequent hand-washing , changing clothes upon arrival home ,taking a shower upon arrival home	mask, gloves, safety glasses, face protective shield, bonnet, frequent hand-washing , frequent hand antiseptic	asked whether the patient had symptoms, such as fever, cough, or shortness of breath	Yes	Yes	Yes	No	restorative dentistry	No	No
4	Male	Yes	No	I don’t know	Yes	Physicians’ individual websites or social media accounts	not entering public areas , not having physical contact (handshaking, kissing, etc.) , frequent ventilation of the environment ,taking a shower upon arrival home	mask, gloves, face protective shield, bonnet, frequent hand-washing	asked whether the patient had symptoms, such as fever, cough, or shortness of breath, applied a rubber dam, postponed appointments of potentially infected patients for at least 14 days	Yes	Yes	Yes	Yes	endodontics	Yes	No
5	Female	No	I don’t know	I don’t know	No	Social media accounts, like Instagram, Facebook, and Twitter, Television and radio programs, Communication groups, such as Whatsapp or Line.	frequent hand-washing , Use of cologne, wet wipes, and hand disinfectant , frequent ventilation of the environment	mask, gloves, safety glasses, face protective shield, bonnet, frequent hand-washing , frequent hand antiseptic	asked whether the patient had symptoms, such as fever, cough, or shortness of breath, used a strong saliva absorber during the procedure, avoided aerosols and processes that would create droplets	Yes	Yes	Yes	Yes	endodontics	Undecided	Yes
5	Male	No	No	Yes	No	Websites or social media accounts of professional organizations, such as the Ministry of Health, Dental Association, and WHO, From information meetings held in institutions, Published scientific articles, Physicians’ individual websites or social media accounts, Social media accounts, like Instagram, Facebook, and Twitter, Television and radio programs, Communication groups, such as Whatsapp or L…	gloves, mask, frequent hand-washing , Use of cologne, wet wipes, and hand disinfectant , not entering public areas , not having physical contact (handshaking, kissing, etc.) , frequent ventilation of the environment , changing clothes upon arrival home ,taking a shower upon arrival home	mask, gloves, safety glasses, bonnet, frequent hand-washing , frequent hand antiseptic	avoided aerosols and processes that would create droplets	Yes	Yes	Yes	No	endodontics	Yes	No
4	Female	No	No	I don’t know	No	Websites or social media accounts of professional organizations, such as the Ministry of Health, Dental Association, and WHO, Published scientific articles, Social media accounts, like Instagram, Facebook, and Twitter, Television and radio programs	gloves, mask, frequent hand-washing , Use of cologne, wet wipes, and hand disinfectant , not entering public areas , not having physical contact (handshaking, kissing, etc.) , frequent ventilation of the environment , changing clothes upon arrival home	mask, gloves, face protective shield, frequent hand antiseptic	asked whether the patient had symptoms, such as fever, cough, or shortness of breath, used a strong saliva absorber during the procedure, avoided aerosols and processes that would create droplets, preferring to use hand tools instead of an aerator, cavitron, or micromotor, postponed appointments of potentially infected patients for at least 14 days	Yes	Yes	Yes	Yes	endodontics	Yes	No
4	Male	No	Yes	Yes	No	Websites or social media accounts of professional organizations, such as the Ministry of Health, Dental Association, and WHO, From information meetings held in institutions, Physicians’ individual websites or social media accounts, Social media accounts, like Instagram, Facebook, and Twitter, Television and radio programs, Communication groups, such as Whatsapp or Line.	frequent hand-washing , Use of cologne, wet wipes, and hand disinfectant , not entering public areas , not having physical contact (handshaking, kissing, etc.) , frequent ventilation of the environment	mask, gloves, safety glasses, face protective shield, frequent hand-washing , frequent hand antiseptic	used a strong saliva absorber during the procedure, avoided aerosols and processes that would create droplets	Yes	Yes	Undecided	Yes	oral diagnosis and radiology	Yes	No
4	Male	No	No	I don’t know	No	Websites or social media accounts of professional organizations, such as the Ministry of Health, Dental Association, and WHO, From information meetings held in institutions, Social media accounts, like Instagram, Facebook, and Twitter, Television and radio programs	mask, frequent hand-washing , Use of cologne, wet wipes, and hand disinfectant , not entering public areas , not having physical contact (handshaking, kissing, etc.) , frequent ventilation of the environment , changing clothes upon arrival home	mask, gloves, safety glasses, face protective shield, bonnet, Tek kullanımlık box önlüğü, frequent hand-washing , frequent hand antiseptic	asked whether the patient had symptoms, such as fever, cough, or shortness of breath, measured the patient’s fever, applied a rubber dam, rinsed the mouth with a mouthwash containing chlorhexidin, used a strong saliva absorber during the procedure, postponed appointments of potentially infected patients for at least 14 days	Undecided	Undecided	Yes	No	periodontology	Yes	No
4	Female	Yes	No	I don’t know	No	Physicians’ individual websites or social media accounts, Social media accounts, like Instagram, Facebook, and Twitter, Television and radio programs, Communication groups, such as Whatsapp or Line.	frequent hand-washing , Use of cologne, wet wipes, and hand disinfectant , not entering public areas , not having physical contact (handshaking, kissing, etc.) , frequent ventilation of the environment , changing clothes upon arrival home ,taking a shower upon arrival home	mask, gloves, face protective shield, frequent hand-washing , frequent hand antiseptic	asked whether the patient had symptoms, such as fever, cough, or shortness of breath, measured the patient’s fever, rinsed the mouth with a mouthwash containing chlorhexidin, used a strong saliva absorber during the procedure, avoided aerosols and processes that would create droplets, preferring to use hand tools instead of an aerator, cavitron, or micromotor, postponed appointments of potentiall…	Yes	Yes	Yes	Yes	endodontics	Yes	Undecided
5	Female	No	No	No	No	Websites or social media accounts of professional organizations, such as the Ministry of Health, Dental Association, and WHO,	frequent hand-washing , Use of cologne, wet wipes, and hand disinfectant , not entering public areas , not having physical contact (handshaking, kissing, etc.) , frequent ventilation of the environment , changing clothes upon arrival home	mask, gloves, face protective shield, frequent hand-washing	asked whether the patient had symptoms, such as fever, cough, or shortness of breath, applied a rubber dam, used a strong saliva absorber during the procedure, avoided aerosols and processes that would create droplets, preferring to use hand tools instead of an aerator, cavitron, or micromotor, postponed appointments of potentially infected patients for at least 14 days	Yes	Yes	Yes	Yes	prosthesis	Yes	Yes
4	Female	No	No	No	No	Websites or social media accounts of professional organizations, such as the Ministry of Health, Dental Association, and WHO, Social media accounts, like Instagram, Facebook, and Twitter, Television and radio programs	gloves, mask, frequent hand-washing , Use of cologne, wet wipes, and hand disinfectant , not entering public areas , not having physical contact (handshaking, kissing, etc.) , frequent ventilation of the environment , changing clothes upon arrival home ,taking a shower upon arrival home , Asansör düğmemizi ve dış kapı kolunu hipolu su ile silmek	mask, gloves, face protective shield, bonnet, frequent hand-washing , frequent hand antiseptic	none	Yes	Yes	Yes	Yes	endodontics	Yes	Undecided
5	Female	No	No	I don’t know	No	Websites or social media accounts of professional organizations, such as the Ministry of Health, Dental Association, and WHO	gloves, mask, frequent hand-washing , Use of cologne, wet wipes, and hand disinfectant , not entering public areas , not having physical contact (handshaking, kissing, etc.) , frequent ventilation of the environment , changing clothes upon arrival home ,taking a shower upon arrival home	mask, gloves, face protective shield, frequent hand-washing , frequent hand antiseptic	postponed appointments of potentially infected patients for at least 14 days	Yes	Yes	Yes	Yes	endodontics	Yes	No
5	Female	Yes	No	No	Yes	Websites or social media accounts of professional organizations, such as the Ministry of Health, Dental Association, and WHO, Published scientific articles, Physicians’ individual websites or social media accounts, Television and radio programs, Communication groups, such as Whatsapp or Line.	gloves, mask, frequent hand-washing , Use of cologne, wet wipes, and hand disinfectant , not entering public areas , not having physical contact (handshaking, kissing, etc.) , frequent ventilation of the environment , changing clothes upon arrival home	mask, gloves, face protective shield, frequent hand-washing , frequent hand antiseptic	asked whether the patient had symptoms, such as fever, cough, or shortness of breath, used a strong saliva absorber during the procedure	Yes	Yes	Yes	No	restorative dentistry	Yes	Undecided
4	Male	No	I don’t know	Yes	No	Published scientific articles, Physicians’ individual websites or social media accounts, Social media accounts, like Instagram, Facebook, and Twitter	frequent hand-washing , Use of cologne, wet wipes, and hand disinfectant , not entering public areas , not having physical contact (handshaking, kissing, etc.) , frequent ventilation of the environment	mask, face protective shield, Tek kullanımlık box önlüğü, frequent hand-washing , frequent hand antiseptic	applied a rubber dam, used a strong saliva absorber during the procedure, avoided aerosols and processes that would create droplets	No	Yes	Yes	Undecided	prosthesis	Yes	No
5	Female	Yes	No	No	No	Websites or social media accounts of professional organizations, such as the Ministry of Health, Dental Association, and WHO	frequent hand-washing , Use of cologne, wet wipes, and hand disinfectant , not entering public areas , not having physical contact (handshaking, kissing, etc.) , frequent ventilation of the environment , changing clothes upon arrival home	mask, gloves, face protective shield, frequent hand-washing , frequent hand antiseptic	asked whether the patient had symptoms, such as fever, cough, or shortness of breath, used a strong saliva absorber during the procedure, ,, avoided aerosols and processes that would create droplets, preferring to use hand tools instead of an aerator, cavitron, or micromotor, postponed appointments of potentially infected patients for at least 14 days	Yes	Yes	Yes	Yes	prosthesis	Yes	Yes
5	Male	No	No	No	No	Websites or social media accounts of professional organizations, such as the Ministry of Health, Dental Association, and WHO, From information meetings held in institutions, Published scientific articles, Television and radio programs	gloves, mask, frequent hand-washing , Use of cologne, wet wipes, and hand disinfectant , not entering public areas , not having physical contact (handshaking, kissing, etc.) , frequent ventilation of the environment , changing clothes upon arrival home ,taking a shower upon arrival home	mask, gloves, face protective shield, frequent hand-washing , frequent hand antiseptic	None	Yes	Yes	Yes	Yes	endodontics	Undecided	Yes
5	Male	Yes	No	Yes	No	Social media accounts, like Instagram, Facebook, and Twitter	gloves, mask, frequent hand-washing , Use of cologne, wet wipes, and hand disinfectant , not entering public areas , not having physical contact (handshaking, kissing, etc.) , frequent ventilation of the environment , changing clothes upon arrival home ,taking a shower upon arrival home	mask, gloves, frequent hand-washing , frequent hand antiseptic	asked whether the patient had symptoms, such as fever, cough, or shortness of breath, rinsed the mouth with a mouthwash containing chlorhexidin, avoided aerosols and processes that would create droplets, preferring to use hand tools instead of an aerator, cavitron, or micromotor	Yes	Yes	Yes	No	prosthesis	Yes	Yes
4	Female	Yes	No	No	No	Websites or social media accounts of professional organizations, such as the Ministry of Health, Dental Association, and WHO	frequent hand-washing , Use of cologne, wet wipes, and hand disinfectant , not entering public areas , not having physical contact (handshaking, kissing, etc.) , frequent ventilation of the environment , changing clothes upon arrival home ,taking a shower upon arrival home	mask, gloves, safety glasses, face protective shield, bonnet, Tek kullanımlık box önlüğü, frequent hand-washing , frequent hand antiseptic	asked whether the patient had symptoms, such as fever, cough, or shortness of breath, applied a rubber dam, rinsed the mouth with a mouthwash containing chlorhexidin, used a strong saliva absorber during the procedure, avoided aerosols and processes that would create droplets, postponed appointments of potentially infected patients for at least 14 days	Yes	Yes	Yes	Yes	prosthesis	Yes	No
4	Male	Yes	No	I don’t know	No	Websites or social media accounts of professional organizations, such as the Ministry of Health, Dental Association, and WHO, Physicians’ individual websites or social media accounts, Television and radio programs	frequent hand-washing , Use of cologne, wet wipes, and hand disinfectant , not entering public areas , not having physical contact (handshaking, kissing, etc.) , frequent ventilation of the environment	mask, gloves, face protective shield, frequent hand-washing , frequent hand antiseptic	used a strong saliva absorber during the procedure	No	Yes	Yes	Yes	prosthesis	Yes	Undecided
4	Female	No	No	No	No	Websites or social media accounts of professional organizations, such as the Ministry of Health, Dental Association, and WHO, From information meetings held in institutions, Published scientific articles	gloves, mask, frequent hand-washing , Use of cologne, wet wipes, and hand disinfectant , not entering public areas , not having physical contact (handshaking, kissing, etc.) , frequent ventilation of the environment , changing clothes upon arrival home ,taking a shower upon arrival home	mask, gloves, face protective shield, bonnet, frequent hand-washing , frequent hand antiseptic	asked whether the patient had symptoms, such as fever, cough, or shortness of breath, rinsed the mouth with a mouthwash containing chlorhexidin, used a strong saliva absorber during the procedure, ,, avoided aerosols and processes that would create droplets, preferring to use hand tools instead of an aerator, cavitron, or micromotor, postponed appointments of potentially infected patients for at …	Yes	Yes	Yes	Undecided	oral diagnosis and radiology	Yes	No
5	Female	Yes	No	I don’t know	No	Websites or social media accounts of professional organizations, such as the Ministry of Health, Dental Association, and WHO, From information meetings held in institutions, Physicians’ individual websites or social media accounts, Social media accounts, like Instagram, Facebook, and Twitter, Television and radio programs	frequent hand-washing , Use of cologne, wet wipes, and hand disinfectant , not entering public areas , not having physical contact (handshaking, kissing, etc.) , frequent ventilation of the environment , changing clothes upon arrival home ,taking a shower upon arrival home	mask, gloves, face protective shield, frequent hand-washing , frequent hand antiseptic	asked whether the patient had symptoms, such as fever, cough, or shortness of breath, postponed appointments of potentially infected patients for at least 14 days	Yes	Yes	Yes	Yes	prosthesis	Yes	No
5	Male	No	No	No	Yes	Websites or social media accounts of professional organizations, such as the Ministry of Health, Dental Association, and WHO, Physicians’ individual websites or social media accounts	frequent hand-washing , Use of cologne, wet wipes, and hand disinfectant , not entering public areas , not having physical contact (handshaking, kissing, etc.) , frequent ventilation of the environment	mask, gloves, safety glasses, face protective shield, bonnet, frequent hand-washing , frequent hand antiseptic	asked whether the patient had symptoms, such as fever, cough, or shortness of breath, used a strong saliva absorber during the procedure	Yes	Yes	Yes	Undecided	endodontics	Yes	Undecided
4	Male	No	No	Yes	Yes	Websites or social media accounts of professional organizations, such as the Ministry of Health, Dental Association, and WHO, From information meetings held in institutions, Published scientific articles, Physicians’ individual websites or social media accounts, Social media accounts, like Instagram, Facebook, and Twitter, Television and radio programs, Communication groups, such as Whatsapp or L…	gloves, mask, frequent hand-washing , Use of cologne, wet wipes, and hand disinfectant , not entering public areas , not having physical contact (handshaking, kissing, etc.) , frequent ventilation of the environment , changing clothes upon arrival home ,taking a shower upon arrival home	mask, gloves, safety glasses, face protective shield, bonnet, frequent hand-washing , frequent hand antiseptic	asked whether the patient had symptoms, such as fever, cough, or shortness of breath, measured the patient’s fever, applied a rubber dam, used a strong saliva absorber during the procedure, postponed appointments of potentially infected patients for at least 14 days	Yes	Yes	Yes	Yes	endodontics	Yes	No
5	Female	No	No	No	No	Websites or social media accounts of professional organizations, such as the Ministry of Health, Dental Association, and WHO, Physicians’ individual websites or social media accounts, Social media accounts, like Instagram, Facebook, and Twitter, Television and radio programs, Communication groups, such as Whatsapp or Line.	gloves, frequent hand-washing , Use of cologne, wet wipes, and hand disinfectant , not entering public areas , not having physical contact (handshaking, kissing, etc.) , frequent ventilation of the environment , changing clothes upon arrival home	mask, gloves, face protective shield, bonnet, frequent hand-washing , frequent hand antiseptic	asked whether the patient had symptoms, such as fever, cough, or shortness of breath, used a strong saliva absorber during the procedure, avoided aerosols and processes that would create droplets, preferring to use hand tools instead of an aerator, cavitron, or micromotor	Yes	Yes	Yes	No	endodontics	Yes	No
5	Female	Yes	No	I don’t know	No	Social media accounts, like Instagram, Facebook, and Twitter	frequent hand-washing , Use of cologne, wet wipes, and hand disinfectant , not entering public areas , not having physical contact (handshaking, kissing, etc.) , frequent ventilation of the environment , changing clothes upon arrival home ,taking a shower upon arrival home	mask, gloves, face protective shield, bonnet, Tek kullanımlık box önlüğü, frequent hand-washing , frequent hand antiseptic	asked whether the patient had symptoms, such as fever, cough, or shortness of breath, used a strong saliva absorber during the procedure	Yes	Yes	Yes	Yes	periodontology	Yes	No
5	Male	No	No	I don’t know	No	Websites or social media accounts of professional organizations, such as the Ministry of Health, Dental Association, and WHO, From information meetings held in institutions, Social media accounts, like Instagram, Facebook, and Twitter, Television and radio programs, Communication groups, such as Whatsapp or Line.	frequent hand-washing , Use of cologne, wet wipes, and hand disinfectant , not entering public areas , not having physical contact (handshaking, kissing, etc.) , frequent ventilation of the environment	mask, gloves, face protective shield, frequent hand-washing , frequent hand antiseptic	None	Yes	Yes	Yes	No	endodontics	Yes	No
5	Male	Yes	No	No	No	Websites or social media accounts of professional organizations, such as the Ministry of Health, Dental Association, and WHO	gloves, mask, frequent hand-washing , Use of cologne, wet wipes, and hand disinfectant , not entering public areas , not having physical contact (handshaking, kissing, etc.) , frequent ventilation of the environment , changing clothes upon arrival home ,taking a shower upon arrival home	mask, gloves, safety glasses, face protective shield, bonnet, frequent hand-washing , frequent hand antiseptic	asked whether the patient had symptoms, such as fever, cough, or shortness of breath, avoided aerosols and processes that would create droplets	Yes	Yes	Yes	Yes	restorative dentistry	Yes	No
4	Female	Yes	No	I don’t know	No	Television and radio programs	gloves, mask, frequent hand-washing , Use of cologne, wet wipes, and hand disinfectant , not entering public areas , not having physical contact (handshaking, kissing, etc.) , frequent ventilation of the environment , changing clothes upon arrival home ,taking a shower upon arrival home	mask, gloves, safety glasses, face protective shield, bonnet, frequent hand-washing , frequent hand antiseptic	asked whether the patient had symptoms, such as fever, cough, or shortness of breath, measured the patient’s fever, used a strong saliva absorber during the procedure, avoided aerosols and processes that would create droplets, postponed appointments of potentially infected patients for at least 14 days	Yes	Yes	Yes	Undecided	prosthesis	Yes	No
4	Female	No	No	I don’t know	No	Physicians’ individual websites or social media accounts, Social media accounts, like Instagram, Facebook, and Twitter, Television and radio programs	gloves, mask, frequent hand-washing , Use of cologne, wet wipes, and hand disinfectant , not entering public areas , not having physical contact (handshaking, kissing, etc.) , changing clothes upon arrival home	mask, gloves, face protective shield, frequent hand-washing , frequent hand antiseptic	postponed appointments of potentially infected patients for at least 14 days	Yes	Yes	Yes	Yes	periodontology	Yes	No
5	Male	No	No	No	No	Websites or social media accounts of professional organizations, such as the Ministry of Health, Dental Association, and WHO, Published scientific articles, Television and radio programs	frequent hand-washing , not entering public areas , not having physical contact (handshaking, kissing, etc.)	None	None	Yes	No	Yes	Yes	endodontics	No	No
5	Female	No	No	Yes	No	Websites or social media accounts of professional organizations, such as the Ministry of Health, Dental Association, and WHO	frequent hand-washing , Use of cologne, wet wipes, and hand disinfectant , not entering public areas , not having physical contact (handshaking, kissing, etc.) , frequent ventilation of the environment , changing clothes upon arrival home	mask, gloves, face protective shield, frequent hand-washing , frequent hand antiseptic	asked whether the patient had symptoms, such as fever, cough, or shortness of breath	Yes	Yes	Yes	Undecided	periodontology	Yes	No
5	Female	Yes	No	I don’t know	No	Websites or social media accounts of professional organizations, such as the Ministry of Health, Dental Association, and WHO, From information meetings held in institutions, Published scientific articles, Physicians’ individual websites or social media accounts, Social media accounts, like Instagram, Facebook, and Twitter, Television and radio programs, Communication groups, such as Whatsapp or L…	gloves, mask, frequent hand-washing , Use of cologne, wet wipes, and hand disinfectant , not entering public areas , not having physical contact (handshaking, kissing, etc.) , frequent ventilation of the environment , changing clothes upon arrival home ,taking a shower upon arrival home	mask, gloves, safety glasses, face protective shield, bonnet, frequent hand-washing , frequent hand antiseptic	asked whether the patient had symptoms, such as fever, cough, or shortness of breath, preferring to use hand tools instead of an aerator, cavitron, or micromotor, postponed appointments of potentially infected patients for at least 14 days	Yes	Yes	Yes	Yes	endodontics	Yes	Undecided
4	Male	No	No	No	No	Websites or social media accounts of professional organizations, such as the Ministry of Health, Dental Association, and WHO, Television and radio programs	frequent hand-washing , Use of cologne, wet wipes, and hand disinfectant , not entering public areas , not having physical contact (handshaking, kissing, etc.) , frequent ventilation of the environment , changing clothes upon arrival home ,taking a shower upon arrival home	gloves, face protective shield, bonnet, frequent hand-washing , frequent hand antiseptic	avoided aerosols and processes that would create droplets	Yes	Yes	Yes	No	prosthesis	Yes	No
5	Female	No	No	Yes	No	Websites or social media accounts of professional organizations, such as the Ministry of Health, Dental Association, and WHO, Social media accounts, like Instagram, Facebook, and Twitter	frequent hand-washing , Use of cologne, wet wipes, and hand disinfectant , not entering public areas , not having physical contact (handshaking, kissing, etc.) , frequent ventilation of the environment	mask, gloves, face protective shield, frequent hand-washing , frequent hand antiseptic	None	Yes	Yes	Yes	Yes	endodontics	Yes	No
4	Female	Yes	No	I don’t know	No	Websites or social media accounts of professional organizations, such as the Ministry of Health, Dental Association, and WHO, Television and radio programs	frequent hand-washing , Use of cologne, wet wipes, and hand disinfectant , not entering public areas , not having physical contact (handshaking, kissing, etc.) , changing clothes upon arrival home	mask, gloves, bonnet, frequent hand-washing , frequent hand antiseptic	asked whether the patient had symptoms, such as fever, cough, or shortness of breath, ,, ,, used a strong saliva absorber during the procedure	Yes	Yes	Yes	Yes	endodontics	Undecided	Undecided
4	Male	No	No	No	Yes	Websites or social media accounts of professional organizations, such as the Ministry of Health, Dental Association, and WHO, Social media accounts, like Instagram, Facebook, and Twitter, Television and radio programs	frequent hand-washing , Use of cologne, wet wipes, and hand disinfectant , not entering public areas , not having physical contact (handshaking, kissing, etc.) , frequent ventilation of the environment ,taking a shower upon arrival home	mask, gloves, safety glasses, face protective shield, bonnet, frequent hand-washing , frequent hand antiseptic	asked whether the patient had symptoms, such as fever, cough, or shortness of breath, used a strong saliva absorber during the procedure	Yes	No	Yes	No	periodontology	Yes	No
5	Female	No	No	No	No	Websites or social media accounts of professional organizations, such as the Ministry of Health, Dental Association, and WHO, Social media accounts, like Instagram, Facebook, and Twitter	frequent hand-washing , Use of cologne, wet wipes, and hand disinfectant , not entering public areas , not having physical contact (handshaking, kissing, etc.) , frequent ventilation of the environment	mask, gloves, safety glasses, frequent hand-washing , frequent hand antiseptic	None	Yes	Yes	Yes	No	periodontology	Yes	Undecided
4	Male	Yes	No	I don’t know	No	From information meetings held in institutions	mask, frequent hand-washing , Use of cologne, wet wipes, and hand disinfectant , not entering public areas , not having physical contact (handshaking, kissing, etc.) , frequent ventilation of the environment , changing clothes upon arrival home	mask, gloves, safety glasses, face protective shield, bonnet, frequent hand-washing , frequent hand antiseptic	None	Yes	Yes	Yes	Yes	oral diagnosis and radiology	Yes	No
5	Female	No	No	No	No	Social media accounts, like Instagram, Facebook, and Twitter	frequent hand-washing , Use of cologne, wet wipes, and hand disinfectant , not entering public areas , not having physical contact (handshaking, kissing, etc.)	gloves, face protective shield, bonnet	asked whether the patient had symptoms, such as fever, cough, or shortness of breath, preferring to use hand tools instead of an aerator, cavitron, or micromotor, postponed appointments of potentially infected patients for at least 14 days	Yes	Yes	Yes	Yes	periodontology	Yes	No
5	Female	No	I don’t know	I don’t know	No	Social media accounts, like Instagram, Facebook, and Twitter, Television and radio programs	Use of cologne, wet wipes, and hand disinfectant , not entering public areas , not having physical contact (handshaking, kissing, etc.) , frequent ventilation of the environment , changing clothes upon arrival home	frequent hand-washing	asked whether the patient had symptoms, such as fever, cough, or shortness of breath	Yes	Yes	Yes	No	endodontics	Yes	Yes
5	Female	No	No	Yes	Yes	Websites or social media accounts of professional organizations, such as the Ministry of Health, Dental Association, and WHO, From information meetings held in institutions, Social media accounts, like Instagram, Facebook, and Twitter, Television and radio programs	frequent hand-washing , Use of cologne, wet wipes, and hand disinfectant , not entering public areas , not having physical contact (handshaking, kissing, etc.) , frequent ventilation of the environment , changing clothes upon arrival home	mask, gloves, safety glasses, face protective shield, frequent hand antiseptic	asked whether the patient had symptoms, such as fever, cough, or shortness of breath, rinsed the mouth with a mouthwash containing chlorhexidin, avoided aerosols and processes that would create droplets, postponed appointments of potentially infected patients for at least 14 days	Yes	Yes	Yes	Yes	restorative dentistry	Yes	No
5	Male	No	No	I don’t know	No	Websites or social media accounts of professional organizations, such as the Ministry of Health, Dental Association, and WHO, Social media accounts, like Instagram, Facebook, and Twitter	frequent hand-washing , Use of cologne, wet wipes, and hand disinfectant , not entering public areas , frequent ventilation of the environment	mask, gloves, frequent hand-washing , frequent hand antiseptic	None	Undecided	Yes	Yes	Yes	endodontics	Yes	No
4	Male	No	No	No	No	Websites or social media accounts of professional organizations, such as the Ministry of Health, Dental Association, and WHO, From information meetings held in institutions, Social media accounts, like Instagram, Facebook, and Twitter, Television and radio programs	frequent hand-washing , Use of cologne, wet wipes, and hand disinfectant , not entering public areas , not having physical contact (handshaking, kissing, etc.) , frequent ventilation of the environment	mask, gloves, safety glasses, face protective shield, bonnet, frequent hand-washing , frequent hand antiseptic	used a strong saliva absorber during the procedure	Yes	Yes	Yes	Yes	periodontology	Yes	No
4	Female	No	No	Yes	No	Social media accounts, like Instagram, Facebook, and Twitter	gloves, mask, frequent hand-washing , not entering public areas , not having physical contact (handshaking, kissing, etc.) , frequent ventilation of the environment , changing clothes upon arrival home	mask, gloves, face protective shield, bonnet, frequent hand-washing , frequent hand antiseptic	None	Yes	Yes	Yes	Yes	prosthesis	Yes	Yes
4	Female	No	No	No	No	From information meetings held in institutions, Physicians’ individual websites or social media accounts, Social media accounts, like Instagram, Facebook, and Twitter, Television and radio programs, Communication groups, such as Whatsapp or Line.	gloves, mask, frequent hand-washing , Use of cologne, wet wipes, and hand disinfectant , not entering public areas , not having physical contact (handshaking, kissing, etc.) , frequent ventilation of the environment	mask, gloves, safety glasses, face protective shield, frequent hand-washing , frequent hand antiseptic	asked whether the patient had symptoms, such as fever, cough, or shortness of breath, measured the patient’s fever, rinsed the mouth with a mouthwash containing chlorhexidin, avoided aerosols and processes that would create droplets	Yes	Yes	Yes	Yes	endodontics	Undecided	Undecided
4	Female	Yes	No	No	No	Published scientific articles	gloves, mask, frequent hand-washing , Use of cologne, wet wipes, and hand disinfectant , not entering public areas , not having physical contact (handshaking, kissing, etc.) , frequent ventilation of the environment , changing clothes upon arrival home	mask, gloves, face protective shield, bonnet, frequent hand-washing , frequent hand antiseptic	None	Yes	No	Yes	No	prosthesis	Yes	No
4	Female	No	No	I don’t know	No	Social media accounts, like Instagram, Facebook, and Twitter, Television and radio programs, Communication groups, such as Whatsapp or Line.	frequent hand-washing , Use of cologne, wet wipes, and hand disinfectant , not entering public areas , not having physical contact (handshaking, kissing, etc.) , frequent ventilation of the environment	mask, gloves, safety glasses, face protective shield, frequent hand-washing , frequent hand antiseptic	asked whether the patient had symptoms, such as fever, cough, or shortness of breath, used a strong saliva absorber during the procedure, avoided aerosols and processes that would create droplets	Yes	Yes	Yes	Undecided	endodontics	Yes	No
4	Female	No	No	No	Yes	Websites or social media accounts of professional organizations, such as the Ministry of Health, Dental Association, and WHO, From information meetings held in institutions, Physicians’ individual websites or social media accounts, Social media accounts, like Instagram, Facebook, and Twitter, Television and radio programs	frequent hand-washing , Use of cologne, wet wipes, and hand disinfectant , not entering public areas , not having physical contact (handshaking, kissing, etc.) , changing clothes upon arrival home	mask, gloves, face protective shield, bonnet, frequent hand-washing , frequent hand antiseptic	asked whether the patient had symptoms, such as fever, cough, or shortness of breath, avoided aerosols and processes that would create droplets, postponed appointments of potentially infected patients for at least 14 days	Yes	Yes	Yes	No	endodontics	Yes	No
5	Female	No	No	No	No	Websites or social media accounts of professional organizations, such as the Ministry of Health, Dental Association, and WHO, Physicians’ individual websites or social media accounts, Social media accounts, like Instagram, Facebook, and Twitter, Television and radio programs	gloves, mask, frequent hand-washing , Use of cologne, wet wipes, and hand disinfectant , not entering public areas , not having physical contact (handshaking, kissing, etc.) , frequent ventilation of the environment , changing clothes upon arrival home ,taking a shower upon arrival home	mask, gloves, face protective shield, bonnet	asked whether the patient had symptoms, such as fever, cough, or shortness of breath, applied a rubber dam, used a strong saliva absorber during the procedure	Yes	Yes	Yes	Yes	endodontics	Yes	No
4	Female	Yes	No	No	No	Physicians’ individual websites or social media accounts	not having physical contact (handshaking, kissing, etc.)	frequent hand-washing	asked whether the patient had symptoms, such as fever, cough, or shortness of breath, rinsed the mouth with a mouthwash containing chlorhexidin, postponed appointments of potentially infected patients for at least 14 days	Yes	Yes	Yes	No	restorative dentistry	Yes	No
5	Female	No	No	No	No	Physicians’ individual websites or social media accounts	frequent hand-washing , Use of cologne, wet wipes, and hand disinfectant , not having physical contact (handshaking, kissing, etc.) , frequent ventilation of the environment , changing clothes upon arrival home	mask, gloves, safety glasses, face protective shield, frequent hand-washing	asked whether the patient had symptoms, such as fever, cough, or shortness of breath, avoided aerosols and processes that would create droplets, postponed appointments of potentially infected patients for at least 14 days	Yes	Yes	Yes	Yes	prosthesis	Yes	No
5	Female	Yes	No	I don’t know	No	Websites or social media accounts of professional organizations, such as the Ministry of Health, Dental Association, and WHO, Social media accounts, like Instagram, Facebook, and Twitter, Communication groups, such as Whatsapp or Line.	mask, frequent hand-washing , not entering public areas , not having physical contact (handshaking, kissing, etc.) , changing clothes upon arrival home	mask, gloves, frequent hand-washing , frequent hand antiseptic	asked whether the patient had symptoms, such as fever, cough, or shortness of breath, applied a rubber dam, used a strong saliva absorber during the procedure, avoided aerosols and processes that would create droplets, preferring to use hand tools instead of an aerator, cavitron, or micromotor	Yes	Yes	Yes	No	endodontics	Yes	No
5	Female	No	No	No	No	Websites or social media accounts of professional organizations, such as the Ministry of Health, Dental Association, and WHO, Fahrettin Kocanın Twitter hesabını takip ediyorum her saat başı.	frequent hand-washing , Use of cologne, wet wipes, and hand disinfectant , not entering public areas , not having physical contact (handshaking, kissing, etc.) , frequent ventilation of the environment , changing clothes upon arrival home	mask, gloves, face protective shield, frequent hand-washing	asked whether the patient had symptoms, such as fever, cough, or shortness of breath, applied a rubber dam, used a strong saliva absorber during the procedure, avoided aerosols and processes that would create droplets, preferring to use hand tools instead of an aerator, cavitron, or micromotor, postponed appointments of potentially infected patients for at least 14 days	Yes	Yes	Yes	Yes	prosthesis	Yes	Yes
4	Female	No	No	Yes	No	Websites or social media accounts of professional organizations, such as the Ministry of Health, Dental Association, and WHO, Published scientific articles, Physicians’ individual websites or social media accounts, Social media accounts, like Instagram, Facebook, and Twitter, Television and radio programs	gloves, mask, frequent hand-washing , Use of cologne, wet wipes, and hand disinfectant , not entering public areas , not having physical contact (handshaking, kissing, etc.) , frequent ventilation of the environment , changing clothes upon arrival home ,taking a shower upon arrival home	mask, gloves, safety glasses, face protective shield, bonnet, frequent hand-washing , frequent hand antiseptic	asked whether the patient had symptoms, such as fever, cough, or shortness of breath, applied a rubber dam, rinsed the mouth with a mouthwash containing chlorhexidin, used a strong saliva absorber during the procedure, avoided aerosols and processes that would create droplets, postponed appointments of potentially infected patients for at least 14 days	Yes	No	Yes	No	restorative dentistry	Yes	No
5	Female	No	No	No	Yes	Websites or social media accounts of professional organizations, such as the Ministry of Health, Dental Association, and WHO, Physicians’ individual websites or social media accounts, Social media accounts, like Instagram, Facebook, and Twitter, Television and radio programs	frequent hand-washing , Use of cologne, wet wipes, and hand disinfectant , not entering public areas , not having physical contact (handshaking, kissing, etc.) , frequent ventilation of the environment	mask, gloves, face protective shield, bonnet, frequent hand-washing , frequent hand antiseptic	asked whether the patient had symptoms, such as fever, cough, or shortness of breath	Yes	Yes	Yes	Undecided	periodontology	Yes	No
4	Male	Yes	No	I don’t know	No	Websites or social media accounts of professional organizations, such as the Ministry of Health, Dental Association, and WHO, Television and radio programs	frequent hand-washing , not entering public areas , not having physical contact (handshaking, kissing, etc.)	mask, gloves, safety glasses, bonnet, frequent hand-washing , frequent hand antiseptic	asked whether the patient had symptoms, such as fever, cough, or shortness of breath, postponed appointments of potentially infected patients for at least 14 days	Yes	Yes	Yes	Yes	endodontics	Yes	No
4	Male	No	Yes	No	No	Websites or social media accounts of professional organizations, such as the Ministry of Health, Dental Association, and WHO, From information meetings held in institutions, Published scientific articles, Television and radio programs	frequent hand-washing , Use of cologne, wet wipes, and hand disinfectant , not entering public areas , not having physical contact (handshaking, kissing, etc.) , frequent ventilation of the environment	mask, gloves, safety glasses, face protective shield, bonnet, frequent hand-washing , frequent hand antiseptic	asked whether the patient had symptoms, such as fever, cough, or shortness of breath, measured the patient’s fever, applied a rubber dam, rinsed the mouth with a mouthwash containing chlorhexidin, used a strong saliva absorber during the procedure, avoided aerosols and processes that would create droplets, preferring to use hand tools instead of an aerator, cavitron, or micromotor	Yes	Yes	Yes	Yes	prosthesis	Yes	No
5	Male	No	Yes	No	Yes	Websites or social media accounts of professional organizations, such as the Ministry of Health, Dental Association, and WHO, Physicians’ individual websites or social media accounts	frequent hand-washing , Use of cologne, wet wipes, and hand disinfectant , not entering public areas , not having physical contact (handshaking, kissing, etc.) , frequent ventilation of the environment , changing clothes upon arrival home ,taking a shower upon arrival home	mask, gloves, face protective shield, bonnet, Tek kullanımlık box önlüğü, frequent hand-washing , frequent hand antiseptic	asked whether the patient had symptoms, such as fever, cough, or shortness of breath, avoided aerosols and processes that would create droplets, postponed appointments of potentially infected patients for at least 14 days	Yes	Yes	Yes	Yes	prosthesis	Undecided	No
5	Male	No	No	Yes	Yes	Physicians’ individual websites or social media accounts	gloves, mask, frequent hand-washing	mask, gloves, face protective shield, bonnet	asked whether the patient had symptoms, such as fever, cough, or shortness of breath	Yes	Yes	Yes	No	endodontics	Undecided	Yes
4	Male	Yes	No	I don’t know	No	Websites or social media accounts of professional organizations, such as the Ministry of Health, Dental Association, and WHO, From information meetings held in institutions, Published scientific articles, Physicians’ individual websites or social media accounts, Social media accounts, like Instagram, Facebook, and Twitter, Television and radio programs	frequent hand-washing , not entering public areas , not having physical contact (handshaking, kissing, etc.) , frequent ventilation of the environment	mask, gloves, face protective shield, frequent hand-washing , frequent hand antiseptic	None	Yes	Yes	Yes	Yes	endodontics	Yes	Undecided
4	Male	Yes	No	I don’t know	No	Websites or social media accounts of professional organizations, such as the Ministry of Health, Dental Association, and WHO, From information meetings held in institutions, Social media accounts, like Instagram, Facebook, and Twitter, Television and radio programs, Communication groups, such as Whatsapp or Line.	mask, frequent hand-washing , Use of cologne, wet wipes, and hand disinfectant , not entering public areas , not having physical contact (handshaking, kissing, etc.) , frequent ventilation of the environment , changing clothes upon arrival home	mask, gloves, safety glasses, face protective shield, frequent hand-washing , frequent hand antiseptic	asked whether the patient had symptoms, such as fever, cough, or shortness of breath, used a strong saliva absorber during the procedure, preferring to use hand tools instead of an aerator, cavitron, or micromotor	Yes	Yes	Yes	Yes	oral diagnosis and radiology	Yes	No
4	Female	Yes	No	I don’t know	No	Websites or social media accounts of professional organizations, such as the Ministry of Health, Dental Association, and WHO, From information meetings held in institutions, Physicians’ individual websites or social media accounts, Social media accounts, like Instagram, Facebook, and Twitter, Television and radio programs, Communication groups, such as Whatsapp or Line.	mask, frequent hand-washing , Use of cologne, wet wipes, and hand disinfectant , not entering public areas , not having physical contact (handshaking, kissing, etc.) , frequent ventilation of the environment , changing clothes upon arrival home	mask, gloves, face protective shield, frequent hand-washing , frequent hand antiseptic	used a strong saliva absorber during the procedure	Yes	Yes	Yes	Yes	prosthesis	Yes	No
4	Female	Yes	No	No	No	Websites or social media accounts of professional organizations, such as the Ministry of Health, Dental Association, and WHO, Social media accounts, like Instagram, Facebook, and Twitter, Television and radio programs	frequent hand-washing , Use of cologne, wet wipes, and hand disinfectant , not entering public areas , not having physical contact (handshaking, kissing, etc.) , frequent ventilation of the environment	mask, gloves, face protective shield, frequent hand-washing , frequent hand antiseptic	asked whether the patient had symptoms, such as fever, cough, or shortness of breath, avoided aerosols and processes that would create droplets, preferring to use hand tools instead of an aerator, cavitron, or micromotor, postponed appointments of potentially infected patients for at least 14 days	Yes	Undecided	Yes	Yes	endodontics	Yes	No
4	Female	No	No	Yes	No	Websites or social media accounts of professional organizations, such as the Ministry of Health, Dental Association, and WHO, Physicians’ individual websites or social media accounts, Social media accounts, like Instagram, Facebook, and Twitter, Television and radio programs, Communication groups, such as Whatsapp or Line.	gloves, mask, frequent hand-washing , Use of cologne, wet wipes, and hand disinfectant , not entering public areas , not having physical contact (handshaking, kissing, etc.) , frequent ventilation of the environment , changing clothes upon arrival home ,taking a shower upon arrival home	mask, gloves, face protective shield, frequent hand-washing , frequent hand antiseptic	asked whether the patient had symptoms, such as fever, cough, or shortness of breath	Yes	Yes	Yes	Yes	oral and maxillofacial surgery	Yes	No
5	Female	No	No	No	No	Websites or social media accounts of professional organizations, such as the Ministry of Health, Dental Association, and WHO, Published scientific articles, Physicians’ individual websites or social media accounts, Social media accounts, like Instagram, Facebook, and Twitter, Television and radio programs, Communication groups, such as Whatsapp or Line.	gloves, mask, frequent hand-washing , Use of cologne, wet wipes, and hand disinfectant , not entering public areas , not having physical contact (handshaking, kissing, etc.) , frequent ventilation of the environment	mask, gloves, safety glasses, frequent hand-washing , frequent hand antiseptic	used a strong saliva absorber during the procedure	Yes	Yes	Yes	No	endodontics	Yes	No
4	Female	No	No	Yes	No	Websites or social media accounts of professional organizations, such as the Ministry of Health, Dental Association, and WHO	frequent hand-washing , Use of cologne, wet wipes, and hand disinfectant , not entering public areas , not having physical contact (handshaking, kissing, etc.)	frequent hand antiseptic	None	No	Yes	Yes	Undecided	prosthesis	Yes	No
4	Male	Yes	I don’t know	No	No	Websites or social media accounts of professional organizations, such as the Ministry of Health, Dental Association, and WHO, Physicians’ individual websites or social media accounts, Television and radio programs	gloves, mask, frequent hand-washing , Use of cologne, wet wipes, and hand disinfectant , not entering public areas , not having physical contact (handshaking, kissing, etc.) , frequent ventilation of the environment , changing clothes upon arrival home	mask, gloves, safety glasses, face protective shield, bonnet, frequent hand-washing , frequent hand antiseptic	asked whether the patient had symptoms, such as fever, cough, or shortness of breath, applied a rubber dam, used a strong saliva absorber during the procedure	Undecided	Yes	Yes	No	oral and maxillofacial surgery	Yes	No
4	Female	No	No	Yes	No	Published scientific articles, Physicians’ individual websites or social media accounts	frequent hand-washing , Use of cologne, wet wipes, and hand disinfectant , not entering public areas , not having physical contact (handshaking, kissing, etc.) , frequent ventilation of the environment , changing clothes upon arrival home ,taking a shower upon arrival home	mask, gloves, face protective shield, Tek kullanımlık box önlüğü, frequent hand-washing , frequent hand antiseptic	asked whether the patient had symptoms, such as fever, cough, or shortness of breath, measured the patient’s fever, used a strong saliva absorber during the procedure, ,, avoided aerosols and processes that would create droplets, preferring to use hand tools instead of an aerator, cavitron, or micromotor, postponed appointments of potentially infected patients for at least 14 days	No	Yes	Yes	No	oral and maxillofacial surgery	Yes	No
4	Male	Yes	No	No	No	Websites or social media accounts of professional organizations, such as the Ministry of Health, Dental Association, and WHO, Physicians’ individual websites or social media accounts, Social media accounts, like Instagram, Facebook, and Twitter, Television and radio programs, Communication groups, such as Whatsapp or Line.	gloves, frequent hand-washing , Use of cologne, wet wipes, and hand disinfectant , not entering public areas , not having physical contact (handshaking, kissing, etc.)	mask, gloves, face protective shield, Tek kullanımlık box önlüğü, frequent hand-washing , frequent hand antiseptic	asked whether the patient had symptoms, such as fever, cough, or shortness of breath, used a strong saliva absorber during the procedure, avoided aerosols and processes that would create droplets, postponed appointments of potentially infected patients for at least 14 days	Yes	Yes	Yes	Yes	endodontics	Yes	No
3	Female	No	No	No	Yes	Websites or social media accounts of professional organizations, such as the Ministry of Health, Dental Association, and WHO, Social media accounts, like Instagram, Facebook, and Twitter	gloves, mask, frequent hand-washing , Use of cologne, wet wipes, and hand disinfectant , not entering public areas , not having physical contact (handshaking, kissing, etc.) , frequent ventilation of the environment , changing clothes upon arrival home ,taking a shower upon arrival home	None	asked whether the patient had symptoms, such as fever, cough, or shortness of breath, measured the patient’s fever, applied a rubber dam, rinsed the mouth with a mouthwash containing chlorhexidin, ,, ,, preferring to use hand tools instead of an aerator, cavitron, or micromotor	Yes	Yes	Yes	Yes	periodontology	Yes	No
4	Female	Yes	No	I don’t know	No	Websites or social media accounts of professional organizations, such as the Ministry of Health, Dental Association, and WHO	frequent hand-washing , not entering public areas , not having physical contact (handshaking, kissing, etc.) , frequent ventilation of the environment	mask, gloves, frequent hand-washing , frequent hand antiseptic	asked whether the patient had symptoms, such as fever, cough, or shortness of breath, measured the patient’s fever, rinsed the mouth with a mouthwash containing chlorhexidin, used a strong saliva absorber during the procedure, avoided aerosols and processes that would create droplets, preferring to use hand tools instead of an aerator, cavitron, or micromotor, postponed appointments of potentiall…	Undecided	Yes	Yes	No	endodontics	Yes	No
3	Female	No	I don’t know	No	No	Websites or social media accounts of professional organizations, such as the Ministry of Health, Dental Association, and WHO, Published scientific articles, Social media accounts, like Instagram, Facebook, and Twitter, Television and radio programs, Communication groups, such as Whatsapp or Line.	gloves, mask, frequent hand-washing , Use of cologne, wet wipes, and hand disinfectant , not entering public areas , not having physical contact (handshaking, kissing, etc.) , frequent ventilation of the environment , changing clothes upon arrival home ,taking a shower upon arrival home	mask, gloves, frequent hand-washing , frequent hand antiseptic	asked whether the patient had symptoms, such as fever, cough, or shortness of breath, measured the patient’s fever, avoided aerosols and processes that would create droplets, preferring to use hand tools instead of an aerator, cavitron, or micromotor, postponed appointments of potentially infected patients for at least 14 days	Yes	Yes	Yes	Yes	periodontology	Yes	No
5	Female	No	I don’t know	No	No	Websites or social media accounts of professional organizations, such as the Ministry of Health, Dental Association, and WHO, Social media accounts, like Instagram, Facebook, and Twitter, Television and radio programs	mask, frequent hand-washing , Use of cologne, wet wipes, and hand disinfectant , not entering public areas , not having physical contact (handshaking, kissing, etc.) , frequent ventilation of the environment , changing clothes upon arrival home	mask, gloves, frequent hand-washing , frequent hand antiseptic	None	Yes	Yes	Yes	Yes	periodontology	Yes	No
3	Male	Yes	No	I don’t know	Yes	Websites or social media accounts of professional organizations, such as the Ministry of Health, Dental Association, and WHO	gloves, mask, frequent hand-washing , Use of cologne, wet wipes, and hand disinfectant , not entering public areas , not having physical contact (handshaking, kissing, etc.) , frequent ventilation of the environment , changing clothes upon arrival home ,taking a shower upon arrival home	mask, gloves, frequent hand-washing , frequent hand antiseptic	asked whether the patient had symptoms, such as fever, cough, or shortness of breath, measured the patient’s fever, used a strong saliva absorber during the procedure	Undecided	Yes	Yes	Yes	prosthesis	Yes	No
3	Female	Yes	No	No	No	Physicians’ individual websites or social media accounts, Social media accounts, like Instagram, Facebook, and Twitter, Television and radio programs, Communication groups, such as Whatsapp or Line.	gloves, mask, frequent hand-washing , Use of cologne, wet wipes, and hand disinfectant , not entering public areas , not having physical contact (handshaking, kissing, etc.) , frequent ventilation of the environment , changing clothes upon arrival home	mask, gloves, face protective shield	asked whether the patient had symptoms, such as fever, cough, or shortness of breath, applied a rubber dam, used a strong saliva absorber during the procedure, avoided aerosols and processes that would create droplets, preferring to use hand tools instead of an aerator, cavitron, or micromotor, postponed appointments of potentially infected patients for at least 14 days	Yes	Yes	Yes	Yes	restorative dentistry	Yes	Yes
4	Female	No	No	I don’t know	No	Websites or social media accounts of professional organizations, such as the Ministry of Health, Dental Association, and WHO, From information meetings held in institutions, Published scientific articles, Physicians’ individual websites or social media accounts, Social media accounts, like Instagram, Facebook, and Twitter, Television and radio programs	gloves, mask, frequent hand-washing , Use of cologne, wet wipes, and hand disinfectant , not entering public areas , not having physical contact (handshaking, kissing, etc.) , frequent ventilation of the environment , changing clothes upon arrival home ,taking a shower upon arrival home	mask, gloves, safety glasses, face protective shield, bonnet, frequent hand-washing , frequent hand antiseptic	asked whether the patient had symptoms, such as fever, cough, or shortness of breath, avoided aerosols and processes that would create droplets, preferring to use hand tools instead of an aerator, cavitron, or micromotor, postponed appointments of potentially infected patients for at least 14 days	Yes	Yes	Yes	Yes	endodontics	Yes	Undecided
4	Female	No	Yes	I don’t know	No	Websites or social media accounts of professional organizations, such as the Ministry of Health, Dental Association, and WHO, Published scientific articles, Social media accounts, like Instagram, Facebook, and Twitter	gloves, mask, frequent hand-washing , not entering public areas , not having physical contact (handshaking, kissing, etc.) , frequent ventilation of the environment , changing clothes upon arrival home	mask, gloves, face protective shield, bonnet, frequent hand-washing , frequent hand antiseptic	asked whether the patient had symptoms, such as fever, cough, or shortness of breath, avoided aerosols and processes that would create droplets, preferring to use hand tools instead of an aerator, cavitron, or micromotor, postponed appointments of potentially infected patients for at least 14 days	Yes	Yes	Yes	Undecided	endodontics	Yes	No
3	Female	No	I don’t know	I don’t know	No	Websites or social media accounts of professional organizations, such as the Ministry of Health, Dental Association, and WHO, From information meetings held in institutions, Published scientific articles, Physicians’ individual websites or social media accounts, Social media accounts, like Instagram, Facebook, and Twitter, Television and radio programs, Communication groups, such as Whatsapp or L…	gloves, mask, frequent hand-washing , Use of cologne, wet wipes, and hand disinfectant , not entering public areas , not having physical contact (handshaking, kissing, etc.) , frequent ventilation of the environment	None	None	Undecided	Yes	Yes	Undecided	restorative dentistry	Yes	Yes
3	Male	Yes	No	I don’t know	No	Websites or social media accounts of professional organizations, such as the Ministry of Health, Dental Association, and WHO, From information meetings held in institutions, Social media accounts, like Instagram, Facebook, and Twitter, Television and radio programs	frequent hand-washing , Use of cologne, wet wipes, and hand disinfectant , not entering public areas , not having physical contact (handshaking, kissing, etc.) , frequent ventilation of the environment , changing clothes upon arrival home ,taking a shower upon arrival home	mask, gloves	asked whether the patient had symptoms, such as fever, cough, or shortness of breath, applied a rubber dam, rinsed the mouth with a mouthwash containing chlorhexidin, avoided aerosols and processes that would create droplets, postponed appointments of potentially infected patients for at least 14 days	Yes	Yes	Yes	No	periodontology	Yes	No
3	Female	No	No	No	Yes	Websites or social media accounts of professional organizations, such as the Ministry of Health, Dental Association, and WHO, Physicians’ individual websites or social media accounts, Social media accounts, like Instagram, Facebook, and Twitter, Television and radio programs	gloves, mask, frequent hand-washing , Use of cologne, wet wipes, and hand disinfectant , not entering public areas , not having physical contact (handshaking, kissing, etc.) , frequent ventilation of the environment , changing clothes upon arrival home ,taking a shower upon arrival home	mask, gloves, frequent hand-washing , frequent hand antiseptic	asked whether the patient had symptoms, such as fever, cough, or shortness of breath, applied a rubber dam, rinsed the mouth with a mouthwash containing chlorhexidin, used a strong saliva absorber during the procedure, ,, avoided aerosols and processes that would create droplets, preferring to use hand tools instead of an aerator, cavitron, or micromotor, postponed appointments of potentially inf…	Yes	Yes	Yes	Yes	endodontics	Yes	No
4	Female	No	No	No	No	Websites or social media accounts of professional organizations, such as the Ministry of Health, Dental Association, and WHO, Physicians’ individual websites or social media accounts, Social media accounts, like Instagram, Facebook, and Twitter, Television and radio programs, Communication groups, such as Whatsapp or Line.	gloves, mask, frequent hand-washing , Use of cologne, wet wipes, and hand disinfectant , not entering public areas , not having physical contact (handshaking, kissing, etc.) , frequent ventilation of the environment , changing clothes upon arrival home	mask, gloves, safety glasses, face protective shield, bonnet, frequent hand-washing , frequent hand antiseptic	asked whether the patient had symptoms, such as fever, cough, or shortness of breath, used a strong saliva absorber during the procedure, postponed appointments of potentially infected patients for at least 14 days	Yes	Yes	Yes	Yes	restorative dentistry	Yes	No
3	Male	No	No	No	Yes	Websites or social media accounts of professional organizations, such as the Ministry of Health, Dental Association, and WHO, From information meetings held in institutions, Physicians’ individual websites or social media accounts, Television and radio programs	frequent hand-washing , Use of cologne, wet wipes, and hand disinfectant , not entering public areas , not having physical contact (handshaking, kissing, etc.) , frequent ventilation of the environment , changing clothes upon arrival home ,taking a shower upon arrival home	mask, gloves, face protective shield, frequent hand-washing , frequent hand antiseptic	applied a rubber dam	Undecided	Undecided	Yes	Yes	oral and maxillofacial surgery	Yes	No
3	Female	No	No	I don’t know	No	Websites or social media accounts of professional organizations, such as the Ministry of Health, Dental Association, and WHO, Social media accounts, like Instagram, Facebook, and Twitter, Television and radio programs, Communication groups, such as Whatsapp or Line.	gloves, frequent hand-washing , Use of cologne, wet wipes, and hand disinfectant , not entering public areas , not having physical contact (handshaking, kissing, etc.) , frequent ventilation of the environment , changing clothes upon arrival home ,taking a shower upon arrival home	mask, gloves, frequent hand-washing , frequent hand antiseptic	asked whether the patient had symptoms, such as fever, cough, or shortness of breath, measured the patient’s fever, used a strong saliva absorber during the procedure, avoided aerosols and processes that would create droplets, preferring to use hand tools instead of an aerator, cavitron, or micromotor, postponed appointments of potentially infected patients for at least 14 days	Yes	Yes	Yes	Undecided	oral and maxillofacial surgery	Yes	No
3	Female	No	No	No	No	Websites or social media accounts of professional organizations, such as the Ministry of Health, Dental Association, and WHO, Published scientific articles, Physicians’ individual websites or social media accounts, Television and radio programs	gloves, mask, frequent hand-washing , Use of cologne, wet wipes, and hand disinfectant , not entering public areas , not having physical contact (handshaking, kissing, etc.) , frequent ventilation of the environment , changing clothes upon arrival home ,taking a shower upon arrival home	mask, gloves, frequent hand-washing , frequent hand antiseptic	asked whether the patient had symptoms, such as fever, cough, or shortness of breath, measured the patient’s fever, applied a rubber dam, rinsed the mouth with a mouthwash containing chlorhexidin, used a strong saliva absorber during the procedure, avoided aerosols and processes that would create droplets, preferring to use hand tools instead of an aerator, cavitron, or micromotor, postponed appo…	Yes	Yes	Yes	Yes	endodontics	Yes	Undecided
3	Male	No	No	I don’t know	No	Websites or social media accounts of professional organizations, such as the Ministry of Health, Dental Association, and WHO, Published scientific articles, Physicians’ individual websites or social media accounts, Social media accounts, like Instagram, Facebook, and Twitter	mask, frequent hand-washing , Use of cologne, wet wipes, and hand disinfectant , not entering public areas , not having physical contact (handshaking, kissing, etc.) , frequent ventilation of the environment , changing clothes upon arrival home ,taking a shower upon arrival home	mask, gloves	asked whether the patient had symptoms, such as fever, cough, or shortness of breath, rinsed the mouth with a mouthwash containing chlorhexidin, avoided aerosols and processes that would create droplets, preferring to use hand tools instead of an aerator, cavitron, or micromotor, postponed appointments of potentially infected patients for at least 14 days	No	Undecided	Undecided	No	oral and maxillofacial surgery	Yes	No
5	Male	Yes	No	No	No	Published scientific articles	gloves, frequent hand-washing , Use of cologne, wet wipes, and hand disinfectant , not entering public areas , not having physical contact (handshaking, kissing, etc.) , changing clothes upon arrival home ,taking a shower upon arrival home	mask, gloves, frequent hand-washing , frequent hand antiseptic	asked whether the patient had symptoms, such as fever, cough, or shortness of breath, avoided aerosols and processes that would create droplets	Yes	Yes	Yes	Yes	endodontics	Yes	No
4	Male	No	No	I don’t know	No	Websites or social media accounts of professional organizations, such as the Ministry of Health, Dental Association, and WHO	mask, frequent hand-washing	mask, gloves, face protective shield, frequent hand-washing , frequent hand antiseptic	asked whether the patient had symptoms, such as fever, cough, or shortness of breath, applied a rubber dam	No	Yes	Yes	No	periodontology	Yes	No
3	Male	No	No	Yes	No	Websites or social media accounts of professional organizations, such as the Ministry of Health, Dental Association, and WHO, Published scientific articles, Physicians’ individual websites or social media accounts, Television and radio programs, Communication groups, such as Whatsapp or Line.	gloves, mask, frequent hand-washing , Use of cologne, wet wipes, and hand disinfectant , not entering public areas , not having physical contact (handshaking, kissing, etc.) , frequent ventilation of the environment , changing clothes upon arrival home ,taking a shower upon arrival home	mask, gloves, frequent hand-washing , frequent hand antiseptic	asked whether the patient had symptoms, such as fever, cough, or shortness of breath, measured the patient’s fever, postponed appointments of potentially infected patients for at least 14 days	Yes	Yes	Yes	No	oral and maxillofacial surgery	Yes	No
5	Female	Yes	No	I don’t know	No	From information meetings held in institutions, Physicians’ individual websites or social media accounts, Social media accounts, like Instagram, Facebook, and Twitter	frequent hand-washing , Use of cologne, wet wipes, and hand disinfectant , not entering public areas , frequent ventilation of the environment	mask, gloves, safety glasses, face protective shield, frequent hand-washing , frequent hand antiseptic	asked whether the patient had symptoms, such as fever, cough, or shortness of breath, None	Yes	Yes	Yes	Yes	prosthesis	Yes	Yes
3	Male	No	No	No	No	Websites or social media accounts of professional organizations, such as the Ministry of Health, Dental Association, and WHO, Social media accounts, like Instagram, Facebook, and Twitter, Television and radio programs	frequent hand-washing , not entering public areas , not having physical contact (handshaking, kissing, etc.) , frequent ventilation of the environment	mask, frequent hand-washing , frequent hand antiseptic	asked whether the patient had symptoms, such as fever, cough, or shortness of breath, measured the patient’s fever, avoided aerosols and processes that would create droplets, preferring to use hand tools instead of an aerator, cavitron, or micromotor, postponed appointments of potentially infected patients for at least 14 days	Yes	Yes	Yes	Yes	prosthesis	Yes	No
3	Male	No	No	No	No	Websites or social media accounts of professional organizations, such as the Ministry of Health, Dental Association, and WHO, Physicians’ individual websites or social media accounts, Social media accounts, like Instagram, Facebook, and Twitter, Television and radio programs	frequent hand-washing , Use of cologne, wet wipes, and hand disinfectant , not entering public areas , not having physical contact (handshaking, kissing, etc.) , changing clothes upon arrival home	mask, gloves, safety glasses, frequent hand-washing , frequent hand antiseptic	avoided aerosols and processes that would create droplets	Yes	Yes	Yes	No	periodontology	Yes	No
3	Male	No	I don’t know	I don’t know	No	Websites or social media accounts of professional organizations, such as the Ministry of Health, Dental Association, and WHO, Social media accounts, like Instagram, Facebook, and Twitter, Television and radio programs	frequent hand-washing , not entering public areas , frequent ventilation of the environment	mask, gloves, frequent hand-washing , frequent hand antiseptic	None	Yes	Yes	Yes	Yes	periodontology	Yes	Undecided
3	Female	Yes	No	No	No	Websites or social media accounts of professional organizations, such as the Ministry of Health, Dental Association, and WHO, Physicians’ individual websites or social media accounts, Television and radio programs	gloves, mask	mask, gloves, face protective shield	used a strong saliva absorber during the procedure, avoided aerosols and processes that would create droplets	No	Yes	Yes	No	oral and maxillofacial surgery	Yes	No
3	Female	Yes	I don’t know	No	No	Websites or social media accounts of professional organizations, such as the Ministry of Health, Dental Association, and WHO	frequent hand-washing , Use of cologne, wet wipes, and hand disinfectant , not entering public areas , not having physical contact (handshaking, kissing, etc.) , changing clothes upon arrival home	gloves, frequent hand-washing , frequent hand antiseptic	None	Yes	Undecided	Undecided	Yes	prosthesis	Yes	No
4	Female	Yes	No	No	No	From information meetings held in institutions, Published scientific articles, Television and radio programs, Communication groups, such as Whatsapp or Line.	mask, frequent hand-washing , Use of cologne, wet wipes, and hand disinfectant , not entering public areas , not having physical contact (handshaking, kissing, etc.) , frequent ventilation of the environment , changing clothes upon arrival home	mask, gloves, face protective shield, frequent hand-washing , frequent hand antiseptic	asked whether the patient had symptoms, such as fever, cough, or shortness of breath, postponed appointments of potentially infected patients for at least 14 days	Yes	Yes	Yes	Yes	endodontics	Yes	No
3	Female	No	I don’t know	I don’t know	No	Websites or social media accounts of professional organizations, such as the Ministry of Health, Dental Association, and WHO, Physicians’ individual websites or social media accounts, Social media accounts, like Instagram, Facebook, and Twitter, Television and radio programs, Communication groups, such as Whatsapp or Line.	mask, frequent hand-washing , Use of cologne, wet wipes, and hand disinfectant , not entering public areas , not having physical contact (handshaking, kissing, etc.) , frequent ventilation of the environment , changing clothes upon arrival home	FFP3/N95 mask, gloves, safety glasses, face protective shield, bonnet, frequent hand-washing , frequent hand antiseptic	asked whether the patient had symptoms, such as fever, cough, or shortness of breath, measured the patient’s fever, applied a rubber dam, rinsed the mouth with a mouthwash containing chlorhexidin, used a strong saliva absorber during the procedure, avoided aerosols and processes that would create droplets, preferring to use hand tools instead of an aerator, cavitron, or micromotor, postponed appo…	Undecided	Yes	Yes	Undecided	prosthesis	Yes	No
3	Female	No	I don’t know	I don’t know	No	Websites or social media accounts of professional organizations, such as the Ministry of Health, Dental Association, and WHO, Physicians’ individual websites or social media accounts, Social media accounts, like Instagram, Facebook, and Twitter, Television and radio programs, Communication groups, such as Whatsapp or Line.	mask, frequent hand-washing , Use of cologne, wet wipes, and hand disinfectant , not entering public areas , not having physical contact (handshaking, kissing, etc.) , frequent ventilation of the environment , changing clothes upon arrival home	FFP3/N95 mask, gloves, safety glasses, face protective shield, bonnet, frequent hand-washing , frequent hand antiseptic	asked whether the patient had symptoms, such as fever, cough, or shortness of breath, measured the patient’s fever, applied a rubber dam, rinsed the mouth with a mouthwash containing chlorhexidin, used a strong saliva absorber during the procedure, avoided aerosols and processes that would create droplets, preferring to use hand tools instead of an aerator, cavitron, or micromotor, postponed appo…	Undecided	Yes	Yes	Undecided	prosthesis	Yes	No
3	Male	Yes	No	No	No	Websites or social media accounts of professional organizations, such as the Ministry of Health, Dental Association, and WHO	frequent hand-washing , Use of cologne, wet wipes, and hand disinfectant , not entering public areas , not having physical contact (handshaking, kissing, etc.) , frequent ventilation of the environment , changing clothes upon arrival home ,taking a shower upon arrival home	mask, gloves, face protective shield, bonnet, Tek kullanımlık box önlüğü, frequent hand-washing , frequent hand antiseptic	asked whether the patient had symptoms, such as fever, cough, or shortness of breath, measured the patient’s fever, applied a rubber dam, rinsed the mouth with a mouthwash containing chlorhexidin, ,	No	No	Yes	No	oral and maxillofacial surgery	Yes	No
3	Female	No	I don’t know	I don’t know	Yes	Websites or social media accounts of professional organizations, such as the Ministry of Health, Dental Association, and WHO, Social media accounts, like Instagram, Facebook, and Twitter, Television and radio programs	gloves, mask, frequent hand-washing , Use of cologne, wet wipes, and hand disinfectant , not entering public areas , not having physical contact (handshaking, kissing, etc.) , frequent ventilation of the environment , changing clothes upon arrival home	mask, gloves, frequent hand-washing , frequent hand antiseptic	asked whether the patient had symptoms, such as fever, cough, or shortness of breath, measured the patient’s fever, applied a rubber dam, used a strong saliva absorber during the procedure, avoided aerosols and processes that would create droplets	Yes	Yes	Yes	Undecided	restorative dentistry	Yes	No
5	Male	Yes	No	No	No	Websites or social media accounts of professional organizations, such as the Ministry of Health, Dental Association, and WHO, Social media accounts, like Instagram, Facebook, and Twitter, Television and radio programs	gloves, mask, frequent hand-washing , Use of cologne, wet wipes, and hand disinfectant , not entering public areas , not having physical contact (handshaking, kissing, etc.)	mask, gloves, face protective shield, frequent hand-washing , frequent hand antiseptic	used a strong saliva absorber during the procedure	Yes	Yes	Yes	Undecided	endodontics	Undecided	Undecided
3	Female	No	I don’t know	No	No	Social media accounts, like Instagram, Facebook, and Twitter, Television and radio programs	frequent hand-washing , Use of cologne, wet wipes, and hand disinfectant , not entering public areas , not having physical contact (handshaking, kissing, etc.) , frequent ventilation of the environment , changing clothes upon arrival home ,taking a shower upon arrival home	mask, gloves, face protective shield, bonnet, frequent hand-washing , frequent hand antiseptic	asked whether the patient had symptoms, such as fever, cough, or shortness of breath, measured the patient’s fever, applied a rubber dam, rinsed the mouth with a mouthwash containing chlorhexidin, used a strong saliva absorber during the procedure, avoided aerosols and processes that would create droplets, preferring to use hand tools instead of an aerator, cavitron, or micromotor, postponed appo…	Yes	Yes	Yes	Yes	endodontics	Yes	Undecided
3	Male	No	No	Yes	No	Websites or social media accounts of professional organizations, such as the Ministry of Health, Dental Association, and WHO	frequent hand-washing , Use of cologne, wet wipes, and hand disinfectant , not entering public areas , not having physical contact (handshaking, kissing, etc.) , frequent ventilation of the environment , changing clothes upon arrival home	mask, gloves, frequent hand-washing , frequent hand antiseptic	None	No	No	Yes	No	prosthesis	Yes	No
3	Female	No	No	I don’t know	No	Websites or social media accounts of professional organizations, such as the Ministry of Health, Dental Association, and WHO, Physicians’ individual websites or social media accounts, Television and radio programs	frequent hand-washing , Use of cologne, wet wipes, and hand disinfectant , not entering public areas , not having physical contact (handshaking, kissing, etc.) , frequent ventilation of the environment , changing clothes upon arrival home ,taking a shower upon arrival home , Son 10 gündür evden dışarı çıkmıyorum.	mask, gloves, frequent hand-washing , frequent hand antiseptic	asked whether the patient had symptoms, such as fever, cough, or shortness of breath, measured the patient’s fever, applied a rubber dam, rinsed the mouth with a mouthwash containing chlorhexidin, ,, ,, used a strong saliva absorber during the procedure, ,, avoided aerosols and processes that would create droplets, preferring to use hand tools instead of an aerator, cavitron, or micromotor, postp…	Yes	Yes	Yes	Yes	endodontics	Yes	Yes
3	Female	No	No	I don’t know	No	Websites or social media accounts of professional organizations, such as the Ministry of Health, Dental Association, and WHO, Physicians’ individual websites or social media accounts, Television and radio programs	frequent hand-washing , Use of cologne, wet wipes, and hand disinfectant , not entering public areas , not having physical contact (handshaking, kissing, etc.) , frequent ventilation of the environment , changing clothes upon arrival home	mask, gloves, frequent hand-washing , frequent hand antiseptic	asked whether the patient had symptoms, such as fever, cough, or shortness of breath, measured the patient’s fever, rinsed the mouth with a mouthwash containing chlorhexidin, avoided aerosols and processes that would create droplets, preferring to use hand tools instead of an aerator, cavitron, or micromotor, postponed appointments of potentially infected patients for at least 14 days	Yes	Yes	Yes	Yes	prosthesis	Yes	No
4	Male	Yes	No	No	Yes	Websites or social media accounts of professional organizations, such as the Ministry of Health, Dental Association, and WHO, From information meetings held in institutions, Published scientific articles, Social media accounts, like Instagram, Facebook, and Twitter, Television and radio programs	mask, frequent hand-washing , Use of cologne, wet wipes, and hand disinfectant , not entering public areas , not having physical contact (handshaking, kissing, etc.) , frequent ventilation of the environment	mask, gloves, safety glasses, face protective shield, bonnet, Tek kullanımlık box önlüğü, frequent hand-washing , frequent hand antiseptic	asked whether the patient had symptoms, such as fever, cough, or shortness of breath, measured the patient’s fever, applied a rubber dam, rinsed the mouth with a mouthwash containing chlorhexidin, used a strong saliva absorber during the procedure, avoided aerosols and processes that would create droplets, preferring to use hand tools instead of an aerator, cavitron, or micromotor, postponed appo…	No	No	No	No	endodontics	Yes	No
3	Male	No	No	I don’t know	No	Television and radio programs	frequent hand-washing , Use of cologne, wet wipes, and hand disinfectant , not entering public areas , frequent ventilation of the environment	mask, gloves	measured the patient’s fever	Yes	Yes	Yes	Yes	endodontics	Undecided	Yes
3	Male	No	No	No	No	Websites or social media accounts of professional organizations, such as the Ministry of Health, Dental Association, and WHO	frequent hand-washing , Use of cologne, wet wipes, and hand disinfectant , not entering public areas , not having physical contact (handshaking, kissing, etc.) , frequent ventilation of the environment , changing clothes upon arrival home	mask	None	Yes	Yes	Yes	Yes	oral and maxillofacial surgery	Undecided	No
3	Female	No	No	I don’t know	Yes	Websites or social media accounts of professional organizations, such as the Ministry of Health, Dental Association, and WHO, Published scientific articles	gloves, mask, frequent hand-washing , Use of cologne, wet wipes, and hand disinfectant , not entering public areas , not having physical contact (handshaking, kissing, etc.) , frequent ventilation of the environment , changing clothes upon arrival home ,taking a shower upon arrival home , Dışarıdan aldığım her ürünün paketini yıkıyorum	mask, gloves, face protective shield, bonnet, frequent hand-washing , frequent hand antiseptic	asked whether the patient had symptoms, such as fever, cough, or shortness of breath, applied a rubber dam, rinsed the mouth with a mouthwash containing chlorhexidin, ,, avoided aerosols and processes that would create droplets, postponed appointments of potentially infected patients for at least 14 days	Yes	Yes	Yes	No	oral and maxillofacial surgery	Yes	No
4	Male	No	No	I don’t know	No	Websites or social media accounts of professional organizations, such as the Ministry of Health, Dental Association, and WHO, Social media accounts, like Instagram, Facebook, and Twitter, Television and radio programs	frequent hand-washing , Use of cologne, wet wipes, and hand disinfectant , not entering public areas , not having physical contact (handshaking, kissing, etc.) , frequent ventilation of the environment , changing clothes upon arrival home	mask, FFP3/N95 mask, gloves, safety glasses, face protective shield, bonnet, Tek kullanımlık box önlüğü, frequent hand-washing , frequent hand antiseptic	asked whether the patient had symptoms, such as fever, cough, or shortness of breath, used a strong saliva absorber during the procedure, avoided aerosols and processes that would create droplets, preferring to use hand tools instead of an aerator, cavitron, or micromotor, postponed appointments of potentially infected patients for at least 14 days	No	Yes	Yes	Undecided	restorative dentistry	Yes	No
3	Female	Yes	No	No	No	Social media accounts, like Instagram, Facebook, and Twitter, Television and radio programs, Communication groups, such as Whatsapp or Line.	frequent hand-washing , Use of cologne, wet wipes, and hand disinfectant , not entering public areas , not having physical contact (handshaking, kissing, etc.) , frequent ventilation of the environment , changing clothes upon arrival home			Yes	Yes	Yes	Yes	periodontology	Yes	Undecided
4	Male	Yes	No	No	No	From information meetings held in institutions	not entering public areas , not having physical contact (handshaking, kissing, etc.) , frequent ventilation of the environment	mask, gloves, safety glasses, face protective shield, frequent hand-washing , frequent hand antiseptic	postponed appointments of potentially infected patients for at least 14 days	Yes	Yes	Yes	Undecided	endodontics	Yes	Yes
3	Male	No	Yes	Yes	No	Websites or social media accounts of professional organizations, such as the Ministry of Health, Dental Association, and WHO, Physicians’ individual websites or social media accounts, Social media accounts, like Instagram, Facebook, and Twitter, Television and radio programs	Use of cologne, wet wipes, and hand disinfectant , not entering public areas , not having physical contact (handshaking, kissing, etc.) , frequent ventilation of the environment , changing clothes upon arrival home	mask, gloves	None	Yes	Yes	Yes	No	periodontology	Undecided	No
3	Male	No	Yes	Yes	No	Websites or social media accounts of professional organizations, such as the Ministry of Health, Dental Association, and WHO, Physicians’ individual websites or social media accounts, Social media accounts, like Instagram, Facebook, and Twitter, Television and radio programs	Use of cologne, wet wipes, and hand disinfectant , not entering public areas , not having physical contact (handshaking, kissing, etc.) , frequent ventilation of the environment , changing clothes upon arrival home	mask, gloves	None	Yes	Yes	Yes	No	periodontology	Undecided	No
3	Male	No	No	No	No	Websites or social media accounts of professional organizations, such as the Ministry of Health, Dental Association, and WHO, From information meetings held in institutions, Published scientific articles, Physicians’ individual websites or social media accounts	mask, frequent hand-washing , Use of cologne, wet wipes, and hand disinfectant , not entering public areas , not having physical contact (handshaking, kissing, etc.) , frequent ventilation of the environment , changing clothes upon arrival home	mask, gloves, safety glasses, face protective shield, bonnet, frequent hand-washing , frequent hand antiseptic	asked whether the patient had symptoms, such as fever, cough, or shortness of breath, applied a rubber dam, rinsed the mouth with a mouthwash containing chlorhexidin, ,, used a strong saliva absorber during the procedure, avoided aerosols and processes that would create droplets, preferring to use hand tools instead of an aerator, cavitron, or micromotor	Yes	Yes	Yes	Yes	prosthesis	Yes	No
3	Female	No	Yes	I don’t know	No	Websites or social media accounts of professional organizations, such as the Ministry of Health, Dental Association, and WHO, Social media accounts, like Instagram, Facebook, and Twitter, Television and radio programs, Communication groups, such as Whatsapp or Line.	gloves, mask, frequent hand-washing , Use of cologne, wet wipes, and hand disinfectant , not entering public areas , not having physical contact (handshaking, kissing, etc.) , frequent ventilation of the environment , changing clothes upon arrival home	mask, gloves, face protective shield, frequent hand-washing , frequent hand antiseptic	asked whether the patient had symptoms, such as fever, cough, or shortness of breath	Yes	Yes	Yes	Yes	restorative dentistry	Yes	Yes
4	Male	No	No	Yes	No	Websites or social media accounts of professional organizations, such as the Ministry of Health, Dental Association, and WHO, Physicians’ individual websites or social media accounts, Social media accounts, like Instagram, Facebook, and Twitter	frequent hand-washing , Use of cologne, wet wipes, and hand disinfectant , not entering public areas , not having physical contact (handshaking, kissing, etc.) , frequent ventilation of the environment	mask, gloves, safety glasses, face protective shield, bonnet, frequent hand-washing , frequent hand antiseptic	asked whether the patient had symptoms, such as fever, cough, or shortness of breath, avoided aerosols and processes that would create droplets, preferring to use hand tools instead of an aerator, cavitron, or micromotor, postponed appointments of potentially infected patients for at least 14 days	Yes	Yes	Yes	Yes	periodontology	Yes	Undecided
5	Female	Yes	I don’t know	No	No	Websites or social media accounts of professional organizations, such as the Ministry of Health, Dental Association, and WHO, From information meetings held in institutions, Television and radio programs	mask, frequent hand-washing , Use of cologne, wet wipes, and hand disinfectant , not entering public areas , not having physical contact (handshaking, kissing, etc.) , frequent ventilation of the environment , changing clothes upon arrival home	mask, gloves, face protective shield, frequent hand-washing	None	Yes	Yes	Yes	Yes	prosthesis	Yes	No
5	Female	Yes	I don’t know	No	No	Websites or social media accounts of professional organizations, such as the Ministry of Health, Dental Association, and WHO, From information meetings held in institutions, Television and radio programs	mask, frequent hand-washing , Use of cologne, wet wipes, and hand disinfectant , not entering public areas , not having physical contact (handshaking, kissing, etc.) , frequent ventilation of the environment , changing clothes upon arrival home	mask, gloves, face protective shield, frequent hand-washing	None	Yes	Yes	Yes	Yes	prosthesis	Yes	No
5	Male	No	No	Yes	No	Websites or social media accounts of professional organizations, such as the Ministry of Health, Dental Association, and WHO, Physicians’ individual websites or social media accounts, Social media accounts, like Instagram, Facebook, and Twitter, Television and radio programs	frequent hand-washing , Use of cologne, wet wipes, and hand disinfectant , not entering public areas , not having physical contact (handshaking, kissing, etc.) , frequent ventilation of the environment	mask, gloves, safety glasses, face protective shield, bonnet, Tek kullanımlık box önlüğü, frequent hand-washing , frequent hand antiseptic	asked whether the patient had symptoms, such as fever, cough, or shortness of breath, measured the patient’s fever, applied a rubber dam, rinsed the mouth with a mouthwash containing chlorhexidin, ,, ,, used a strong saliva absorber during the procedure, avoided aerosols and processes that would create droplets, preferring to use hand tools instead of an aerator, cavitron, or micromotor, postpone…	No	Yes	Yes	No	oral and maxillofacial surgery	Yes	No
3	Male	No	No	No	No	Websites or social media accounts of professional organizations, such as the Ministry of Health, Dental Association, and WHO, Published scientific articles, Physicians’ individual websites or social media accounts	gloves, mask, frequent hand-washing , Use of cologne, wet wipes, and hand disinfectant , not entering public areas , not having physical contact (handshaking, kissing, etc.) ,taking a shower upon arrival home	mask, gloves, frequent hand-washing , frequent hand antiseptic	asked whether the patient had symptoms, such as fever, cough, or shortness of breath, measured the patient’s fever	No	No	Yes	Undecided	periodontology	Yes	No
3	Female	No	No	Yes	No	Social media accounts, like Instagram, Facebook, and Twitter, Television and radio programs	mask, frequent hand-washing , Use of cologne, wet wipes, and hand disinfectant , not entering public areas , not having physical contact (handshaking, kissing, etc.) , changing clothes upon arrival home ,taking a shower upon arrival home	mask, frequent hand antiseptic	None	Yes	Yes	Yes	Yes	endodontics	Yes	No
5	Female	No	No	I don’t know	No	Websites or social media accounts of professional organizations, such as the Ministry of Health, Dental Association, and WHO, Published scientific articles, Physicians’ individual websites or social media accounts, Social media accounts, like Instagram, Facebook, and Twitter, Television and radio programs	frequent hand-washing , not entering public areas , not having physical contact (handshaking, kissing, etc.) , frequent ventilation of the environment	frequent hand-washing , frequent hand antiseptic	asked whether the patient had symptoms, such as fever, cough, or shortness of breath, used a strong saliva absorber during the procedure, avoided aerosols and processes that would create droplets	No	Yes	Yes	Yes	periodontology	Yes	No
3	Female	No	No	I don’t know	No	From information meetings held in institutions	frequent hand-washing , Use of cologne, wet wipes, and hand disinfectant , not entering public areas , changing clothes upon arrival home	mask, gloves, frequent hand-washing , frequent hand antiseptic	asked whether the patient had symptoms, such as fever, cough, or shortness of breath, rinsed the mouth with a mouthwash containing chlorhexidin, avoided aerosols and processes that would create droplets	Yes	Yes	Yes	Yes	periodontology	Undecided	No
3	Male	No	No	No	No	Websites or social media accounts of professional organizations, such as the Ministry of Health, Dental Association, and WHO, Published scientific articles	frequent hand-washing , Use of cologne, wet wipes, and hand disinfectant , not entering public areas , not having physical contact (handshaking, kissing, etc.) , frequent ventilation of the environment , changing clothes upon arrival home	mask, gloves, frequent hand-washing	asked whether the patient had symptoms, such as fever, cough, or shortness of breath, measured the patient’s fever, applied a rubber dam, rinsed the mouth with a mouthwash containing chlorhexidin, postponed appointments of potentially infected patients for at least 14 days	No	No	Yes	No	prosthesis	Yes	No
4	Female	Yes	No	No	No	Websites or social media accounts of professional organizations, such as the Ministry of Health, Dental Association, and WHO, From information meetings held in institutions, Physicians’ individual websites or social media accounts, Social media accounts, like Instagram, Facebook, and Twitter, Television and radio programs, Communication groups, such as Whatsapp or Line., Bilimsel dergilerden	mask, frequent hand-washing , Use of cologne, wet wipes, and hand disinfectant , not entering public areas , not having physical contact (handshaking, kissing, etc.) , frequent ventilation of the environment , changing clothes upon arrival home ,taking a shower upon arrival home	mask, gloves, bonnet, frequent hand-washing , frequent hand antiseptic	asked whether the patient had symptoms, such as fever, cough, or shortness of breath, measured the patient’s fever, applied a rubber dam, used a strong saliva absorber during the procedure, avoided aerosols and processes that would create droplets, preferring to use hand tools instead of an aerator, cavitron, or micromotor, postponed appointments of potentially infected patients for at least 14 d…	Yes	Yes	Yes	No	prosthesis	Yes	No
3	Male	No	No	I don’t know	No	Websites or social media accounts of professional organizations, such as the Ministry of Health, Dental Association, and WHO, Social media accounts, like Instagram, Facebook, and Twitter, Television and radio programs	gloves, mask, frequent hand-washing , Use of cologne, wet wipes, and hand disinfectant , not entering public areas , not having physical contact (handshaking, kissing, etc.) , frequent ventilation of the environment , changing clothes upon arrival home	mask, gloves, bonnet, frequent hand antiseptic	None	Yes	Yes	Yes	No	oral and maxillofacial surgery	Yes	No
3	Male	Yes	No	No	Yes	Websites or social media accounts of professional organizations, such as the Ministry of Health, Dental Association, and WHO, Published scientific articles, Physicians’ individual websites or social media accounts, Social media accounts, like Instagram, Facebook, and Twitter	frequent hand-washing , Use of cologne, wet wipes, and hand disinfectant , not having physical contact (handshaking, kissing, etc.) , frequent ventilation of the environment , changing clothes upon arrival home	FFP3/N95 mask, gloves, safety glasses, face protective shield, bonnet, Tek kullanımlık box önlüğü, frequent hand-washing , frequent hand antiseptic	postponed appointments of potentially infected patients for at least 14 days	Yes	Yes	Yes	Yes	endodontics	Yes	Yes
5	Female	No	No	I don’t know	No	Websites or social media accounts of professional organizations, such as the Ministry of Health, Dental Association, and WHO, Social media accounts, like Instagram, Facebook, and Twitter, Television and radio programs	frequent hand-washing , Use of cologne, wet wipes, and hand disinfectant , not entering public areas , not having physical contact (handshaking, kissing, etc.) , frequent ventilation of the environment , changing clothes upon arrival home	mask, gloves, face protective shield, bonnet, frequent hand-washing , frequent hand antiseptic	avoided aerosols and processes that would create droplets, postponed appointments of potentially infected patients for at least 14 days	Yes	Yes	Yes	Undecided	endodontics	Yes	No
3	Female	No	No	No	No	Websites or social media accounts of professional organizations, such as the Ministry of Health, Dental Association, and WHO, From information meetings held in institutions, Published scientific articles, Physicians’ individual websites or social media accounts	frequent hand-washing , Use of cologne, wet wipes, and hand disinfectant , not entering public areas , not having physical contact (handshaking, kissing, etc.) , frequent ventilation of the environment , changing clothes upon arrival home ,taking a shower upon arrival home	mask, gloves, frequent hand-washing , frequent hand antiseptic	asked whether the patient had symptoms, such as fever, cough, or shortness of breath, measured the patient’s fever, applied a rubber dam, used a strong saliva absorber during the procedure, avoided aerosols and processes that would create droplets, postponed appointments of potentially infected patients for at least 14 days	Yes	Yes	Yes	No	endodontics	Yes	No
4	Female	No	No	No	No	Physicians’ individual websites or social media accounts, Social media accounts, like Instagram, Facebook, and Twitter, Television and radio programs, Communication groups, such as Whatsapp or Line.	frequent hand-washing , Use of cologne, wet wipes, and hand disinfectant , not entering public areas , not having physical contact (handshaking, kissing, etc.) , frequent ventilation of the environment	mask, gloves, safety glasses, frequent hand-washing , frequent hand antiseptic	asked whether the patient had symptoms, such as fever, cough, or shortness of breath, rinsed the mouth with a mouthwash containing chlorhexidin, used a strong saliva absorber during the procedure, postponed appointments of potentially infected patients for at least 14 days	Yes	Yes	Yes	Yes	periodontology	Yes	Undecided
4	Male	Yes	No	No	No	Websites or social media accounts of professional organizations, such as the Ministry of Health, Dental Association, and WHO, Physicians’ individual websites or social media accounts, Television and radio programs	frequent hand-washing , Use of cologne, wet wipes, and hand disinfectant , not entering public areas , not having physical contact (handshaking, kissing, etc.) , changing clothes upon arrival home	mask, gloves, face protective shield	None	Yes	Yes	Yes	No	periodontology	Yes	No
4	Male	No	No	I don’t know	No	Websites or social media accounts of professional organizations, such as the Ministry of Health, Dental Association, and WHO, Physicians’ individual websites or social media accounts, Social media accounts, like Instagram, Facebook, and Twitter, Communication groups, such as Whatsapp or Line.	gloves, mask, frequent hand-washing , Use of cologne, wet wipes, and hand disinfectant , not entering public areas , not having physical contact (handshaking, kissing, etc.) , frequent ventilation of the environment , changing clothes upon arrival home ,taking a shower upon arrival home	mask, gloves	asked whether the patient had symptoms, such as fever, cough, or shortness of breath, avoided aerosols and processes that would create droplets, postponed appointments of potentially infected patients for at least 14 days	Yes	Yes	Yes	Yes	oral diagnosis and radiology	Yes	Yes
4	Male	No	No	No	No	Social media accounts, like Instagram, Facebook, and Twitter, Television and radio programs	frequent hand-washing , not entering public areas , not having physical contact (handshaking, kissing, etc.) , frequent ventilation of the environment	mask, gloves, safety glasses, face protective shield, bonnet, frequent hand-washing , frequent hand antiseptic	asked whether the patient had symptoms, such as fever, cough, or shortness of breath, measured the patient’s fever, avoided aerosols and processes that would create droplets, preferring to use hand tools instead of an aerator, cavitron, or micromotor, postponed appointments of potentially infected patients for at least 14 days	Yes	Yes	Yes	No	endodontics	Yes	No
4	Male	Yes	No	No	No	Websites or social media accounts of professional organizations, such as the Ministry of Health, Dental Association, and WHO, From information meetings held in institutions, Physicians’ individual websites or social media accounts, Social media accounts, like Instagram, Facebook, and Twitter, Television and radio programs, Communication groups, such as Whatsapp or Line.	gloves, mask, frequent hand-washing , Use of cologne, wet wipes, and hand disinfectant , not entering public areas , not having physical contact (handshaking, kissing, etc.) , frequent ventilation of the environment , changing clothes upon arrival home ,taking a shower upon arrival home	mask, gloves, safety glasses, bonnet, frequent hand-washing , frequent hand antiseptic	used a strong saliva absorber during the procedure	No	Yes	Yes	No	periodontology	Yes	No
3	Male	No	No	I don’t know	Yes	Television and radio programs	mask, frequent hand-washing , Use of cologne, wet wipes, and hand disinfectant , not entering public areas , not having physical contact (handshaking, kissing, etc.) , frequent ventilation of the environment	mask, gloves, frequent hand-washing , frequent hand antiseptic	asked whether the patient had symptoms, such as fever, cough, or shortness of breath, measured the patient’s fever, rinsed the mouth with a mouthwash containing chlorhexidin, used a strong saliva absorber during the procedure, avoided aerosols and processes that would create droplets, postponed appointments of potentially infected patients for at least 14 days	Yes	No	Yes	No	periodontology	Yes	No
3	Female	No	No	No	Yes	Websites or social media accounts of professional organizations, such as the Ministry of Health, Dental Association, and WHO, Physicians’ individual websites or social media accounts, Social media accounts, like Instagram, Facebook, and Twitter	frequent hand-washing , Use of cologne, wet wipes, and hand disinfectant , not entering public areas , not having physical contact (handshaking, kissing, etc.) , frequent ventilation of the environment	mask, gloves, frequent hand-washing , frequent hand antiseptic	asked whether the patient had symptoms, such as fever, cough, or shortness of breath	Yes	Yes	Yes	No	periodontology	Yes	No
4	Female	No	I don’t know	I don’t know	No	Social media accounts, like Instagram, Facebook, and Twitter	Use of cologne, wet wipes, and hand disinfectant , not entering public areas , not having physical contact (handshaking, kissing, etc.)	mask, gloves, face protective shield, frequent hand-washing , frequent hand antiseptic	asked whether the patient had symptoms, such as fever, cough, or shortness of breath, used a strong saliva absorber during the procedure, avoided aerosols and processes that would create droplets, preferring to use hand tools instead of an aerator, cavitron, or micromotor, postponed appointments of potentially infected patients for at least 14 days	Yes	Yes	Yes	Yes	periodontology	Yes	No
3	Female	No	No	I don’t know	No	Websites or social media accounts of professional organizations, such as the Ministry of Health, Dental Association, and WHO, Published scientific articles, Physicians’ individual websites or social media accounts, Television and radio programs	frequent hand-washing , Use of cologne, wet wipes, and hand disinfectant , not entering public areas , not having physical contact (handshaking, kissing, etc.) , frequent ventilation of the environment , changing clothes upon arrival home	mask, gloves, safety glasses, face protective shield, bonnet, Tek kullanımlık box önlüğü, frequent hand-washing , frequent hand antiseptic	asked whether the patient had symptoms, such as fever, cough, or shortness of breath, rinsed the mouth with a mouthwash containing chlorhexidin, used a strong saliva absorber during the procedure, avoided aerosols and processes that would create droplets, preferring to use hand tools instead of an aerator, cavitron, or micromotor, postponed appointments of potentially infected patients for at lea…	No	Yes	Yes	No	endodontics	Yes	No
4	Male	Yes	I don’t know	I don’t know	No	Websites or social media accounts of professional organizations, such as the Ministry of Health, Dental Association, and WHO, Social media accounts, like Instagram, Facebook, and Twitter, Television and radio programs	frequent hand-washing , Use of cologne, wet wipes, and hand disinfectant , not entering public areas , not having physical contact (handshaking, kissing, etc.) , frequent ventilation of the environment	mask, gloves, safety glasses, face protective shield, bonnet, frequent hand-washing , frequent hand antiseptic	asked whether the patient had symptoms, such as fever, cough, or shortness of breath, used a strong saliva absorber during the procedure, avoided aerosols and processes that would create droplets, preferring to use hand tools instead of an aerator, cavitron, or micromotor, postponed appointments of potentially infected patients for at least 14 days	No	Yes	Yes	No	periodontology	Yes	Undecided
4	Male	No	No	I don’t know	No	Websites or social media accounts of professional organizations, such as the Ministry of Health, Dental Association, and WHO, Television and radio programs	frequent hand-washing , not entering public areas , not having physical contact (handshaking, kissing, etc.) , changing clothes upon arrival home	mask, gloves, frequent hand-washing , frequent hand antiseptic	None	Yes	Yes	Yes	Yes	oral diagnosis and radiology	Yes	No
5	Male	No	No	No	No	Websites or social media accounts of professional organizations, such as the Ministry of Health, Dental Association, and WHO, Social media accounts, like Instagram, Facebook, and Twitter	gloves, mask, frequent hand-washing , Use of cologne, wet wipes, and hand disinfectant , not having physical contact (handshaking, kissing, etc.) , frequent ventilation of the environment , changing clothes upon arrival home ,taking a shower upon arrival home	mask, gloves, face protective shield, bonnet, frequent hand-washing , frequent hand antiseptic	asked whether the patient had symptoms, such as fever, cough, or shortness of breath, rinsed the mouth with a mouthwash containing chlorhexidin, postponed appointments of potentially infected patients for at least 14 days	Yes	Undecided	Yes	No	prosthesis	Yes	No
5	Female	Yes	No	No	No	Websites or social media accounts of professional organizations, such as the Ministry of Health, Dental Association, and WHO	mask, frequent hand-washing , Use of cologne, wet wipes, and hand disinfectant , not entering public areas , not having physical contact (handshaking, kissing, etc.) , frequent ventilation of the environment , changing clothes upon arrival home	mask, gloves, face protective shield, frequent hand-washing , frequent hand antiseptic	asked whether the patient had symptoms, such as fever, cough, or shortness of breath, applied a rubber dam, used a strong saliva absorber during the procedure, avoided aerosols and processes that would create droplets, preferring to use hand tools instead of an aerator, cavitron, or micromotor, postponed appointments of potentially infected patients for at least 14 days	Yes	Yes	Yes	Yes	endodontics	Yes	No
5	Female	No	No	No	No	Websites or social media accounts of professional organizations, such as the Ministry of Health, Dental Association, and WHO, Physicians’ individual websites or social media accounts, Social media accounts, like Instagram, Facebook, and Twitter, Television and radio programs	gloves, mask, frequent hand-washing , Use of cologne, wet wipes, and hand disinfectant , not entering public areas , not having physical contact (handshaking, kissing, etc.) , frequent ventilation of the environment , changing clothes upon arrival home ,taking a shower upon arrival home	mask, gloves, safety glasses, face protective shield, bonnet, frequent hand-washing , frequent hand antiseptic	asked whether the patient had symptoms, such as fever, cough, or shortness of breath, measured the patient’s fever, rinsed the mouth with a mouthwash containing chlorhexidin, used a strong saliva absorber during the procedure, avoided aerosols and processes that would create droplets, preferring to use hand tools instead of an aerator, cavitron, or micromotor, postponed appointments of potentiall…	Yes	Yes	Yes	No	oral diagnosis and radiology	Yes	No
3	Male	No	No	I don’t know	No	Websites or social media accounts of professional organizations, such as the Ministry of Health, Dental Association, and WHO, Social media accounts, like Instagram, Facebook, and Twitter, Television and radio programs, Communication groups, such as Whatsapp or Line.	frequent hand-washing , Use of cologne, wet wipes, and hand disinfectant , not entering public areas , not having physical contact (handshaking, kissing, etc.) , frequent ventilation of the environment , changing clothes upon arrival home	Stajlar iptal oldu.	3. Sınıfım ve hasta bakmadık.	Yes	Yes	Yes	Undecided	endodontics	Yes	No
3	Male	No	No	Yes	No	Television and radio programs	gloves, mask, frequent hand-washing , Use of cologne, wet wipes, and hand disinfectant , not entering public areas , not having physical contact (handshaking, kissing, etc.)	mask, gloves, frequent hand-washing , frequent hand antiseptic	asked whether the patient had symptoms, such as fever, cough, or shortness of breath, measured the patient’s fever, applied a rubber dam, rinsed the mouth with a mouthwash containing chlorhexidin, ,, ,, used a strong saliva absorber during the procedure, ,, avoided aerosols and processes that would create droplets, postponed appointments of potentially infected patients for at least 14 days	Yes	Yes	Yes	Yes	endodontics	No	No
4	Male	No	I don’t know	No	Yes	Television and radio programs	frequent hand-washing , Use of cologne, wet wipes, and hand disinfectant , not entering public areas , not having physical contact (handshaking, kissing, etc.) , frequent ventilation of the environment , changing clothes upon arrival home	mask, gloves, face protective shield, frequent hand-washing , frequent hand antiseptic	asked whether the patient had symptoms, such as fever, cough, or shortness of breath, used a strong saliva absorber during the procedure	Yes	Yes	Yes	No	endodontics	Yes	No
3	Male	Yes	No	No	No	Websites or social media accounts of professional organizations, such as the Ministry of Health, Dental Association, and WHO, Published scientific articles, Physicians’ individual websites or social media accounts, Social media accounts, like Instagram, Facebook, and Twitter	mask, frequent hand-washing , Use of cologne, wet wipes, and hand disinfectant , not entering public areas , not having physical contact (handshaking, kissing, etc.) , frequent ventilation of the environment , changing clothes upon arrival home ,taking a shower upon arrival home	mask, gloves, frequent hand-washing , frequent hand antiseptic	asked whether the patient had symptoms, such as fever, cough, or shortness of breath, measured the patient’s fever, applied a rubber dam, rinsed the mouth with a mouthwash containing chlorhexidin, avoided aerosols and processes that would create droplets, postponed appointments of potentially infected patients for at least 14 days	Yes	Yes	Yes	Yes	endodontics	Yes	Yes
3	Male	Yes	No	I don’t know	No	Physicians’ individual websites or social media accounts, Television and radio programs	not entering public areas	mask, gloves	asked whether the patient had symptoms, such as fever, cough, or shortness of breath, measured the patient’s fever	Yes	Yes	Yes	Yes	pedodontics	Yes	No
3	Female	No	No	No	No	Websites or social media accounts of professional organizations, such as the Ministry of Health, Dental Association, and WHO, From information meetings held in institutions, Physicians’ individual websites or social media accounts, Social media accounts, like Instagram, Facebook, and Twitter, Television and radio programs, Communication groups, such as Whatsapp or Line.	mask, frequent hand-washing , Use of cologne, wet wipes, and hand disinfectant , not entering public areas , not having physical contact (handshaking, kissing, etc.) , frequent ventilation of the environment , changing clothes upon arrival home ,taking a shower upon arrival home	mask, gloves, frequent hand-washing , frequent hand antiseptic, Henüz hasta almıyoruz	Henüz hasta almıyoruz	Yes	Yes	Yes	Yes	oral and maxillofacial surgery	Yes	No
3	Female	No	No	No	Yes	Websites or social media accounts of professional organizations, such as the Ministry of Health, Dental Association, and WHO, Social media accounts, like Instagram, Facebook, and Twitter, Television and radio programs	frequent hand-washing , Use of cologne, wet wipes, and hand disinfectant , not entering public areas , not having physical contact (handshaking, kissing, etc.) , frequent ventilation of the environment , changing clothes upon arrival home	mask, gloves, frequent hand-washing , frequent hand antiseptic	asked whether the patient had symptoms, such as fever, cough, or shortness of breath	Yes	Yes	Yes	Undecided	endodontics	Yes	Undecided
4	Male	No	No	I don’t know	No	Websites or social media accounts of professional organizations, such as the Ministry of Health, Dental Association, and WHO, Social media accounts, like Instagram, Facebook, and Twitter, Television and radio programs	gloves, mask, frequent hand-washing , Use of cologne, wet wipes, and hand disinfectant , not entering public areas , not having physical contact (handshaking, kissing, etc.) , frequent ventilation of the environment , changing clothes upon arrival home ,taking a shower upon arrival home	mask, gloves, face protective shield, bonnet, Tek kullanımlık box önlüğü, frequent hand-washing , frequent hand antiseptic	asked whether the patient had symptoms, such as fever, cough, or shortness of breath, postponed appointments of potentially infected patients for at least 14 days	Yes	Yes	Yes	Undecided	prosthesis	Yes	No
3	Male	No	No	I don’t know	No	Social media accounts, like Instagram, Facebook, and Twitter, Television and radio programs, Communication groups, such as Whatsapp or Line.	frequent hand-washing , not entering public areas , not having physical contact (handshaking, kissing, etc.) , frequent ventilation of the environment , changing clothes upon arrival home	mask, gloves, frequent hand-washing	None	Undecided	Undecided	Yes	Undecided	oral and maxillofacial surgery	Yes	No
5	Female	No	No	No	No	Websites or social media accounts of professional organizations, such as the Ministry of Health, Dental Association, and WHO, Published scientific articles, Physicians’ individual websites or social media accounts, Social media accounts, like Instagram, Facebook, and Twitter	frequent hand-washing , Use of cologne, wet wipes, and hand disinfectant , not entering public areas , not having physical contact (handshaking, kissing, etc.) , changing clothes upon arrival home ,taking a shower upon arrival home	mask, gloves, face protective shield, bonnet, frequent hand-washing , frequent hand antiseptic	None	Yes	Yes	Yes	No	prosthesis	Yes	No
3	Female	Yes	Yes	No	Yes	Websites or social media accounts of professional organizations, such as the Ministry of Health, Dental Association, and WHO, Physicians’ individual websites or social media accounts, Social media accounts, like Instagram, Facebook, and Twitter, Television and radio programs, Communication groups, such as Whatsapp or Line.	frequent hand-washing , Use of cologne, wet wipes, and hand disinfectant , not entering public areas , not having physical contact (handshaking, kissing, etc.) , frequent ventilation of the environment , changing clothes upon arrival home	mask, gloves, face protective shield, bonnet, frequent hand-washing , frequent hand antiseptic	asked whether the patient had symptoms, such as fever, cough, or shortness of breath, applied a rubber dam, used a strong saliva absorber during the procedure, avoided aerosols and processes that would create droplets, postponed appointments of potentially infected patients for at least 14 days	Yes	Yes	Yes	Yes	oral and maxillofacial surgery	Yes	No
3	Male	No	No	No	No	From information meetings held in institutions, Published scientific articles, Social media accounts, like Instagram, Facebook, and Twitter, Television and radio programs, Communication groups, such as Whatsapp or Line.	frequent hand-washing , Use of cologne, wet wipes, and hand disinfectant , not entering public areas , not having physical contact (handshaking, kissing, etc.)	mask, gloves, frequent hand-washing , frequent hand antiseptic	None	Yes	Yes	Yes	Yes	periodontology	Yes	No
3	Male	No	No	No	No	Websites or social media accounts of professional organizations, such as the Ministry of Health, Dental Association, and WHO, Physicians’ individual websites or social media accounts, Social media accounts, like Instagram, Facebook, and Twitter, Television and radio programs	gloves, mask, frequent hand-washing , Use of cologne, wet wipes, and hand disinfectant , not entering public areas , not having physical contact (handshaking, kissing, etc.) , frequent ventilation of the environment , changing clothes upon arrival home ,taking a shower upon arrival home	mask, gloves, face protective shield, bonnet, frequent hand-washing , frequent hand antiseptic	asked whether the patient had symptoms, such as fever, cough, or shortness of breath, measured the patient’s fever, avoided aerosols and processes that would create droplets, postponed appointments of potentially infected patients for at least 14 days	Yes	Yes	Yes	No	prosthesis	Yes	Yes
3	Male	No	No	No	No	Television and radio programs	mask, frequent hand-washing , Use of cologne, wet wipes, and hand disinfectant , not entering public areas , not having physical contact (handshaking, kissing, etc.)	None	asked whether the patient had symptoms, such as fever, cough, or shortness of breath, applied a rubber dam, avoided aerosols and processes that would create droplets, postponed appointments of potentially infected patients for at least 14 days	Yes	Yes	Yes	Yes	oral and maxillofacial surgery	Yes	Undecided
5	Male	Yes	No	Yes	No	Websites or social media accounts of professional organizations, such as the Ministry of Health, Dental Association, and WHO, Published scientific articles, Physicians’ individual websites or social media accounts, Social media accounts, like Instagram, Facebook, and Twitter, Television and radio programs	gloves, mask, frequent hand-washing , Use of cologne, wet wipes, and hand disinfectant , not entering public areas , not having physical contact (handshaking, kissing, etc.) , frequent ventilation of the environment , changing clothes upon arrival home ,taking a shower upon arrival home	mask, gloves	None	Yes	Yes	Yes	No	pedodontics	Yes	No
3	Female	No	No	No	No	Websites or social media accounts of professional organizations, such as the Ministry of Health, Dental Association, and WHO, From information meetings held in institutions, Published scientific articles, Physicians’ individual websites or social media accounts, Social media accounts, like Instagram, Facebook, and Twitter, Television and radio programs, Communication groups, such as Whatsapp or L…	frequent hand-washing , Use of cologne, wet wipes, and hand disinfectant , not entering public areas , not having physical contact (handshaking, kissing, etc.) , frequent ventilation of the environment , changing clothes upon arrival home	bonnet, frequent hand-washing , frequent hand antiseptic	asked whether the patient had symptoms, such as fever, cough, or shortness of breath, measured the patient’s fever, applied a rubber dam, rinsed the mouth with a mouthwash containing chlorhexidin, ,, ,, used a strong saliva absorber during the procedure, ,, avoided aerosols and processes that would create droplets, preferring to use hand tools instead of an aerator, cavitron, or micromotor, postp…	Undecided	Yes	Yes	Undecided	endodontics	Yes	Undecided
5	Female	No	No	Yes	No	Websites or social media accounts of professional organizations, such as the Ministry of Health, Dental Association, and WHO, Physicians’ individual websites or social media accounts, Television and radio programs, Communication groups, such as Whatsapp or Line.	frequent hand-washing , Use of cologne, wet wipes, and hand disinfectant , not entering public areas , frequent ventilation of the environment	mask, face protective shield, frequent hand-washing , frequent hand antiseptic	None	Yes	Yes	Yes	Yes	prosthesis	Yes	No
3	Male	No	No	No	No	From information meetings held in institutions, Social media accounts, like Instagram, Facebook, and Twitter, Television and radio programs	frequent hand-washing , Use of cologne, wet wipes, and hand disinfectant , not entering public areas , not having physical contact (handshaking, kissing, etc.)	mask, gloves, frequent hand-washing , frequent hand antiseptic	asked whether the patient had symptoms, such as fever, cough, or shortness of breath, measured the patient’s fever, applied a rubber dam, rinsed the mouth with a mouthwash containing chlorhexidin	Yes	Yes	Yes	Yes	endodontics	Undecided	No
3	Female	No	No	I don’t know	No	Websites or social media accounts of professional organizations, such as the Ministry of Health, Dental Association, and WHO, From information meetings held in institutions, Published scientific articles, Physicians’ individual websites or social media accounts, Social media accounts, like Instagram, Facebook, and Twitter, Television and radio programs, Communication groups, such as Whatsapp or L…	frequent hand-washing , Use of cologne, wet wipes, and hand disinfectant , not entering public areas , not having physical contact (handshaking, kissing, etc.) , frequent ventilation of the environment , changing clothes upon arrival home ,taking a shower upon arrival home	mask, gloves, frequent hand-washing , frequent hand antiseptic	asked whether the patient had symptoms, such as fever, cough, or shortness of breath, used a strong saliva absorber during the procedure, postponed appointments of potentially infected patients for at least 14 days	Yes	Yes	Yes	No	restorative dentistry	Yes	No
3	Male	No	No	I don’t know	No	Websites or social media accounts of professional organizations, such as the Ministry of Health, Dental Association, and WHO, Social media accounts, like Instagram, Facebook, and Twitter, Television and radio programs, Communication groups, such as Whatsapp or Line.	frequent hand-washing , Use of cologne, wet wipes, and hand disinfectant , not entering public areas , not having physical contact (handshaking, kissing, etc.) , frequent ventilation of the environment , changing clothes upon arrival home	Stajlar iptal oldu.	3. Sınıfım ve hasta bakmadık.	Yes	Yes	Yes	Undecided	endodontics	Yes	No
1	Female	Yes	No	I don’t know	No	Websites or social media accounts of professional organizations, such as the Ministry of Health, Dental Association, and WHO, From information meetings held in institutions, Published scientific articles, Social media accounts, like Instagram, Facebook, and Twitter, Television and radio programs	gloves, mask, frequent hand-washing , Use of cologne, wet wipes, and hand disinfectant , not entering public areas , not having physical contact (handshaking, kissing, etc.)	mask, gloves, safety glasses, frequent hand-washing , frequent hand antiseptic	asked whether the patient had symptoms, such as fever, cough, or shortness of breath	Yes	Yes	No	Undecided	oral and maxillofacial surgery	Undecided	No
1	Female	No	No	No	No	Websites or social media accounts of professional organizations, such as the Ministry of Health, Dental Association, and WHO, From information meetings held in institutions, Published scientific articles, Physicians’ individual websites or social media accounts, Social media accounts, like Instagram, Facebook, and Twitter, Television and radio programs, Communication groups, such as Whatsapp or L…	gloves, mask, frequent hand-washing , Use of cologne, wet wipes, and hand disinfectant , not entering public areas , not having physical contact (handshaking, kissing, etc.) , frequent ventilation of the environment , changing clothes upon arrival home	mask	asked whether the patient had symptoms, such as fever, cough, or shortness of breath, measured the patient’s fever, avoided aerosols and processes that would create droplets	Yes	Yes	Yes	Yes	oral and maxillofacial surgery	Yes	No
1	Female	No	I don’t know	No	No	Television and radio programs	not entering public areas , not having physical contact (handshaking, kissing, etc.) , frequent ventilation of the environment	None	None	Yes	Yes	Yes	Yes	oral and maxillofacial surgery	Undecided	No
1	Male	No	No	I don’t know	No	Television and radio programs, Communication groups, such as Whatsapp or Line.	frequent hand-washing , not entering public areas , changing clothes upon arrival home	None	None	Yes	Yes	Yes	No	oral and maxillofacial surgery	Yes	No
1	Male	No	No	No	No	Social media accounts, like Instagram, Facebook, and Twitter	gloves, mask, frequent hand-washing , Use of cologne, wet wipes, and hand disinfectant , not entering public areas , not having physical contact (handshaking, kissing, etc.) , frequent ventilation of the environment	None	None	No	Undecided	Yes	No	oral and maxillofacial surgery	Undecided	No
1	Male	No	No	Yes	No	Websites or social media accounts of professional organizations, such as the Ministry of Health, Dental Association, and WHO, From information meetings held in institutions, Physicians’ individual websites or social media accounts, Social media accounts, like Instagram, Facebook, and Twitter, Television and radio programs, Communication groups, such as Whatsapp or Line.	frequent hand-washing , Use of cologne, wet wipes, and hand disinfectant , not having physical contact (handshaking, kissing, etc.) , frequent ventilation of the environment , changing clothes upon arrival home	frequent hand-washing , frequent hand antiseptic	None	Yes	Yes	Yes	No	endodontics	Yes	No
1	Female	No	No	I don’t know	No	Websites or social media accounts of professional organizations, such as the Ministry of Health, Dental Association, and WHO, Social media accounts, like Instagram, Facebook, and Twitter, Television and radio programs	frequent hand-washing , not entering public areas , not having physical contact (handshaking, kissing, etc.) , frequent ventilation of the environment , changing clothes upon arrival home	mask, gloves, face protective shield, bonnet, frequent hand-washing , frequent hand antiseptic	asked whether the patient had symptoms, such as fever, cough, or shortness of breath, rinsed the mouth with a mouthwash containing chlorhexidin	Yes	Yes	Yes	Yes	periodontology	Yes	No
3	Male	No	No	No	No	Websites or social media accounts of professional organizations, such as the Ministry of Health, Dental Association, and WHO, Social media accounts, like Instagram, Facebook, and Twitter, Television and radio programs	frequent hand-washing , not entering public areas , not having physical contact (handshaking, kissing, etc.) , frequent ventilation of the environment	mask, frequent hand-washing , frequent hand antiseptic	asked whether the patient had symptoms, such as fever, cough, or shortness of breath, measured the patient’s fever, avoided aerosols and processes that would create droplets, preferring to use hand tools instead of an aerator, cavitron, or micromotor, postponed appointments of potentially infected patients for at least 14 days	Yes	Yes	Yes	Yes	prosthesis	Yes	No
1	Male	Yes	No	I don’t know	No	Websites or social media accounts of professional organizations, such as the Ministry of Health, Dental Association, and WHO, From information meetings held in institutions, Published scientific articles, Social media accounts, like Instagram, Facebook, and Twitter, Television and radio programs	mask, frequent hand-washing , Use of cologne, wet wipes, and hand disinfectant , not entering public areas , not having physical contact (handshaking, kissing, etc.) , frequent ventilation of the environment , changing clothes upon arrival home ,taking a shower upon arrival home	mask, gloves, frequent hand-washing , frequent hand antiseptic	asked whether the patient had symptoms, such as fever, cough, or shortness of breath, measured the patient’s fever, postponed appointments of potentially infected patients for at least 14 days	Yes	Yes	Yes	No	oral and maxillofacial surgery	Yes	No
1	Female	No	I don’t know	I don’t know	No	Websites or social media accounts of professional organizations, such as the Ministry of Health, Dental Association, and WHO, Physicians’ individual websites or social media accounts, Social media accounts, like Instagram, Facebook, and Twitter	frequent hand-washing , Use of cologne, wet wipes, and hand disinfectant , not entering public areas , not having physical contact (handshaking, kissing, etc.) , frequent ventilation of the environment , changing clothes upon arrival home	Staj yapmıyorum.	Hasta ile ilgilenmiyoruz.	Yes	Yes	Yes	Undecided	oral and maxillofacial surgery	Yes	No
1	Female	No	Yes	No	No	Websites or social media accounts of professional organizations, such as the Ministry of Health, Dental Association, and WHO, Published scientific articles, Physicians’ individual websites or social media accounts, Social media accounts, like Instagram, Facebook, and Twitter	gloves, mask, frequent hand-washing , Use of cologne, wet wipes, and hand disinfectant , not entering public areas , not having physical contact (handshaking, kissing, etc.) , frequent ventilation of the environment , changing clothes upon arrival home	staj yapmıyorum	staj yapmıyorum	Yes	Yes	Yes	No	oral and maxillofacial surgery	Yes	No
1	Male	Yes	No	I don’t know	No	Websites or social media accounts of professional organizations, such as the Ministry of Health, Dental Association, and WHO, Social media accounts, like Instagram, Facebook, and Twitter, Television and radio programs, Communication groups, such as Whatsapp or Line.	mask, frequent hand-washing , Use of cologne, wet wipes, and hand disinfectant , not entering public areas , not having physical contact (handshaking, kissing, etc.)	mask, FFP3/N95 mask, gloves, frequent hand-washing , frequent hand antiseptic	asked whether the patient had symptoms, such as fever, cough, or shortness of breath	Yes	Undecided	Yes	No	oral and maxillofacial surgery	Yes	No
1	Male	No	I don’t know	I don’t know	No	Social media accounts, like Instagram, Facebook, and Twitter	Use of cologne, wet wipes, and hand disinfectant , not entering public areas , frequent ventilation of the environment , changing clothes upon arrival home ,taking a shower upon arrival home	None	None	No	No	No	No	orthodontics	No	No
1	Female	No	No	I don’t know	No	Websites or social media accounts of professional organizations, such as the Ministry of Health, Dental Association, and WHO, Physicians’ individual websites or social media accounts, Social media accounts, like Instagram, Facebook, and Twitter, Television and radio programs	frequent hand-washing , Use of cologne, wet wipes, and hand disinfectant , not entering public areas , not having physical contact (handshaking, kissing, etc.) , frequent ventilation of the environment , changing clothes upon arrival home ,taking a shower upon arrival home	frequent hand-washing , frequent hand antiseptic	1.sınıf olduğum için diş tedavisi yapmıyorum	Yes	Yes	Yes	No	oral and maxillofacial surgery	Yes	No
1	Female	No	I don’t know	Yes	No	Websites or social media accounts of professional organizations, such as the Ministry of Health, Dental Association, and WHO, Physicians’ individual websites or social media accounts, Social media accounts, like Instagram, Facebook, and Twitter	gloves, mask, frequent hand-washing , not entering public areas , not having physical contact (handshaking, kissing, etc.) , frequent ventilation of the environment , changing clothes upon arrival home	None	None	Yes	Yes	Yes	Yes	endodontics	Yes	No
1	Male	No	No	I don’t know	No	Websites or social media accounts of professional organizations, such as the Ministry of Health, Dental Association, and WHO, Physicians’ individual websites or social media accounts, Social media accounts, like Instagram, Facebook, and Twitter, Television and radio programs, Communication groups, such as Whatsapp or Line.	mask, frequent hand-washing , Use of cologne, wet wipes, and hand disinfectant , not entering public areas , not having physical contact (handshaking, kissing, etc.) , frequent ventilation of the environment , changing clothes upon arrival home ,taking a shower upon arrival home	None	None	Yes	Undecided	Undecided	Undecided	orthodontics	Undecided	No
1	Male	No	No	No	No	Websites or social media accounts of professional organizations, such as the Ministry of Health, Dental Association, and WHO, From information meetings held in institutions, Social media accounts, like Instagram, Facebook, and Twitter, Television and radio programs	frequent hand-washing , not entering public areas , not having physical contact (handshaking, kissing, etc.) , Ekstra yaptığım bişey yok	mask, safety glasses	asked whether the patient had symptoms, such as fever, cough, or shortness of breath, measured the patient’s fever	Yes	Undecided	Undecided	No	oral and maxillofacial surgery	Yes	Undecided
1	Male	Yes	No	Yes	No	Websites or social media accounts of professional organizations, such as the Ministry of Health, Dental Association, and WHO, From information meetings held in institutions, Published scientific articles, Physicians’ individual websites or social media accounts, Social media accounts, like Instagram, Facebook, and Twitter, Television and radio programs, Communication groups, such as Whatsapp or L…	frequent hand-washing , Use of cologne, wet wipes, and hand disinfectant , not entering public areas , not having physical contact (handshaking, kissing, etc.) , frequent ventilation of the environment , changing clothes upon arrival home ,taking a shower upon arrival home	None	None	Yes	Yes	Yes	Yes	endodontics	Yes	Undecided
2	Male	No	No	I don’t know	No	Bilgi edinmedim	frequent hand-washing , Use of cologne, wet wipes, and hand disinfectant , not entering public areas , not having physical contact (handshaking, kissing, etc.) , frequent ventilation of the environment , changing clothes upon arrival home ,taking a shower upon arrival home	None	None	Yes	Yes	Yes	Undecided	oral and maxillofacial surgery	Undecided	No
2	Male	No	No	No	No	Websites or social media accounts of professional organizations, such as the Ministry of Health, Dental Association, and WHO, Social media accounts, like Instagram, Facebook, and Twitter, Television and radio programs, Communication groups, such as Whatsapp or Line.	gloves, mask, frequent hand-washing , Use of cologne, wet wipes, and hand disinfectant , not entering public areas , not having physical contact (handshaking, kissing, etc.) , frequent ventilation of the environment ,taking a shower upon arrival home	mask, gloves, frequent hand-washing , frequent hand antiseptic	asked whether the patient had symptoms, such as fever, cough, or shortness of breath, preferring to use hand tools instead of an aerator, cavitron, or micromotor, postponed appointments of potentially infected patients for at least 14 days	Yes	Yes	Yes	Yes	periodontology	Yes	No
1	Female	No	No	I don’t know	No	Published scientific articles	frequent hand-washing	frequent hand-washing	None	Yes	Yes	Yes	Yes	prosthesis	Yes	No
2	Female	No	No	Yes	No	Social media accounts, like Instagram, Facebook, and Twitter	gloves, mask, frequent hand-washing , Use of cologne, wet wipes, and hand disinfectant , not entering public areas , not having physical contact (handshaking, kissing, etc.)	None	asked whether the patient had symptoms, such as fever, cough, or shortness of breath, measured the patient’s fever, postponed appointments of potentially infected patients for at least 14 days	Yes	No	No	Yes	pedodontics	Yes	Yes
1	Female	No	No	I don’t know	No	Websites or social media accounts of professional organizations, such as the Ministry of Health, Dental Association, and WHO, Physicians’ individual websites or social media accounts, Social media accounts, like Instagram, Facebook, and Twitter, Television and radio programs	frequent hand-washing , Use of cologne, wet wipes, and hand disinfectant , not entering public areas , not having physical contact (handshaking, kissing, etc.) , frequent ventilation of the environment , changing clothes upon arrival home ,taking a shower upon arrival home	mask, gloves, safety glasses, bonnet, Tek kullanımlık box önlüğü, frequent hand-washing , Henüz staja girmedim ama girseydim yapacaklarımı işaretledim.	asked whether the patient had symptoms, such as fever, cough, or shortness of breath, measured the patient’s fever, rinsed the mouth with a mouthwash containing chlorhexidin, postponed appointments of potentially infected patients for at least 14 days, Henüz hasta bakmadım ama baksaydım yapacağım uygulamaları işaretledim.	Yes	Yes	Yes	No	endodontics	Yes	No
4	Male	No	No	No	No	Websites or social media accounts of professional organizations, such as the Ministry of Health, Dental Association, and WHO, Social media accounts, like Instagram, Facebook, and Twitter, Television and radio programs	frequent hand-washing , Use of cologne, wet wipes, and hand disinfectant , not entering public areas , not having physical contact (handshaking, kissing, etc.)	mask, gloves, face protective shield, bonnet, Tek kullanımlık box önlüğü, frequent hand antiseptic	asked whether the patient had symptoms, such as fever, cough, or shortness of breath, rinsed the mouth with a mouthwash containing chlorhexidin, used a strong saliva absorber during the procedure, avoided aerosols and processes that would create droplets, preferring to use hand tools instead of an aerator, cavitron, or micromotor	No	Yes	Yes	No	oral diagnosis and radiology	Yes	No
1	Female	No	No	Yes	No	Websites or social media accounts of professional organizations, such as the Ministry of Health, Dental Association, and WHO	mask, frequent hand-washing , Use of cologne, wet wipes, and hand disinfectant , not entering public areas , not having physical contact (handshaking, kissing, etc.) , frequent ventilation of the environment , changing clothes upon arrival home ,taking a shower upon arrival home	None	avoided aerosols and processes that would create droplets, preferring to use hand tools instead of an aerator, cavitron, or micromotor	Yes	Yes	Yes	No	oral and maxillofacial surgery	Yes	No
2	Male	No	No	No	No	Websites or social media accounts of professional organizations, such as the Ministry of Health, Dental Association, and WHO, From information meetings held in institutions, Published scientific articles	gloves, mask, frequent hand-washing , Use of cologne, wet wipes, and hand disinfectant , not entering public areas , not having physical contact (handshaking, kissing, etc.) , frequent ventilation of the environment , changing clothes upon arrival home ,taking a shower upon arrival home	mask, gloves, safety glasses, face protective shield, bonnet, frequent hand-washing , frequent hand antiseptic	asked whether the patient had symptoms, such as fever, cough, or shortness of breath, measured the patient’s fever, applied a rubber dam, rinsed the mouth with a mouthwash containing chlorhexidin, avoided aerosols and processes that would create droplets	Yes	Yes	Yes	No	prosthesis	Yes	Yes
2	Female	No	I don’t know	No	Yes	Websites or social media accounts of professional organizations, such as the Ministry of Health, Dental Association, and WHO, From information meetings held in institutions, Published scientific articles, Physicians’ individual websites or social media accounts, Social media accounts, like Instagram, Facebook, and Twitter, Television and radio programs, Communication groups, such as Whatsapp or L…	gloves, mask, frequent hand-washing , Use of cologne, wet wipes, and hand disinfectant , not entering public areas , not having physical contact (handshaking, kissing, etc.) , frequent ventilation of the environment , changing clothes upon arrival home ,taking a shower upon arrival home	mask, FFP3/N95 mask, gloves, safety glasses, face protective shield, bonnet, frequent hand-washing , frequent hand antiseptic	asked whether the patient had symptoms, such as fever, cough, or shortness of breath, measured the patient’s fever, applied a rubber dam, rinsed the mouth with a mouthwash containing chlorhexidin, postponed appointments of potentially infected patients for at least 14 days	Yes	Yes	Yes	No	oral and maxillofacial surgery	Undecided	Undecided
1	Male	No	No	Yes	No	Websites or social media accounts of professional organizations, such as the Ministry of Health, Dental Association, and WHO, From information meetings held in institutions, Social media accounts, like Instagram, Facebook, and Twitter, Television and radio programs, Mynet bazı internet siteleri	gloves, mask, frequent hand-washing , Use of cologne, wet wipes, and hand disinfectant , not entering public areas , not having physical contact (handshaking, kissing, etc.) , frequent ventilation of the environment , changing clothes upon arrival home ,taking a shower upon arrival home	Hasta bakmıyoruz	Hasta bakmıyoruz	Yes	Yes	Yes	No	oral and maxillofacial surgery	Yes	Undecided
1	Female	No	No	Yes	No	Social media accounts, like Instagram, Facebook, and Twitter	gloves, mask, frequent hand-washing , not entering public areas , changing clothes upon arrival home ,taking a shower upon arrival home	None	asked whether the patient had symptoms, such as fever, cough, or shortness of breath, measured the patient’s fever	Undecided	No	Yes	No	orthodontics	Undecided	No
1	Male	Yes	No	No	No	From information meetings held in institutions, Physicians’ individual websites or social media accounts, Social media accounts, like Instagram, Facebook, and Twitter, Television and radio programs, Communication groups, such as Whatsapp or Line.	gloves, frequent hand-washing , Use of cologne, wet wipes, and hand disinfectant , not entering public areas , not having physical contact (handshaking, kissing, etc.) , frequent ventilation of the environment	FFP3/N95 mask, gloves, frequent hand-washing	asked whether the patient had symptoms, such as fever, cough, or shortness of breath	Yes	Yes	Yes	No	endodontics	Undecided	Undecided
2	Male	No	I don’t know	No	No	Websites or social media accounts of professional organizations, such as the Ministry of Health, Dental Association, and WHO, From information meetings held in institutions, Social media accounts, like Instagram, Facebook, and Twitter, Television and radio programs, Communication groups, such as Whatsapp or Line.	frequent hand-washing , Use of cologne, wet wipes, and hand disinfectant , not entering public areas , not having physical contact (handshaking, kissing, etc.) , frequent ventilation of the environment	mask, FFP3/N95 mask, gloves, safety glasses, face protective shield, bonnet, frequent hand-washing , frequent hand antiseptic	asked whether the patient had symptoms, such as fever, cough, or shortness of breath, applied a rubber dam, rinsed the mouth with a mouthwash containing chlorhexidin, ,, ,, avoided aerosols and processes that would create droplets, preferring to use hand tools instead of an aerator, cavitron, or micromotor	Yes	Yes	Yes	Yes	periodontology	Yes	No
2	Female	No	No	I don’t know	Yes	Websites or social media accounts of professional organizations, such as the Ministry of Health, Dental Association, and WHO, Published scientific articles, Physicians’ individual websites or social media accounts, Social media accounts, like Instagram, Facebook, and Twitter	frequent hand-washing , Use of cologne, wet wipes, and hand disinfectant , not entering public areas , not having physical contact (handshaking, kissing, etc.) , frequent ventilation of the environment , changing clothes upon arrival home	mask, gloves, safety glasses, face protective shield, bonnet, frequent hand-washing , frequent hand antiseptic	asked whether the patient had symptoms, such as fever, cough, or shortness of breath, measured the patient’s fever, applied a rubber dam, avoided aerosols and processes that would create droplets, preferring to use hand tools instead of an aerator, cavitron, or micromotor, postponed appointments of potentially infected patients for at least 14 days	Yes	Yes	Yes	Yes	oral and maxillofacial surgery	Yes	No
2	Female	No	No	No	No	Websites or social media accounts of professional organizations, such as the Ministry of Health, Dental Association, and WHO, Published scientific articles, Physicians’ individual websites or social media accounts, Social media accounts, like Instagram, Facebook, and Twitter, Television and radio programs	gloves, mask, frequent hand-washing , Use of cologne, wet wipes, and hand disinfectant , not entering public areas , not having physical contact (handshaking, kissing, etc.) , frequent ventilation of the environment , changing clothes upon arrival home ,taking a shower upon arrival home	mask, gloves, frequent hand-washing , frequent hand antiseptic	asked whether the patient had symptoms, such as fever, cough, or shortness of breath, measured the patient’s fever, applied a rubber dam, rinsed the mouth with a mouthwash containing chlorhexidin, ,, ,, used a strong saliva absorber during the procedure, ,, avoided aerosols and processes that would create droplets, preferring to use hand tools instead of an aerator, cavitron, or micromotor, postp…	Yes	Yes	Yes	No	periodontology	Yes	No
1	Female	Yes	No	Yes	No	Websites or social media accounts of professional organizations, such as the Ministry of Health, Dental Association, and WHO, Physicians’ individual websites or social media accounts, Social media accounts, like Instagram, Facebook, and Twitter, Television and radio programs	gloves, mask, frequent hand-washing , Use of cologne, wet wipes, and hand disinfectant , not entering public areas , not having physical contact (handshaking, kissing, etc.) , frequent ventilation of the environment , changing clothes upon arrival home , Sürekli evdeyim	Stajım yok	Diş tedavisi yapmıyorum	Yes	Yes	Yes	Yes	oral and maxillofacial surgery	Yes	No
2	Female	No	No	I don’t know	Yes	Bilgi edinmedim	gloves, frequent hand-washing , Use of cologne, wet wipes, and hand disinfectant , not entering public areas , not having physical contact (handshaking, kissing, etc.) , frequent ventilation of the environment , changing clothes upon arrival home	gloves, frequent hand-washing , frequent hand antiseptic	asked whether the patient had symptoms, such as fever, cough, or shortness of breath, measured the patient’s fever	Yes	Yes	Yes	Yes	endodontics	Yes	No
2	Female	No	No	Yes	Yes	Websites or social media accounts of professional organizations, such as the Ministry of Health, Dental Association, and WHO, Physicians’ individual websites or social media accounts, Social media accounts, like Instagram, Facebook, and Twitter, Television and radio programs, Communication groups, such as Whatsapp or Line.	gloves, mask, frequent hand-washing , Use of cologne, wet wipes, and hand disinfectant , not entering public areas , not having physical contact (handshaking, kissing, etc.) , frequent ventilation of the environment , changing clothes upon arrival home	mask, gloves, safety glasses, face protective shield, Tek kullanımlık box önlüğü, frequent hand-washing , frequent hand antiseptic	asked whether the patient had symptoms, such as fever, cough, or shortness of breath, measured the patient’s fever	Yes	Yes	Yes	Undecided	endodontics	Yes	No
2	Male	No	No	I don’t know	No	Websites or social media accounts of professional organizations, such as the Ministry of Health, Dental Association, and WHO, From information meetings held in institutions, Published scientific articles, Physicians’ individual websites or social media accounts, Social media accounts, like Instagram, Facebook, and Twitter, Television and radio programs	frequent hand-washing , Use of cologne, wet wipes, and hand disinfectant , not entering public areas , not having physical contact (handshaking, kissing, etc.) , frequent ventilation of the environment , changing clothes upon arrival home	FFP3/N95 mask, gloves, safety glasses, face protective shield, bonnet, frequent hand-washing , frequent hand antiseptic	asked whether the patient had symptoms, such as fever, cough, or shortness of breath, measured the patient’s fever, applied a rubber dam	Yes	Yes	Yes	Yes	oral and maxillofacial surgery	Yes	No
1	Male	Yes	No	I don’t know	No	Websites or social media accounts of professional organizations, such as the Ministry of Health, Dental Association, and WHO	gloves, mask, frequent hand-washing , Use of cologne, wet wipes, and hand disinfectant , not entering public areas , not having physical contact (handshaking, kissing, etc.) , frequent ventilation of the environment , changing clothes upon arrival home	mask, FFP3/N95 mask, gloves, frequent hand-washing , frequent hand antiseptic	None	No	Yes	Yes	No	restorative dentistry	Undecided	No
1	Female	Yes	Yes	No	Yes	Websites or social media accounts of professional organizations, such as the Ministry of Health, Dental Association, and WHO, Social media accounts, like Instagram, Facebook, and Twitter, Television and radio programs, Communication groups, such as Whatsapp or Line.	gloves, mask, frequent hand-washing , Use of cologne, wet wipes, and hand disinfectant , not entering public areas , not having physical contact (handshaking, kissing, etc.) , frequent ventilation of the environment , changing clothes upon arrival home ,taking a shower upon arrival home	Henüz staj yapmıyorum	Henüz diş tedevisi yapmıyorum	Yes	Yes	Yes	Undecided	endodontics	Yes	Undecided
2	Male	No	No	I don’t know	No	Websites or social media accounts of professional organizations, such as the Ministry of Health, Dental Association, and WHO, Social media accounts, like Instagram, Facebook, and Twitter	frequent hand-washing , Use of cologne, wet wipes, and hand disinfectant , not entering public areas , not having physical contact (handshaking, kissing, etc.) , frequent ventilation of the environment	Stajımız yok	Hasta bakmıyoruz	Yes	Yes	No	Yes	periodontology	Undecided	No
1	Female	No	No	No	No	Websites or social media accounts of professional organizations, such as the Ministry of Health, Dental Association, and WHO	gloves, mask, frequent hand-washing , Use of cologne, wet wipes, and hand disinfectant , not entering public areas , not having physical contact (handshaking, kissing, etc.) , frequent ventilation of the environment , changing clothes upon arrival home ,taking a shower upon arrival home , Ekstra yaptığım bişey yok	mask, gloves, safety glasses, face protective shield, bonnet, frequent hand-washing	None	Yes	No	Yes	No	oral and maxillofacial surgery	Undecided	No
2	Female	No	No	No	No	Websites or social media accounts of professional organizations, such as the Ministry of Health, Dental Association, and WHO, From information meetings held in institutions, Television and radio programs	frequent hand-washing , Use of cologne, wet wipes, and hand disinfectant , not entering public areas , not having physical contact (handshaking, kissing, etc.) , changing clothes upon arrival home ,taking a shower upon arrival home	mask, gloves, safety glasses, bonnet, frequent hand-washing	None	Undecided	Yes	Undecided	Yes	oral and maxillofacial surgery	Yes	Undecided
1	Female	No	No	No	No	Websites or social media accounts of professional organizations, such as the Ministry of Health, Dental Association, and WHO, Published scientific articles, Television and radio programs	gloves, mask, frequent hand-washing , Use of cologne, wet wipes, and hand disinfectant , not entering public areas , not having physical contact (handshaking, kissing, etc.) , frequent ventilation of the environment , changing clothes upon arrival home ,taking a shower upon arrival home	None, Henüz 1. Sınıfım	None, Henüz 1. Sınıfım.	Undecided	Undecided	Yes	Undecided	oral diagnosis and radiology	Yes	No
1	Female	No	No	No	No	Websites or social media accounts of professional organizations, such as the Ministry of Health, Dental Association, and WHO, Published scientific articles, Television and radio programs	gloves, mask, frequent hand-washing , Use of cologne, wet wipes, and hand disinfectant , not entering public areas , not having physical contact (handshaking, kissing, etc.) , frequent ventilation of the environment , changing clothes upon arrival home ,taking a shower upon arrival home	None, Henüz 1. Sınıfım	None, Henüz 1. Sınıfım.	Undecided	Undecided	Yes	Undecided	oral diagnosis and radiology	Yes	No
2	Female	No	No	I don’t know	No	Websites or social media accounts of professional organizations, such as the Ministry of Health, Dental Association, and WHO, Physicians’ individual websites or social media accounts, Social media accounts, like Instagram, Facebook, and Twitter, Television and radio programs	frequent hand-washing , Use of cologne, wet wipes, and hand disinfectant , not entering public areas , not having physical contact (handshaking, kissing, etc.) , frequent ventilation of the environment , changing clothes upon arrival home	mask, gloves, safety glasses, face protective shield, bonnet, Tek kullanımlık box önlüğü, frequent hand-washing , frequent hand antiseptic	asked whether the patient had symptoms, such as fever, cough, or shortness of breath, measured the patient’s fever, avoided aerosols and processes that would create droplets, postponed appointments of potentially infected patients for at least 14 days	Yes	Yes	Yes	Undecided	oral and maxillofacial surgery	Yes	No
2	Female	No	No	No	No	Websites or social media accounts of professional organizations, such as the Ministry of Health, Dental Association, and WHO, Published scientific articles, Physicians’ individual websites or social media accounts, Social media accounts, like Instagram, Facebook, and Twitter	gloves, frequent hand-washing , Use of cologne, wet wipes, and hand disinfectant , not entering public areas , frequent ventilation of the environment , changing clothes upon arrival home ,taking a shower upon arrival home	mask, gloves, safety glasses, face protective shield, bonnet, frequent hand-washing , frequent hand antiseptic	asked whether the patient had symptoms, such as fever, cough, or shortness of breath, measured the patient’s fever, used a strong saliva absorber during the procedure, ,, avoided aerosols and processes that would create droplets, preferring to use hand tools instead of an aerator, cavitron, or micromotor, postponed appointments of potentially infected patients for at least 14 days	Yes	Yes	Yes	Yes	endodontics	Yes	No
2	Male	No	No	No	Yes	Websites or social media accounts of professional organizations, such as the Ministry of Health, Dental Association, and WHO, Published scientific articles, Physicians’ individual websites or social media accounts, Social media accounts, like Instagram, Facebook, and Twitter, Television and radio programs, Communication groups, such as Whatsapp or Line.	frequent hand-washing , Use of cologne, wet wipes, and hand disinfectant , not entering public areas , frequent ventilation of the environment , changing clothes upon arrival home ,taking a shower upon arrival home	mask, FFP3/N95 mask, gloves, safety glasses, face protective shield, bonnet, Tek kullanımlık box önlüğü, frequent hand-washing , frequent hand antiseptic	asked whether the patient had symptoms, such as fever, cough, or shortness of breath, measured the patient’s fever, applied a rubber dam, rinsed the mouth with a mouthwash containing chlorhexidin, ,, ,, used a strong saliva absorber during the procedure, ,, avoided aerosols and processes that would create droplets, preferring to use hand tools instead of an aerator, cavitron, or micromotor, postp…	Yes	No	Yes	Yes	endodontics	No	No
1	Male	No	No	No	No	From information meetings held in institutions, Published scientific articles, Physicians’ individual websites or social media accounts	gloves, mask, frequent hand-washing , Use of cologne, wet wipes, and hand disinfectant , not entering public areas , not having physical contact (handshaking, kissing, etc.) , frequent ventilation of the environment , changing clothes upon arrival home ,taking a shower upon arrival home , Ekstra yaptığım bişey yok	None	None	Yes	Yes	Yes	Yes	prosthesis	Yes	No
1	Female	No	No	No	No	Websites or social media accounts of professional organizations, such as the Ministry of Health, Dental Association, and WHO, Social media accounts, like Instagram, Facebook, and Twitter, Television and radio programs, Communication groups, such as Whatsapp or Line.	mask, frequent hand-washing , Use of cologne, wet wipes, and hand disinfectant , not entering public areas , not having physical contact (handshaking, kissing, etc.) , frequent ventilation of the environment , changing clothes upon arrival home	mask, gloves, safety glasses, bonnet, frequent hand-washing	asked whether the patient had symptoms, such as fever, cough, or shortness of breath	Yes	Yes	Yes	No	endodontics	Undecided	No
1	Male	Yes	No	No	No	Websites or social media accounts of professional organizations, such as the Ministry of Health, Dental Association, and WHO, Published scientific articles, Social media accounts, like Instagram, Facebook, and Twitter, Television and radio programs, Communication groups, such as Whatsapp or Line.	frequent hand-washing , Use of cologne, wet wipes, and hand disinfectant , not entering public areas , not having physical contact (handshaking, kissing, etc.) , frequent ventilation of the environment , changing clothes upon arrival home ,taking a shower upon arrival home	None	asked whether the patient had symptoms, such as fever, cough, or shortness of breath, measured the patient’s fever, avoided aerosols and processes that would create droplets, preferring to use hand tools instead of an aerator, cavitron, or micromotor, postponed appointments of potentially infected patients for at least 14 days	Yes	Yes	No	No	oral and maxillofacial surgery	Yes	No
2	Female	No	No	No	No	Websites or social media accounts of professional organizations, such as the Ministry of Health, Dental Association, and WHO, Physicians’ individual websites or social media accounts, Social media accounts, like Instagram, Facebook, and Twitter, Television and radio programs, Communication groups, such as Whatsapp or Line.	frequent hand-washing , Use of cologne, wet wipes, and hand disinfectant , not entering public areas , not having physical contact (handshaking, kissing, etc.) , frequent ventilation of the environment , changing clothes upon arrival home	mask, FFP3/N95 mask, gloves, safety glasses, frequent hand-washing , frequent hand antiseptic	asked whether the patient had symptoms, such as fever, cough, or shortness of breath, measured the patient’s fever	Yes	Yes	Yes	No	restorative dentistry	Yes	No
2	Female	No	No	No	Yes	Websites or social media accounts of professional organizations, such as the Ministry of Health, Dental Association, and WHO, From information meetings held in institutions, Physicians’ individual websites or social media accounts, Social media accounts, like Instagram, Facebook, and Twitter, Television and radio programs, Communication groups, such as Whatsapp or Line.	gloves, mask, frequent hand-washing , Use of cologne, wet wipes, and hand disinfectant , not entering public areas , not having physical contact (handshaking, kissing, etc.) , frequent ventilation of the environment , changing clothes upon arrival home	mask, gloves, safety glasses, face protective shield, bonnet, Tek kullanımlık box önlüğü, frequent hand-washing , frequent hand antiseptic	asked whether the patient had symptoms, such as fever, cough, or shortness of breath, measured the patient’s fever, applied a rubber dam, rinsed the mouth with a mouthwash containing chlorhexidin, avoided aerosols and processes that would create droplets, preferring to use hand tools instead of an aerator, cavitron, or micromotor, postponed appointments of potentially infected patients for at lea…	Undecided	Yes	Yes	Yes	endodontics	Yes	No
1	Female	No	No	No	No	Websites or social media accounts of professional organizations, such as the Ministry of Health, Dental Association, and WHO	gloves, mask, frequent hand-washing , Use of cologne, wet wipes, and hand disinfectant , not entering public areas , not having physical contact (handshaking, kissing, etc.) , frequent ventilation of the environment , changing clothes upon arrival home	mask, FFP3/N95 mask, gloves, safety glasses, face protective shield, bonnet, Tek kullanımlık box önlüğü, frequent hand-washing , frequent hand antiseptic, None	asked whether the patient had symptoms, such as fever, cough, or shortness of breath, measured the patient’s fever, applied a rubber dam, rinsed the mouth with a mouthwash containing chlorhexidin, ,, ,, used a strong saliva absorber during the procedure, ,, avoided aerosols and processes that would create droplets, preferring to use hand tools instead of an aerator, cavitron, or micromotor, postp…	Yes	Yes	Yes	Undecided	oral and maxillofacial surgery	Yes	Undecided
1	Female	No	No	No	No	Websites or social media accounts of professional organizations, such as the Ministry of Health, Dental Association, and WHO, Social media accounts, like Instagram, Facebook, and Twitter, Communication groups, such as Whatsapp or Line.	frequent hand-washing , not entering public areas , not having physical contact (handshaking, kissing, etc.)	face protective shield, bonnet, Tek kullanımlık box önlüğü	asked whether the patient had symptoms, such as fever, cough, or shortness of breath, measured the patient’s fever, applied a rubber dam	Yes	Yes	Yes	Yes	endodontics	Undecided	No
2	Male	No	No	Yes	No	Websites or social media accounts of professional organizations, such as the Ministry of Health, Dental Association, and WHO, Published scientific articles, Social media accounts, like Instagram, Facebook, and Twitter	gloves, mask, frequent hand-washing , Use of cologne, wet wipes, and hand disinfectant , not entering public areas , not having physical contact (handshaking, kissing, etc.) , frequent ventilation of the environment , changing clothes upon arrival home ,taking a shower upon arrival home	mask, gloves, safety glasses, bonnet	None	Undecided	Undecided	Yes	No	oral and maxillofacial surgery	Yes	No
1	Male	No	No	I don’t know	Yes	Websites or social media accounts of professional organizations, such as the Ministry of Health, Dental Association, and WHO, Television and radio programs	frequent hand-washing , Use of cologne, wet wipes, and hand disinfectant , not entering public areas , not having physical contact (handshaking, kissing, etc.) , frequent ventilation of the environment , changing clothes upon arrival home ,taking a shower upon arrival home , Ekstra yaptığım bişey yok	mask	asked whether the patient had symptoms, such as fever, cough, or shortness of breath	No	Undecided	Yes	No	oral and maxillofacial surgery	Yes	No
2	Female	No	No	No	No	Websites or social media accounts of professional organizations, such as the Ministry of Health, Dental Association, and WHO, Physicians’ individual websites or social media accounts, Social media accounts, like Instagram, Facebook, and Twitter, Television and radio programs, Communication groups, such as Whatsapp or Line.	mask, frequent hand-washing , Use of cologne, wet wipes, and hand disinfectant , not entering public areas , not having physical contact (handshaking, kissing, etc.) , frequent ventilation of the environment , changing clothes upon arrival home	FFP3/N95 mask, gloves, face protective shield, bonnet, Tek kullanımlık box önlüğü, frequent hand-washing , frequent hand antiseptic	asked whether the patient had symptoms, such as fever, cough, or shortness of breath, applied a rubber dam, ,, used a strong saliva absorber during the procedure, ,, avoided aerosols and processes that would create droplets, postponed appointments of potentially infected patients for at least 14 days	Yes	Yes	Yes	Yes	oral and maxillofacial surgery	No	Undecided
2	Male	No	I don’t know	I don’t know	No	Social media accounts, like Instagram, Facebook, and Twitter, Television and radio programs, Communication groups, such as Whatsapp or Line.	frequent hand-washing , Use of cologne, wet wipes, and hand disinfectant , not entering public areas	mask, gloves, frequent hand-washing , frequent hand antiseptic	asked whether the patient had symptoms, such as fever, cough, or shortness of breath, measured the patient’s fever, applied a rubber dam, avoided aerosols and processes that would create droplets	Yes	Yes	Yes	Undecided	restorative dentistry	Yes	Undecided
2	Female	No	No	No	No	Websites or social media accounts of professional organizations, such as the Ministry of Health, Dental Association, and WHO, Published scientific articles, Social media accounts, like Instagram, Facebook, and Twitter, Television and radio programs, Communication groups, such as Whatsapp or Line.	frequent hand-washing , Use of cologne, wet wipes, and hand disinfectant , not having physical contact (handshaking, kissing, etc.)	mask	asked whether the patient had symptoms, such as fever, cough, or shortness of breath	Yes	Yes	Yes	No	prosthesis	Yes	No
2	Male	No	No	No	No	Websites or social media accounts of professional organizations, such as the Ministry of Health, Dental Association, and WHO	frequent hand-washing , Use of cologne, wet wipes, and hand disinfectant , not entering public areas , not having physical contact (handshaking, kissing, etc.) , frequent ventilation of the environment , changing clothes upon arrival home	mask, gloves, safety glasses, bonnet, frequent hand-washing	asked whether the patient had symptoms, such as fever, cough, or shortness of breath, measured the patient’s fever, applied a rubber dam, avoided aerosols and processes that would create droplets, postponed appointments of potentially infected patients for at least 14 days	Yes	Yes	Yes	Yes	oral and maxillofacial surgery	Yes	No
2	Female	No	No	I don’t know	No	Websites or social media accounts of professional organizations, such as the Ministry of Health, Dental Association, and WHO, Published scientific articles, Social media accounts, like Instagram, Facebook, and Twitter, Television and radio programs	mask, frequent hand-washing , Use of cologne, wet wipes, and hand disinfectant , not entering public areas , not having physical contact (handshaking, kissing, etc.) , frequent ventilation of the environment	mask, gloves, safety glasses, face protective shield, bonnet, Tek kullanımlık box önlüğü, frequent hand-washing , frequent hand antiseptic	asked whether the patient had symptoms, such as fever, cough, or shortness of breath, measured the patient’s fever, applied a rubber dam, rinsed the mouth with a mouthwash containing chlorhexidin, avoided aerosols and processes that would create droplets	No	Yes	Yes	Yes	periodontology	Yes	No
2	Female	No	No	No	No	Websites or social media accounts of professional organizations, such as the Ministry of Health, Dental Association, and WHO, Television and radio programs	gloves, mask, frequent hand-washing , Use of cologne, wet wipes, and hand disinfectant , not entering public areas , not having physical contact (handshaking, kissing, etc.) , frequent ventilation of the environment , changing clothes upon arrival home ,taking a shower upon arrival home	mask, gloves, safety glasses, frequent hand antiseptic	asked whether the patient had symptoms, such as fever, cough, or shortness of breath, measured the patient’s fever	Yes	Yes	Yes	Undecided	oral diagnosis and radiology	Yes	No
2	Female	No	No	I don’t know	No	Websites or social media accounts of professional organizations, such as the Ministry of Health, Dental Association, and WHO, Published scientific articles, Social media accounts, like Instagram, Facebook, and Twitter, Television and radio programs	mask, frequent hand-washing , Use of cologne, wet wipes, and hand disinfectant , not entering public areas , not having physical contact (handshaking, kissing, etc.) , frequent ventilation of the environment	mask, gloves, safety glasses, face protective shield, bonnet, Tek kullanımlık box önlüğü, frequent hand-washing , frequent hand antiseptic	asked whether the patient had symptoms, such as fever, cough, or shortness of breath, measured the patient’s fever, applied a rubber dam, rinsed the mouth with a mouthwash containing chlorhexidin, avoided aerosols and processes that would create droplets	No	Yes	Yes	Yes	periodontology	Yes	No
2	Male	No	No	No	No	Published scientific articles, Television and radio programs	gloves, mask, frequent hand-washing , Use of cologne, wet wipes, and hand disinfectant , not entering public areas , not having physical contact (handshaking, kissing, etc.) , frequent ventilation of the environment , changing clothes upon arrival home ,taking a shower upon arrival home , Ekstra yaptığım bişey yok	None	None	Yes	Yes	Yes	Undecided	prosthesis	Undecided	Undecided
1	Female	No	No	Yes	Yes	Websites or social media accounts of professional organizations, such as the Ministry of Health, Dental Association, and WHO, Published scientific articles, Physicians’ individual websites or social media accounts, Television and radio programs	mask, frequent hand-washing , Use of cologne, wet wipes, and hand disinfectant , not entering public areas , not having physical contact (handshaking, kissing, etc.) , frequent ventilation of the environment , changing clothes upon arrival home ,taking a shower upon arrival home	mask, gloves, face protective shield, frequent hand-washing , frequent hand antiseptic	asked whether the patient had symptoms, such as fever, cough, or shortness of breath, measured the patient’s fever, used a strong saliva absorber during the procedure, avoided aerosols and processes that would create droplets, preferring to use hand tools instead of an aerator, cavitron, or micromotor, postponed appointments of potentially infected patients for at least 14 days	Yes	Yes	Yes	No	prosthesis	Yes	No
1	Male	No	No	No	No	Published scientific articles, Physicians’ individual websites or social media accounts, Social media accounts, like Instagram, Facebook, and Twitter, Television and radio programs	frequent hand-washing , Use of cologne, wet wipes, and hand disinfectant , not entering public areas , not having physical contact (handshaking, kissing, etc.) , frequent ventilation of the environment	safety glasses, face protective shield	rinsed the mouth with a mouthwash containing chlorhexidin, avoided aerosols and processes that would create droplets	Yes	No	No	Yes	periodontology	No	Yes
1	Male	Yes	I don’t know	I don’t know	Yes	Websites or social media accounts of professional organizations, such as the Ministry of Health, Dental Association, and WHO	mask	mask	measured the patient’s fever	Yes	Yes	Yes	No	oral and maxillofacial surgery	Undecided	No
2	Female	No	I don’t know	I don’t know	No	Websites or social media accounts of professional organizations, such as the Ministry of Health, Dental Association, and WHO, From information meetings held in institutions	mask, frequent hand-washing , Use of cologne, wet wipes, and hand disinfectant , not entering public areas	mask, FFP3/N95 mask, gloves, safety glasses, face protective shield, bonnet, frequent hand-washing , frequent hand antiseptic	asked whether the patient had symptoms, such as fever, cough, or shortness of breath, rinsed the mouth with a mouthwash containing chlorhexidin	Yes	Undecided	Undecided	Undecided	periodontology	Undecided	Undecided
2	Female	No	I don’t know	I don’t know	No	Websites or social media accounts of professional organizations, such as the Ministry of Health, Dental Association, and WHO, Published scientific articles, Physicians’ individual websites or social media accounts, Social media accounts, like Instagram, Facebook, and Twitter, Television and radio programs, Communication groups, such as Whatsapp or Line.	gloves, mask, frequent hand-washing , Use of cologne, wet wipes, and hand disinfectant , not entering public areas , not having physical contact (handshaking, kissing, etc.) , frequent ventilation of the environment , changing clothes upon arrival home	mask, gloves, safety glasses, face protective shield, frequent hand-washing , frequent hand antiseptic	asked whether the patient had symptoms, such as fever, cough, or shortness of breath, None	Undecided	Yes	Yes	Undecided	endodontics	Yes	No
1	Male	No	No	No	No	Websites or social media accounts of professional organizations, such as the Ministry of Health, Dental Association, and WHO	mask, frequent hand-washing , not entering public areas , not having physical contact (handshaking, kissing, etc.) , frequent ventilation of the environment , changing clothes upon arrival home	None	None	Yes	No	Yes	No	restorative dentistry	Yes	No
1	Male	No	No	I don’t know	No	Websites or social media accounts of professional organizations, such as the Ministry of Health, Dental Association, and WHO, Television and radio programs	frequent hand-washing , Use of cologne, wet wipes, and hand disinfectant , Ekstra yaptığım bişey yok	None	None	No	Undecided	Yes	No	endodontics	Yes	No
2	Female	No	No	No	Yes	Websites or social media accounts of professional organizations, such as the Ministry of Health, Dental Association, and WHO, Published scientific articles, Physicians’ individual websites or social media accounts, Social media accounts, like Instagram, Facebook, and Twitter, Television and radio programs	gloves, mask, frequent hand-washing , Use of cologne, wet wipes, and hand disinfectant , not entering public areas , not having physical contact (handshaking, kissing, etc.) , frequent ventilation of the environment , changing clothes upon arrival home ,taking a shower upon arrival home	Henüz staj görmüyorum	Henüz hasta bakmıyorum	Yes	Yes	Yes	No	endodontics	Yes	No
2	Male	No	No	No	No	Websites or social media accounts of professional organizations, such as the Ministry of Health, Dental Association, and WHO, Published scientific articles, Physicians’ individual websites or social media accounts	Use of cologne, wet wipes, and hand disinfectant , not entering public areas , not having physical contact (handshaking, kissing, etc.) , frequent ventilation of the environment	FFP3/N95 mask, frequent hand antiseptic	asked whether the patient had symptoms, such as fever, cough, or shortness of breath	Yes	Yes	Yes	Yes	periodontology	Yes	Undecided
2	Female	No	I don’t know	No	No	Websites or social media accounts of professional organizations, such as the Ministry of Health, Dental Association, and WHO, From information meetings held in institutions, Published scientific articles, Physicians’ individual websites or social media accounts, Social media accounts, like Instagram, Facebook, and Twitter, Television and radio programs	frequent hand-washing , Use of cologne, wet wipes, and hand disinfectant , not entering public areas , not having physical contact (handshaking, kissing, etc.) , frequent ventilation of the environment ,taking a shower upon arrival home	mask, FFP3/N95 mask, gloves, safety glasses, face protective shield, bonnet, Tek kullanımlık box önlüğü, frequent hand-washing , frequent hand antiseptic	asked whether the patient had symptoms, such as fever, cough, or shortness of breath, applied a rubber dam	Yes	Yes	Yes	Yes	restorative dentistry	Yes	No
1	Male	No	No	No	No	From information meetings held in institutions	frequent hand-washing	frequent hand-washing	asked whether the patient had symptoms, such as fever, cough, or shortness of breath	Undecided	Yes	Yes	Undecided	oral and maxillofacial surgery	Yes	No
2	Female	No	No	Yes	No	Websites or social media accounts of professional organizations, such as the Ministry of Health, Dental Association, and WHO, Physicians’ individual websites or social media accounts, Social media accounts, like Instagram, Facebook, and Twitter	gloves, mask, frequent hand-washing , Use of cologne, wet wipes, and hand disinfectant , not entering public areas , not having physical contact (handshaking, kissing, etc.) , frequent ventilation of the environment , changing clothes upon arrival home	mask, gloves, safety glasses, face protective shield, bonnet, Tek kullanımlık box önlüğü, frequent hand-washing	applied a rubber dam	Yes	Yes	Yes	Yes	endodontics	Yes	No
1	Female	No	No	No	Yes	Websites or social media accounts of professional organizations, such as the Ministry of Health, Dental Association, and WHO, Physicians’ individual websites or social media accounts, Social media accounts, like Instagram, Facebook, and Twitter	gloves, mask, frequent hand-washing , Use of cologne, wet wipes, and hand disinfectant , not entering public areas , not having physical contact (handshaking, kissing, etc.) , frequent ventilation of the environment , changing clothes upon arrival home ,taking a shower upon arrival home	FFP3/N95 mask, gloves, safety glasses, frequent hand-washing , frequent hand antiseptic	measured the patient’s fever, rinsed the mouth with a mouthwash containing chlorhexidin, used a strong saliva absorber during the procedure, ,, avoided aerosols and processes that would create droplets, postponed appointments of potentially infected patients for at least 14 days	No	Yes	Yes	No	oral and maxillofacial surgery	Yes	No
2	Male	No	No	No	No	Television and radio programs	not having physical contact (handshaking, kissing, etc.)	mask	asked whether the patient had symptoms, such as fever, cough, or shortness of breath, rinsed the mouth with a mouthwash containing chlorhexidin, avoided aerosols and processes that would create droplets, postponed appointments of potentially infected patients for at least 14 days	Yes	Yes	Yes	Yes	endodontics	Yes	Undecided
1	Male	Yes	No	No	No	Websites or social media accounts of professional organizations, such as the Ministry of Health, Dental Association, and WHO, Published scientific articles, Social media accounts, like Instagram, Facebook, and Twitter, Television and radio programs	frequent hand-washing , not entering public areas , frequent ventilation of the environment	gloves, safety glasses, face protective shield, frequent hand-washing	applied a rubber dam, rinsed the mouth with a mouthwash containing chlorhexidin, ,	Yes	Yes	Yes	No	oral diagnosis and radiology	Undecided	No
2	Female	No	No	No	No	Social media accounts, like Instagram, Facebook, and Twitter, Television and radio programs, Communication groups, such as Whatsapp or Line.	gloves, mask, frequent hand-washing , Use of cologne, wet wipes, and hand disinfectant , not entering public areas , not having physical contact (handshaking, kissing, etc.) , frequent ventilation of the environment , changing clothes upon arrival home	None	None	Yes	Yes	Yes	Yes	periodontology	Yes	Undecided
2	Female	No	No	No	No	Websites or social media accounts of professional organizations, such as the Ministry of Health, Dental Association, and WHO, Published scientific articles, Physicians’ individual websites or social media accounts, Social media accounts, like Instagram, Facebook, and Twitter	gloves, mask, frequent hand-washing , Use of cologne, wet wipes, and hand disinfectant , not entering public areas , not having physical contact (handshaking, kissing, etc.) , frequent ventilation of the environment , changing clothes upon arrival home ,taking a shower upon arrival home	mask, FFP3/N95 mask, gloves, safety glasses, face protective shield, bonnet, frequent hand-washing , frequent hand antiseptic	asked whether the patient had symptoms, such as fever, cough, or shortness of breath, measured the patient’s fever, rinsed the mouth with a mouthwash containing chlorhexidin, used a strong saliva absorber during the procedure, ,, preferring to use hand tools instead of an aerator, cavitron, or micromotor, postponed appointments of potentially infected patients for at least 14 days	Yes	Yes	Yes	Yes	periodontology	Yes	No
1	Female	Yes	No	I don’t know	No	Websites or social media accounts of professional organizations, such as the Ministry of Health, Dental Association, and WHO	gloves, mask, frequent hand-washing , Use of cologne, wet wipes, and hand disinfectant , not entering public areas , not having physical contact (handshaking, kissing, etc.) , changing clothes upon arrival home	mask, gloves, safety glasses, bonnet, frequent hand-washing , frequent hand antiseptic	asked whether the patient had symptoms, such as fever, cough, or shortness of breath, measured the patient’s fever, used a strong saliva absorber during the procedure, avoided aerosols and processes that would create droplets, postponed appointments of potentially infected patients for at least 14 days	Yes	Yes	Yes	Undecided	endodontics	Yes	No
1	Male	No	No	No	No	Social media accounts, like Instagram, Facebook, and Twitter, Television and radio programs	mask, frequent hand-washing , Use of cologne, wet wipes, and hand disinfectant , not entering public areas , not having physical contact (handshaking, kissing, etc.) , frequent ventilation of the environment , changing clothes upon arrival home ,taking a shower upon arrival home	None	None	Yes	Yes	Yes	Yes	oral and maxillofacial surgery	Yes	Undecided
1	Female	No	No	No	No	Websites or social media accounts of professional organizations, such as the Ministry of Health, Dental Association, and WHO	frequent hand-washing , Use of cologne, wet wipes, and hand disinfectant , not entering public areas , not having physical contact (handshaking, kissing, etc.) , frequent ventilation of the environment , changing clothes upon arrival home , Okul tatil olduğundan beri hiç evden çıkmadım :(	Stajim yok	Tedevi yapmiyorum	No	Yes	Yes	Yes	pedodontics	Undecided	Undecided
1	Male	No	No	I don’t know	No	Websites or social media accounts of professional organizations, such as the Ministry of Health, Dental Association, and WHO, Physicians’ individual websites or social media accounts, Social media accounts, like Instagram, Facebook, and Twitter, Television and radio programs	frequent hand-washing , Use of cologne, wet wipes, and hand disinfectant , not entering public areas , not having physical contact (handshaking, kissing, etc.) , frequent ventilation of the environment , changing clothes upon arrival home ,taking a shower upon arrival home	None	None	Undecided	Yes	Yes	No	endodontics	Yes	No
1	Female	No	No	No	No	Websites or social media accounts of professional organizations, such as the Ministry of Health, Dental Association, and WHO, Physicians’ individual websites or social media accounts, Social media accounts, like Instagram, Facebook, and Twitter, Television and radio programs, Communication groups, such as Whatsapp or Line.	frequent hand-washing , Use of cologne, wet wipes, and hand disinfectant , not entering public areas , not having physical contact (handshaking, kissing, etc.)	mask, gloves, bonnet, frequent hand-washing , frequent hand antiseptic	asked whether the patient had symptoms, such as fever, cough, or shortness of breath, measured the patient’s fever	Undecided	Yes	Yes	No	oral and maxillofacial surgery	Yes	Undecided
1	Female	Yes	No	No	No	Websites or social media accounts of professional organizations, such as the Ministry of Health, Dental Association, and WHO	gloves, mask, frequent hand-washing , Use of cologne, wet wipes, and hand disinfectant , not entering public areas , not having physical contact (handshaking, kissing, etc.) , frequent ventilation of the environment , changing clothes upon arrival home ,taking a shower upon arrival home	None	asked whether the patient had symptoms, such as fever, cough, or shortness of breath, measured the patient’s fever	Undecided	Yes	Yes	Undecided	restorative dentistry	Undecided	No
2	Male	No	I don’t know	No	No	Websites or social media accounts of professional organizations, such as the Ministry of Health, Dental Association, and WHO, Published scientific articles, Physicians’ individual websites or social media accounts, Social media accounts, like Instagram, Facebook, and Twitter	gloves, mask, frequent hand-washing , Use of cologne, wet wipes, and hand disinfectant , not entering public areas , not having physical contact (handshaking, kissing, etc.)	mask, FFP3/N95 mask, gloves, safety glasses, frequent hand-washing	asked whether the patient had symptoms, such as fever, cough, or shortness of breath, measured the patient’s fever, applied a rubber dam, ,, postponed appointments of potentially infected patients for at least 14 days	No	No	Yes	No	oral diagnosis and radiology	Yes	No
1	Male	No	No	No	No	Published scientific articles, Physicians’ individual websites or social media accounts, Social media accounts, like Instagram, Facebook, and Twitter, Television and radio programs	frequent hand-washing , Use of cologne, wet wipes, and hand disinfectant , not entering public areas , not having physical contact (handshaking, kissing, etc.) , frequent ventilation of the environment	None	None	Yes	Yes	Yes	No	endodontics	Undecided	No
1	Male	No	No	No	No	Websites or social media accounts of professional organizations, such as the Ministry of Health, Dental Association, and WHO, Social media accounts, like Instagram, Facebook, and Twitter, Television and radio programs	frequent hand-washing , Use of cologne, wet wipes, and hand disinfectant , not entering public areas , not having physical contact (handshaking, kissing, etc.) , frequent ventilation of the environment , changing clothes upon arrival home	None	None	Yes	Yes	Yes	Yes	oral and maxillofacial surgery	Undecided	No
1	Male	No	No	I don’t know	No	Websites or social media accounts of professional organizations, such as the Ministry of Health, Dental Association, and WHO, Published scientific articles, Physicians’ individual websites or social media accounts, Social media accounts, like Instagram, Facebook, and Twitter, Television and radio programs	mask, frequent hand-washing , Use of cologne, wet wipes, and hand disinfectant , not entering public areas , not having physical contact (handshaking, kissing, etc.) , frequent ventilation of the environment	mask, frequent hand-washing	None	Undecided	Undecided	Yes	Undecided	endodontics	Yes	No
1	Male	Yes	No	I don’t know	No	Websites or social media accounts of professional organizations, such as the Ministry of Health, Dental Association, and WHO, From information meetings held in institutions, Social media accounts, like Instagram, Facebook, and Twitter, Television and radio programs	frequent hand-washing , Use of cologne, wet wipes, and hand disinfectant , not entering public areas , not having physical contact (handshaking, kissing, etc.) , frequent ventilation of the environment	None	None	Undecided	No	Yes	No	endodontics	Yes	No
2	Male	No	I don’t know	I don’t know	No	Physicians’ individual websites or social media accounts, Social media accounts, like Instagram, Facebook, and Twitter, Television and radio programs, Communication groups, such as Whatsapp or Line.	frequent hand-washing , Use of cologne, wet wipes, and hand disinfectant , not entering public areas , not having physical contact (handshaking, kissing, etc.) , frequent ventilation of the environment	mask, FFP3/N95 mask, gloves, safety glasses, face protective shield, bonnet, Tek kullanımlık box önlüğü, frequent hand-washing , frequent hand antiseptic	asked whether the patient had symptoms, such as fever, cough, or shortness of breath, measured the patient’s fever, applied a rubber dam, rinsed the mouth with a mouthwash containing chlorhexidin, ,, ,, used a strong saliva absorber during the procedure, ,, avoided aerosols and processes that would create droplets, preferring to use hand tools instead of an aerator, cavitron, or micromotor, postp…	Yes	Undecided	Yes	No	endodontics	Yes	Yes
1	Female	Yes	I don’t know	I don’t know	No	Websites or social media accounts of professional organizations, such as the Ministry of Health, Dental Association, and WHO, Physicians’ individual websites or social media accounts, Social media accounts, like Instagram, Facebook, and Twitter, Television and radio programs, Communication groups, such as Whatsapp or Line.	gloves, mask, frequent hand-washing , Use of cologne, wet wipes, and hand disinfectant , not entering public areas , not having physical contact (handshaking, kissing, etc.) , frequent ventilation of the environment , changing clothes upon arrival home ,taking a shower upon arrival home	mask, gloves, safety glasses, bonnet, frequent hand-washing , frequent hand antiseptic	asked whether the patient had symptoms, such as fever, cough, or shortness of breath, measured the patient’s fever, used a strong saliva absorber during the procedure, avoided aerosols and processes that would create droplets, preferring to use hand tools instead of an aerator, cavitron, or micromotor, postponed appointments of potentially infected patients for at least 14 days	Yes	Undecided	Yes	Yes	oral and maxillofacial surgery	Yes	Undecided
3	Female	Yes	No	I don’t know	No	Websites or social media accounts of professional organizations, such as the Ministry of Health, Dental Association, and WHO	frequent hand-washing , Use of cologne, wet wipes, and hand disinfectant , not entering public areas , not having physical contact (handshaking, kissing, etc.) , frequent ventilation of the environment , changing clothes upon arrival home	mask, gloves, face protective shield, bonnet, frequent hand-washing , frequent hand antiseptic	asked whether the patient had symptoms, such as fever, cough, or shortness of breath, applied a rubber dam	Yes	Yes	Yes	Yes	prosthesis	Yes	Yes
1	Male	No	I don’t know	No	No	Social media accounts, like Instagram, Facebook, and Twitter, Television and radio programs	frequent hand-washing , Use of cologne, wet wipes, and hand disinfectant , not entering public areas , not having physical contact (handshaking, kissing, etc.) , frequent ventilation of the environment , changing clothes upon arrival home	mask, FFP3/N95 mask, safety glasses, face protective shield, bonnet, frequent hand-washing , frequent hand antiseptic	measured the patient’s fever, ,, used a strong saliva absorber during the procedure, avoided aerosols and processes that would create droplets	Yes	Yes	Yes	No	oral and maxillofacial surgery	Undecided	No
1	Female	No	Yes	No	No	Websites or social media accounts of professional organizations, such as the Ministry of Health, Dental Association, and WHO, Physicians’ individual websites or social media accounts, Social media accounts, like Instagram, Facebook, and Twitter	frequent hand-washing , Use of cologne, wet wipes, and hand disinfectant , not entering public areas , not having physical contact (handshaking, kissing, etc.) , changing clothes upon arrival home	mask, gloves, safety glasses, face protective shield, Tek kullanımlık box önlüğü, frequent hand-washing , frequent hand antiseptic	asked whether the patient had symptoms, such as fever, cough, or shortness of breath	Yes	Yes	Yes	Yes	endodontics	Yes	No
1	Male	No	I don’t know	I don’t know	No	Websites or social media accounts of professional organizations, such as the Ministry of Health, Dental Association, and WHO, From information meetings held in institutions, Published scientific articles, Social media accounts, like Instagram, Facebook, and Twitter, Television and radio programs, Communication groups, such as Whatsapp or Line.	mask, frequent hand-washing , Use of cologne, wet wipes, and hand disinfectant , not entering public areas , not having physical contact (handshaking, kissing, etc.) , frequent ventilation of the environment , changing clothes upon arrival home	mask, gloves, safety glasses, bonnet, frequent hand-washing , frequent hand antiseptic	asked whether the patient had symptoms, such as fever, cough, or shortness of breath, measured the patient’s fever, rinsed the mouth with a mouthwash containing chlorhexidin, ,	Yes	Yes	Yes	Yes	oral and maxillofacial surgery	Yes	Yes
2	Male	No	No	No	No	Websites or social media accounts of professional organizations, such as the Ministry of Health, Dental Association, and WHO, From information meetings held in institutions, Published scientific articles, Physicians’ individual websites or social media accounts	frequent hand-washing , Use of cologne, wet wipes, and hand disinfectant , not entering public areas , not having physical contact (handshaking, kissing, etc.) , frequent ventilation of the environment , changing clothes upon arrival home	mask, gloves, safety glasses, face protective shield, bonnet, frequent hand-washing , frequent hand antiseptic	asked whether the patient had symptoms, such as fever, cough, or shortness of breath, measured the patient’s fever, rinsed the mouth with a mouthwash containing chlorhexidin, ,, avoided aerosols and processes that would create droplets, preferring to use hand tools instead of an aerator, cavitron, or micromotor, postponed appointments of potentially infected patients for at least 14 days	No	Yes	Yes	No	prosthesis	Yes	No
1	Male	No	No	No	Yes	Websites or social media accounts of professional organizations, such as the Ministry of Health, Dental Association, and WHO, From information meetings held in institutions, Published scientific articles, Physicians’ individual websites or social media accounts, Social media accounts, like Instagram, Facebook, and Twitter, Television and radio programs, Communication groups, such as Whatsapp or L…	mask, frequent hand-washing , Use of cologne, wet wipes, and hand disinfectant , not entering public areas , not having physical contact (handshaking, kissing, etc.) , frequent ventilation of the environment , changing clothes upon arrival home ,taking a shower upon arrival home	FFP3/N95 mask, gloves, safety glasses, bonnet, Tek kullanımlık box önlüğü, frequent hand-washing , frequent hand antiseptic	asked whether the patient had symptoms, such as fever, cough, or shortness of breath, measured the patient’s fever, applied a rubber dam, rinsed the mouth with a mouthwash containing chlorhexidin, ,, ,, used a strong saliva absorber during the procedure, ,, avoided aerosols and processes that would create droplets, preferring to use hand tools instead of an aerator, cavitron, or micromotor, postp…	No	Yes	Yes	No	prosthesis	Yes	No
2	Female	No	I don’t know	No	No	Physicians’ individual websites or social media accounts, Social media accounts, like Instagram, Facebook, and Twitter, Television and radio programs	frequent hand-washing , Use of cologne, wet wipes, and hand disinfectant , not entering public areas , not having physical contact (handshaking, kissing, etc.) , frequent ventilation of the environment , changing clothes upon arrival home ,taking a shower upon arrival home	None	None	Yes	Yes	Yes	Yes	endodontics	Yes	No
2	Female	No	No	No	No	Websites or social media accounts of professional organizations, such as the Ministry of Health, Dental Association, and WHO, Physicians’ individual websites or social media accounts, Social media accounts, like Instagram, Facebook, and Twitter, Television and radio programs	gloves, mask, frequent hand-washing , Use of cologne, wet wipes, and hand disinfectant , not entering public areas , not having physical contact (handshaking, kissing, etc.) , frequent ventilation of the environment , changing clothes upon arrival home	mask, gloves, face protective shield, bonnet, frequent hand-washing , frequent hand antiseptic	asked whether the patient had symptoms, such as fever, cough, or shortness of breath, avoided aerosols and processes that would create droplets	Yes	Yes	Yes	Yes	endodontics	Yes	No
1	Female	No	I don’t know	I don’t know	No	Websites or social media accounts of professional organizations, such as the Ministry of Health, Dental Association, and WHO, Published scientific articles, Social media accounts, like Instagram, Facebook, and Twitter, Television and radio programs	mask, frequent hand-washing , Use of cologne, wet wipes, and hand disinfectant , not entering public areas , not having physical contact (handshaking, kissing, etc.) , frequent ventilation of the environment , changing clothes upon arrival home ,taking a shower upon arrival home	mask, gloves, safety glasses, bonnet, frequent hand-washing , frequent hand antiseptic	asked whether the patient had symptoms, such as fever, cough, or shortness of breath, avoided aerosols and processes that would create droplets, postponed appointments of potentially infected patients for at least 14 days	Yes	Undecided	Yes	No	prosthesis	Yes	No
1	Female	No	No	No	No	Websites or social media accounts of professional organizations, such as the Ministry of Health, Dental Association, and WHO, From information meetings held in institutions, Published scientific articles, Physicians’ individual websites or social media accounts, Social media accounts, like Instagram, Facebook, and Twitter, Television and radio programs	gloves, mask, frequent hand-washing , Use of cologne, wet wipes, and hand disinfectant , not entering public areas , not having physical contact (handshaking, kissing, etc.) , frequent ventilation of the environment , changing clothes upon arrival home	.	None	Undecided	Yes	Yes	Undecided	periodontology	Yes	Undecided
1	Male	No	No	No	No	Websites or social media accounts of professional organizations, such as the Ministry of Health, Dental Association, and WHO, Social media accounts, like Instagram, Facebook, and Twitter, Television and radio programs	gloves, mask, frequent hand-washing , Use of cologne, wet wipes, and hand disinfectant , not entering public areas , not having physical contact (handshaking, kissing, etc.) , frequent ventilation of the environment , changing clothes upon arrival home ,taking a shower upon arrival home	mask, FFP3/N95 mask, gloves, safety glasses, frequent hand-washing	None	Yes	Yes	Yes	Yes	oral and maxillofacial surgery	Yes	No
2	Female	No	No	No	No	Websites or social media accounts of professional organizations, such as the Ministry of Health, Dental Association, and WHO, Social media accounts, like Instagram, Facebook, and Twitter, Television and radio programs, Communication groups, such as Whatsapp or Line.	frequent hand-washing , Use of cologne, wet wipes, and hand disinfectant , not entering public areas , not having physical contact (handshaking, kissing, etc.) , frequent ventilation of the environment , changing clothes upon arrival home	Staj görmüyoruz	Staj görmüyoruz	Yes	Yes	Yes	Yes	periodontology	Yes	Undecided
2	Female	No	No	I don’t know	No	Websites or social media accounts of professional organizations, such as the Ministry of Health, Dental Association, and WHO, Physicians’ individual websites or social media accounts, Social media accounts, like Instagram, Facebook, and Twitter, Television and radio programs	mask, frequent hand-washing , Use of cologne, wet wipes, and hand disinfectant , not entering public areas , not having physical contact (handshaking, kissing, etc.) , frequent ventilation of the environment , changing clothes upon arrival home	mask, gloves, face protective shield, bonnet, Tek kullanımlık box önlüğü, frequent hand-washing , frequent hand antiseptic	asked whether the patient had symptoms, such as fever, cough, or shortness of breath, measured the patient’s fever, applied a rubber dam, used a strong saliva absorber during the procedure, ,, avoided aerosols and processes that would create droplets, postponed appointments of potentially infected patients for at least 14 days	Yes	Yes	Yes	Undecided	oral and maxillofacial surgery	Yes	No
2	Male	No	I don’t know	No	No	Websites or social media accounts of professional organizations, such as the Ministry of Health, Dental Association, and WHO, Physicians’ individual websites or social media accounts, Social media accounts, like Instagram, Facebook, and Twitter, Television and radio programs	frequent hand-washing , Use of cologne, wet wipes, and hand disinfectant , not entering public areas , not having physical contact (handshaking, kissing, etc.) , frequent ventilation of the environment , changing clothes upon arrival home	None	None	Yes	Yes	Yes	Undecided	oral and maxillofacial surgery	Yes	No
1	Female	No	No	I don’t know	No	Published scientific articles	Use of cologne, wet wipes, and hand disinfectant	FFP3/N95 mask	measured the patient’s fever	No	Undecided	Undecided	Yes	oral and maxillofacial surgery	No	Yes
2	Female	No	No	I don’t know	No	Websites or social media accounts of professional organizations, such as the Ministry of Health, Dental Association, and WHO, Social media accounts, like Instagram, Facebook, and Twitter, Communication groups, such as Whatsapp or Line.	gloves, mask, frequent hand-washing , Use of cologne, wet wipes, and hand disinfectant , not entering public areas , not having physical contact (handshaking, kissing, etc.) , frequent ventilation of the environment , changing clothes upon arrival home	mask, gloves, safety glasses, bonnet, frequent hand-washing , frequent hand antiseptic	asked whether the patient had symptoms, such as fever, cough, or shortness of breath, measured the patient’s fever, applied a rubber dam, postponed appointments of potentially infected patients for at least 14 days	Yes	Yes	Yes	No	periodontology	Yes	No
1	Female	No	I don’t know	I don’t know	No	Websites or social media accounts of professional organizations, such as the Ministry of Health, Dental Association, and WHO, Social media accounts, like Instagram, Facebook, and Twitter, Television and radio programs, Communication groups, such as Whatsapp or Line.	Use of cologne, wet wipes, and hand disinfectant , frequent ventilation of the environment	bonnet	measured the patient’s fever	Yes	Yes	No	Yes	oral and maxillofacial surgery	Undecided	No
1	Female	Yes	I don’t know	No	Yes	Websites or social media accounts of professional organizations, such as the Ministry of Health, Dental Association, and WHO, Physicians’ individual websites or social media accounts, Television and radio programs	frequent hand-washing , Use of cologne, wet wipes, and hand disinfectant , not entering public areas , not having physical contact (handshaking, kissing, etc.) , frequent ventilation of the environment , changing clothes upon arrival home ,taking a shower upon arrival home	FFP3/N95 mask, gloves, safety glasses, frequent hand-washing , frequent hand antiseptic	asked whether the patient had symptoms, such as fever, cough, or shortness of breath, rinsed the mouth with a mouthwash containing chlorhexidin, avoided aerosols and processes that would create droplets	Yes	Yes	Yes	Yes	restorative dentistry	No	Undecided
2	Male	No	No	No	No	Websites or social media accounts of professional organizations, such as the Ministry of Health, Dental Association, and WHO, Television and radio programs	gloves, mask, frequent hand-washing , Use of cologne, wet wipes, and hand disinfectant , not entering public areas , not having physical contact (handshaking, kissing, etc.) , frequent ventilation of the environment , changing clothes upon arrival home ,taking a shower upon arrival home	None	None	Yes	No	Yes	No	endodontics	Yes	No
2	Female	No	No	No	No	Websites or social media accounts of professional organizations, such as the Ministry of Health, Dental Association, and WHO, Television and radio programs, Communication groups, such as Whatsapp or Line.	gloves, mask, frequent hand-washing , Use of cologne, wet wipes, and hand disinfectant , not entering public areas , not having physical contact (handshaking, kissing, etc.) , frequent ventilation of the environment , changing clothes upon arrival home	mask, gloves, safety glasses, bonnet	used a strong saliva absorber during the procedure, postponed appointments of potentially infected patients for at least 14 days	Yes	Yes	Yes	No	oral and maxillofacial surgery	Yes	No
1	Female	Yes	No	No	No	Websites or social media accounts of professional organizations, such as the Ministry of Health, Dental Association, and WHO, Social media accounts, like Instagram, Facebook, and Twitter, Television and radio programs	frequent hand-washing , Use of cologne, wet wipes, and hand disinfectant , not entering public areas , not having physical contact (handshaking, kissing, etc.) , frequent ventilation of the environment , changing clothes upon arrival home	mask, gloves, safety glasses, face protective shield, bonnet, frequent hand-washing , frequent hand antiseptic	asked whether the patient had symptoms, such as fever, cough, or shortness of breath, used a strong saliva absorber during the procedure, avoided aerosols and processes that would create droplets, postponed appointments of potentially infected patients for at least 14 days	No	Undecided	Yes	No	oral and maxillofacial surgery	Yes	Yes
2	Male	Yes	No	Yes	No	Websites or social media accounts of professional organizations, such as the Ministry of Health, Dental Association, and WHO, Published scientific articles, Physicians’ individual websites or social media accounts	frequent hand-washing , Use of cologne, wet wipes, and hand disinfectant , not entering public areas , not having physical contact (handshaking, kissing, etc.) , frequent ventilation of the environment , changing clothes upon arrival home ,taking a shower upon arrival home	mask, gloves, face protective shield, bonnet, Tek kullanımlık box önlüğü, frequent hand-washing , frequent hand antiseptic	asked whether the patient had symptoms, such as fever, cough, or shortness of breath, measured the patient’s fever, applied a rubber dam	Yes	Yes	Yes	Yes	prosthesis	Yes	No
1	Male	Yes	Yes	No	No	Websites or social media accounts of professional organizations, such as the Ministry of Health, Dental Association, and WHO, Television and radio programs	frequent hand-washing , Use of cologne, wet wipes, and hand disinfectant , not entering public areas , not having physical contact (handshaking, kissing, etc.) , frequent ventilation of the environment	Staj yapmıyorum	Hastam yok	Yes	Undecided	Undecided	Undecided	oral and maxillofacial surgery	Undecided	No
2	Male	Yes	No	Yes	No	Websites or social media accounts of professional organizations, such as the Ministry of Health, Dental Association, and WHO, From information meetings held in institutions, Published scientific articles, Social media accounts, like Instagram, Facebook, and Twitter, Television and radio programs	frequent hand-washing , Use of cologne, wet wipes, and hand disinfectant , not entering public areas , not having physical contact (handshaking, kissing, etc.) , frequent ventilation of the environment , changing clothes upon arrival home ,taking a shower upon arrival home	mask, safety glasses, face protective shield, frequent hand-washing , frequent hand antiseptic	asked whether the patient had symptoms, such as fever, cough, or shortness of breath, applied a rubber dam, rinsed the mouth with a mouthwash containing chlorhexidin, avoided aerosols and processes that would create droplets, postponed appointments of potentially infected patients for at least 14 days	Undecided	Yes	Yes	Yes	oral and maxillofacial surgery	Yes	No
1	Male	No	No	Yes	No	Websites or social media accounts of professional organizations, such as the Ministry of Health, Dental Association, and WHO	frequent hand-washing , Use of cologne, wet wipes, and hand disinfectant , not entering public areas , not having physical contact (handshaking, kissing, etc.)	Tek kullanımlık box önlüğü	asked whether the patient had symptoms, such as fever, cough, or shortness of breath	Yes	No	Yes	No	prosthesis	Yes	No
1	Female	Yes	I don’t know	No	No	Websites or social media accounts of professional organizations, such as the Ministry of Health, Dental Association, and WHO, Television and radio programs, Communication groups, such as Whatsapp or Line.	frequent hand-washing , Use of cologne, wet wipes, and hand disinfectant , not entering public areas , frequent ventilation of the environment	Staj yapmıyorum	Hasta bakmıyorum	No	No	No	No	oral and maxillofacial surgery	Undecided	No
2	Male	No	No	I don’t know	Yes	Websites or social media accounts of professional organizations, such as the Ministry of Health, Dental Association, and WHO, Physicians’ individual websites or social media accounts	frequent hand-washing , Use of cologne, wet wipes, and hand disinfectant , not entering public areas , not having physical contact (handshaking, kissing, etc.) , frequent ventilation of the environment , changing clothes upon arrival home	FFP3/N95 mask, gloves, safety glasses, bonnet, frequent hand-washing , frequent hand antiseptic	asked whether the patient had symptoms, such as fever, cough, or shortness of breath, measured the patient’s fever, applied a rubber dam, ,, used a strong saliva absorber during the procedure, avoided aerosols and processes that would create droplets, preferring to use hand tools instead of an aerator, cavitron, or micromotor, postponed appointments of potentially infected patients for at least 1…	Yes	Yes	Yes	No	periodontology	Yes	No
2	Male	No	I don’t know	I don’t know	Yes	Websites or social media accounts of professional organizations, such as the Ministry of Health, Dental Association, and WHO, Published scientific articles, Television and radio programs	gloves, mask, Use of cologne, wet wipes, and hand disinfectant , not entering public areas , not having physical contact (handshaking, kissing, etc.)	mask, gloves, face protective shield, bonnet, frequent hand antiseptic	asked whether the patient had symptoms, such as fever, cough, or shortness of breath, measured the patient’s fever, applied a rubber dam, rinsed the mouth with a mouthwash containing chlorhexidin, postponed appointments of potentially infected patients for at least 14 days	Yes	Yes	Yes	Undecided	endodontics	Yes	No
1	Male	No	No	Yes	No	Websites or social media accounts of professional organizations, such as the Ministry of Health, Dental Association, and WHO, From information meetings held in institutions, Social media accounts, like Instagram, Facebook, and Twitter, Television and radio programs, Communication groups, such as Whatsapp or Line.	Use of cologne, wet wipes, and hand disinfectant , not entering public areas , not having physical contact (handshaking, kissing, etc.) , frequent ventilation of the environment	None	None	Undecided	Yes	Yes	No	oral and maxillofacial surgery	Undecided	No
1	Female	No	No	No	No	Websites or social media accounts of professional organizations, such as the Ministry of Health, Dental Association, and WHO, Published scientific articles, Television and radio programs	gloves, mask, frequent hand-washing , Use of cologne, wet wipes, and hand disinfectant , not entering public areas , not having physical contact (handshaking, kissing, etc.) , frequent ventilation of the environment , changing clothes upon arrival home	mask, FFP3/N95 mask, gloves, frequent hand-washing , frequent hand antiseptic	asked whether the patient had symptoms, such as fever, cough, or shortness of breath, avoided aerosols and processes that would create droplets, preferring to use hand tools instead of an aerator, cavitron, or micromotor, postponed appointments of potentially infected patients for at least 14 days	Yes	Yes	Yes	Yes	oral and maxillofacial surgery	Yes	No
2	Female	No	No	I don’t know	No	Television and radio programs	frequent hand-washing , Use of cologne, wet wipes, and hand disinfectant , not entering public areas , frequent ventilation of the environment	None	measured the patient’s fever, None	Yes	Yes	Yes	No	endodontics	Yes	No
2	Male	No	No	No	No	Websites or social media accounts of professional organizations, such as the Ministry of Health, Dental Association, and WHO, From information meetings held in institutions, Published scientific articles	gloves, mask, frequent hand-washing , Use of cologne, wet wipes, and hand disinfectant , not entering public areas , not having physical contact (handshaking, kissing, etc.) , frequent ventilation of the environment , changing clothes upon arrival home ,taking a shower upon arrival home	mask, gloves, safety glasses, face protective shield, bonnet, frequent hand-washing , frequent hand antiseptic	asked whether the patient had symptoms, such as fever, cough, or shortness of breath, measured the patient’s fever, applied a rubber dam, rinsed the mouth with a mouthwash containing chlorhexidin, avoided aerosols and processes that would create droplets	Yes	Yes	Yes	No	prosthesis	Yes	Yes
5	Female	No	No	No	No	Physicians’ individual websites or social media accounts	frequent hand-washing , Use of cologne, wet wipes, and hand disinfectant , not having physical contact (handshaking, kissing, etc.) , frequent ventilation of the environment , changing clothes upon arrival home	mask, gloves, safety glasses, face protective shield, frequent hand-washing	asked whether the patient had symptoms, such as fever, cough, or shortness of breath, avoided aerosols and processes that would create droplets, postponed appointments of potentially infected patients for at least 14 days	Yes	Yes	Yes	Yes	prosthesis	Yes	No
2	Female	No	No	No	Yes	Websites or social media accounts of professional organizations, such as the Ministry of Health, Dental Association, and WHO, Published scientific articles, Physicians’ individual websites or social media accounts	gloves, mask, frequent hand-washing , Use of cologne, wet wipes, and hand disinfectant , not entering public areas , not having physical contact (handshaking, kissing, etc.) , frequent ventilation of the environment , changing clothes upon arrival home ,taking a shower upon arrival home , Kendi ailem başta olmak üzere akrabalarımı da bilgilendirip evde karantina uygulama	mask, FFP3/N95 mask, gloves, safety glasses, face protective shield, bonnet, Tek kullanımlık box önlüğü, frequent hand-washing , frequent hand antiseptic	asked whether the patient had symptoms, such as fever, cough, or shortness of breath, measured the patient’s fever, applied a rubber dam, rinsed the mouth with a mouthwash containing chlorhexidin, used a strong saliva absorber during the procedure, avoided aerosols and processes that would create droplets, preferring to use hand tools instead of an aerator, cavitron, or micromotor, postponed appo…	Yes	Yes	Yes	No	periodontology	Yes	No
1	Female	Yes	No	I don’t know	No	Websites or social media accounts of professional organizations, such as the Ministry of Health, Dental Association, and WHO, Published scientific articles, Physicians’ individual websites or social media accounts, Television and radio programs	gloves, mask, frequent hand-washing , Use of cologne, wet wipes, and hand disinfectant , not entering public areas , not having physical contact (handshaking, kissing, etc.) , frequent ventilation of the environment , changing clothes upon arrival home ,taking a shower upon arrival home	mask, FFP3/N95 mask, gloves, safety glasses, face protective shield, bonnet, Tek kullanımlık box önlüğü, frequent hand-washing , frequent hand antiseptic	asked whether the patient had symptoms, such as fever, cough, or shortness of breath, measured the patient’s fever, rinsed the mouth with a mouthwash containing chlorhexidin, used a strong saliva absorber during the procedure, avoided aerosols and processes that would create droplets, preferring to use hand tools instead of an aerator, cavitron, or micromotor, postponed appointments of potentiall…	Yes	Yes	Yes	Yes	endodontics	Yes	No
1	Male	No	No	I don’t know	No	Websites or social media accounts of professional organizations, such as the Ministry of Health, Dental Association, and WHO, Social media accounts, like Instagram, Facebook, and Twitter, Television and radio programs, Communication groups, such as Whatsapp or Line.	frequent hand-washing , not entering public areas , not having physical contact (handshaking, kissing, etc.) , frequent ventilation of the environment , changing clothes upon arrival home ,taking a shower upon arrival home	1. Sınıfım staj yapmıyoruz	1.sınıfım hasta bakmıyorum	Undecided	Undecided	Undecided	No	endodontics	Yes	No
2	Male	No	No	I don’t know	Yes	Websites or social media accounts of professional organizations, such as the Ministry of Health, Dental Association, and WHO, From information meetings held in institutions, Published scientific articles, Television and radio programs	mask, frequent hand-washing , Use of cologne, wet wipes, and hand disinfectant , not entering public areas , not having physical contact (handshaking, kissing, etc.) , changing clothes upon arrival home	mask, FFP3/N95 mask, gloves, safety glasses, bonnet, frequent hand-washing , frequent hand antiseptic	asked whether the patient had symptoms, such as fever, cough, or shortness of breath, measured the patient’s fever, applied a rubber dam, rinsed the mouth with a mouthwash containing chlorhexidin, ,, ,, used a strong saliva absorber during the procedure, ,, avoided aerosols and processes that would create droplets, preferring to use hand tools instead of an aerator, cavitron, or micromotor, postp…	Yes	Yes	Yes	Yes	endodontics	Yes	No
2	Female	No	No	No	Yes	Websites or social media accounts of professional organizations, such as the Ministry of Health, Dental Association, and WHO, From information meetings held in institutions, Published scientific articles, Physicians’ individual websites or social media accounts	mask, frequent hand-washing , Use of cologne, wet wipes, and hand disinfectant , not entering public areas , not having physical contact (handshaking, kissing, etc.) , frequent ventilation of the environment , changing clothes upon arrival home	mask, gloves, safety glasses, face protective shield, bonnet, frequent hand-washing , frequent hand antiseptic	asked whether the patient had symptoms, such as fever, cough, or shortness of breath, measured the patient’s fever, applied a rubber dam, ,, avoided aerosols and processes that would create droplets, postponed appointments of potentially infected patients for at least 14 days	Yes	Yes	Yes	Yes	restorative dentistry	Yes	No
3	Male	No	No	I don’t know	No	Websites or social media accounts of professional organizations, such as the Ministry of Health, Dental Association, and WHO, Physicians’ individual websites or social media accounts, Social media accounts, like Instagram, Facebook, and Twitter, Television and radio programs, Communication groups, such as Whatsapp or Line.	frequent hand-washing , not entering public areas , not having physical contact (handshaking, kissing, etc.)	mask, gloves, bonnet, frequent hand-washing , frequent hand antiseptic	asked whether the patient had symptoms, such as fever, cough, or shortness of breath, measured the patient’s fever, rinsed the mouth with a mouthwash containing chlorhexidin, postponed appointments of potentially infected patients for at least 14 days	No	Yes	Yes	No	prosthesis	Yes	No
1	Male	No	No	I don’t know	No	From information meetings held in institutions, Social media accounts, like Instagram, Facebook, and Twitter, Television and radio programs	frequent hand-washing , Use of cologne, wet wipes, and hand disinfectant , not entering public areas , not having physical contact (handshaking, kissing, etc.)	mask, gloves	preferring to use hand tools instead of an aerator, cavitron, or micromotor	Yes	Yes	Yes	No	endodontics	Yes	No
2	Female	No	No	No	No	Social media accounts, like Instagram, Facebook, and Twitter	mask, frequent hand-washing , Use of cologne, wet wipes, and hand disinfectant , not entering public areas , changing clothes upon arrival home	Stajımız yok.	Henüz hasta tedavi etmiyorum	Yes	Yes	Yes	Yes	prosthesis	Yes	No
1	Male	Yes	I don’t know	I don’t know	No	Websites or social media accounts of professional organizations, such as the Ministry of Health, Dental Association, and WHO	frequent hand-washing , Use of cologne, wet wipes, and hand disinfectant , not entering public areas , not having physical contact (handshaking, kissing, etc.) , frequent ventilation of the environment , changing clothes upon arrival home ,taking a shower upon arrival home	safety glasses, face protective shield, Tek kullanımlık box önlüğü, frequent hand-washing , frequent hand antiseptic	None	No	No	Yes	No	prosthesis	Yes	No
1	Female	No	No	Yes	No	Websites or social media accounts of professional organizations, such as the Ministry of Health, Dental Association, and WHO, From information meetings held in institutions, Physicians’ individual websites or social media accounts, Television and radio programs	frequent hand-washing , Use of cologne, wet wipes, and hand disinfectant , not entering public areas , frequent ventilation of the environment , Ekstra yaptığım bişey yok	FFP3/N95 mask, gloves, safety glasses, Tek kullanımlık box önlüğü, frequent hand antiseptic	None	Undecided	No	No	No	pedodontics	Yes	No
2	Female	No	I don’t know	I don’t know	Yes	Websites or social media accounts of professional organizations, such as the Ministry of Health, Dental Association, and WHO, Physicians’ individual websites or social media accounts, Social media accounts, like Instagram, Facebook, and Twitter, Television and radio programs	frequent hand-washing , Use of cologne, wet wipes, and hand disinfectant , not entering public areas , not having physical contact (handshaking, kissing, etc.) , frequent ventilation of the environment , changing clothes upon arrival home	mask, FFP3/N95 mask, gloves, safety glasses, face protective shield, bonnet, Tek kullanımlık box önlüğü, frequent hand-washing , frequent hand antiseptic	asked whether the patient had symptoms, such as fever, cough, or shortness of breath, measured the patient’s fever, applied a rubber dam, rinsed the mouth with a mouthwash containing chlorhexidin, ,, ,, used a strong saliva absorber during the procedure, ,, avoided aerosols and processes that would create droplets, postponed appointments of potentially infected patients for at least 14 days	Yes	Yes	Yes	Yes	endodontics	Yes	No
2	Female	No	No	I don’t know	Yes	Television and radio programs	gloves, mask, frequent hand-washing , Use of cologne, wet wipes, and hand disinfectant , not entering public areas , frequent ventilation of the environment	mask, bonnet, frequent hand-washing	postponed appointments of potentially infected patients for at least 14 days	Yes	Yes	Yes	Yes	oral and maxillofacial surgery	Yes	No
2	Female	No	I don’t know	I don’t know	No	Television and radio programs	frequent hand-washing , Use of cologne, wet wipes, and hand disinfectant , not entering public areas , not having physical contact (handshaking, kissing, etc.) , frequent ventilation of the environment , changing clothes upon arrival home	Şu anda staj görmüyorum	Staj görmüyorum	Undecided	Undecided	Yes	Undecided	endodontics	Yes	No
1	Female	No	No	No	No	Websites or social media accounts of professional organizations, such as the Ministry of Health, Dental Association, and WHO, Physicians’ individual websites or social media accounts, Social media accounts, like Instagram, Facebook, and Twitter, Television and radio programs, Communication groups, such as Whatsapp or Line.	gloves, mask, frequent hand-washing , Use of cologne, wet wipes, and hand disinfectant , not entering public areas , not having physical contact (handshaking, kissing, etc.) , frequent ventilation of the environment	None	asked whether the patient had symptoms, such as fever, cough, or shortness of breath, measured the patient’s fever, rinsed the mouth with a mouthwash containing chlorhexidin, ,, ,, used a strong saliva absorber during the procedure, avoided aerosols and processes that would create droplets, postponed appointments of potentially infected patients for at least 14 days	Undecided	Yes	Yes	Undecided	endodontics	Yes	No
2	Female	No	No	No	No	Websites or social media accounts of professional organizations, such as the Ministry of Health, Dental Association, and WHO, Published scientific articles, Physicians’ individual websites or social media accounts, Social media accounts, like Instagram, Facebook, and Twitter	frequent hand-washing , Use of cologne, wet wipes, and hand disinfectant , not entering public areas , not having physical contact (handshaking, kissing, etc.) , frequent ventilation of the environment , changing clothes upon arrival home	mask, gloves, frequent hand-washing	asked whether the patient had symptoms, such as fever, cough, or shortness of breath, applied a rubber dam, postponed appointments of potentially infected patients for at least 14 days	Yes	Yes	Yes	Undecided	periodontology	Yes	Undecided
1	Female	No	No	No	No	Websites or social media accounts of professional organizations, such as the Ministry of Health, Dental Association, and WHO, Physicians’ individual websites or social media accounts, Social media accounts, like Instagram, Facebook, and Twitter, Television and radio programs, Communication groups, such as Whatsapp or Line.	gloves, mask, frequent hand-washing , Use of cologne, wet wipes, and hand disinfectant , not entering public areas , not having physical contact (handshaking, kissing, etc.) , frequent ventilation of the environment	mask, gloves, Tek kullanımlık box önlüğü, frequent hand-washing , frequent hand antiseptic	asked whether the patient had symptoms, such as fever, cough, or shortness of breath, measured the patient’s fever, rinsed the mouth with a mouthwash containing chlorhexidin, ,, used a strong saliva absorber during the procedure, avoided aerosols and processes that would create droplets, postponed appointments of potentially infected patients for at least 14 days	Undecided	Yes	Yes	Undecided	endodontics	Yes	No
2	Male	No	I don’t know	No	No	Websites or social media accounts of professional organizations, such as the Ministry of Health, Dental Association, and WHO, Physicians’ individual websites or social media accounts, Social media accounts, like Instagram, Facebook, and Twitter, Television and radio programs, Communication groups, such as Whatsapp or Line.	frequent hand-washing , Use of cologne, wet wipes, and hand disinfectant , not entering public areas , not having physical contact (handshaking, kissing, etc.)	None	asked whether the patient had symptoms, such as fever, cough, or shortness of breath, measured the patient’s fever, applied a rubber dam, rinsed the mouth with a mouthwash containing chlorhexidin, ,, ,, used a strong saliva absorber during the procedure, ,, avoided aerosols and processes that would create droplets, preferring to use hand tools instead of an aerator, cavitron, or micromotor, postp…	Yes	Yes	Yes	No	oral and maxillofacial surgery	Yes	No
1	Male	No	I don’t know	No	Yes	Social media accounts, like Instagram, Facebook, and Twitter	frequent hand-washing	mask	asked whether the patient had symptoms, such as fever, cough, or shortness of breath	Yes	Yes	Yes	Yes	endodontics	Yes	Undecided
1	Male	No	No	I don’t know	No	Websites or social media accounts of professional organizations, such as the Ministry of Health, Dental Association, and WHO	frequent hand-washing , not entering public areas , not having physical contact (handshaking, kissing, etc.) , frequent ventilation of the environment , changing clothes upon arrival home	mask, gloves, frequent hand-washing , frequent hand antiseptic	asked whether the patient had symptoms, such as fever, cough, or shortness of breath	Yes	Yes	Yes	No	oral and maxillofacial surgery	Yes	No
2	Female	No	No	No	No	Websites or social media accounts of professional organizations, such as the Ministry of Health, Dental Association, and WHO, From information meetings held in institutions, Published scientific articles, Physicians’ individual websites or social media accounts, Television and radio programs	frequent hand-washing , Use of cologne, wet wipes, and hand disinfectant , not entering public areas , not having physical contact (handshaking, kissing, etc.) , frequent ventilation of the environment , changing clothes upon arrival home ,taking a shower upon arrival home	Staj yapmıyoruz	Hasta bakmıyorum henüz😢	Yes	Yes	Yes	Undecided	endodontics	Yes	No
1	Male	No	No	No	No	Published scientific articles, Physicians’ individual websites or social media accounts, Social media accounts, like Instagram, Facebook, and Twitter, Television and radio programs, Communication groups, such as Whatsapp or Line.	frequent hand-washing , Use of cologne, wet wipes, and hand disinfectant , not entering public areas , not having physical contact (handshaking, kissing, etc.) , frequent ventilation of the environment , changing clothes upon arrival home	Staj yok	Staj yok	No	No	Yes	Yes	periodontology	Yes	No
1	Female	Yes	I don’t know	No	No	Websites or social media accounts of professional organizations, such as the Ministry of Health, Dental Association, and WHO	gloves, mask, frequent hand-washing , Use of cologne, wet wipes, and hand disinfectant , not entering public areas , not having physical contact (handshaking, kissing, etc.) , frequent ventilation of the environment , changing clothes upon arrival home	mask, gloves, frequent hand-washing , frequent hand antiseptic	None	Yes	Yes	Yes	Undecided	oral and maxillofacial surgery	Yes	No
1	Male	No	No	I don’t know	No	Websites or social media accounts of professional organizations, such as the Ministry of Health, Dental Association, and WHO	not entering public areas , not having physical contact (handshaking, kissing, etc.)	None	None	No	No	Yes	No	oral and maxillofacial surgery	Yes	No
1	Male	No	No	Yes	No	Television and radio programs	frequent hand-washing , Use of cologne, wet wipes, and hand disinfectant , not entering public areas , not having physical contact (handshaking, kissing, etc.) , Evden çıkmamak	None	None	No	No	No	Yes	endodontics	No	No
1	Female	Yes	No	No	No	Websites or social media accounts of professional organizations, such as the Ministry of Health, Dental Association, and WHO, Physicians’ individual websites or social media accounts, Social media accounts, like Instagram, Facebook, and Twitter, Television and radio programs, Communication groups, such as Whatsapp or Line.	frequent hand-washing , Use of cologne, wet wipes, and hand disinfectant , not entering public areas , not having physical contact (handshaking, kissing, etc.) , frequent ventilation of the environment , changing clothes upon arrival home ,taking a shower upon arrival home	None	None	Undecided	No	No	Undecided	prosthesis	Undecided	No
1	Male	Yes	No	No	No	Social media accounts, like Instagram, Facebook, and Twitter, Television and radio programs, Communication groups, such as Whatsapp or Line.	frequent hand-washing , Use of cologne, wet wipes, and hand disinfectant , not entering public areas , not having physical contact (handshaking, kissing, etc.) , frequent ventilation of the environment	mask, FFP3/N95 mask, gloves, safety glasses, face protective shield, bonnet, Tek kullanımlık box önlüğü, frequent hand-washing , frequent hand antiseptic	asked whether the patient had symptoms, such as fever, cough, or shortness of breath, measured the patient’s fever, rinsed the mouth with a mouthwash containing chlorhexidin, ,, ,, used a strong saliva absorber during the procedure, ,, avoided aerosols and processes that would create droplets, preferring to use hand tools instead of an aerator, cavitron, or micromotor, postponed appointments of p…	Yes	Yes	Yes	Undecided	oral and maxillofacial surgery	Yes	No
5	Male	No	No	No	No	Physicians’ individual websites or social media accounts, Social media accounts, like Instagram, Facebook, and Twitter, Television and radio programs, Communication groups, such as Whatsapp or Line.	frequent hand-washing , not entering public areas , not having physical contact (handshaking, kissing, etc.) , changing clothes upon arrival home	mask, gloves, face protective shield	None	Yes	Yes	Yes	Yes	endodontics	Undecided	Yes
1	Female	Yes	I don’t know	I don’t know	No	Websites or social media accounts of professional organizations, such as the Ministry of Health, Dental Association, and WHO, Published scientific articles, Physicians’ individual websites or social media accounts, Social media accounts, like Instagram, Facebook, and Twitter, Television and radio programs, Communication groups, such as Whatsapp or Line.	frequent hand-washing , Use of cologne, wet wipes, and hand disinfectant , not entering public areas , not having physical contact (handshaking, kissing, etc.) , frequent ventilation of the environment , changing clothes upon arrival home	None	Hasta bakmıyorum	Yes	Yes	Yes	Undecided	oral and maxillofacial surgery	Yes	Yes
3	Male	No	No	No	No	Websites or social media accounts of professional organizations, such as the Ministry of Health, Dental Association, and WHO, Social media accounts, like Instagram, Facebook, and Twitter, Television and radio programs	frequent hand-washing , not entering public areas , not having physical contact (handshaking, kissing, etc.) , frequent ventilation of the environment	mask, frequent hand-washing , frequent hand antiseptic	asked whether the patient had symptoms, such as fever, cough, or shortness of breath, measured the patient’s fever, avoided aerosols and processes that would create droplets, preferring to use hand tools instead of an aerator, cavitron, or micromotor, postponed appointments of potentially infected patients for at least 14 days	Yes	Yes	Yes	Yes	prosthesis	Yes	No
2	Female	No	No	I don’t know	No	Staj yapmıyorum	Staj yapmıyorum	Staj yapmıyorum	Staj yapmıyorum	No	No	No	No	endodontics	Yes	No
1	Male	Yes	I don’t know	No	No	Websites or social media accounts of professional organizations, such as the Ministry of Health, Dental Association, and WHO, Social media accounts, like Instagram, Facebook, and Twitter, Television and radio programs	frequent hand-washing , Use of cologne, wet wipes, and hand disinfectant , not entering public areas , not having physical contact (handshaking, kissing, etc.)	frequent hand-washing , None	None	Undecided	Yes	Yes	No	oral and maxillofacial surgery	Yes	No
1	Male	Yes	I don’t know	No	No	Websites or social media accounts of professional organizations, such as the Ministry of Health, Dental Association, and WHO, Social media accounts, like Instagram, Facebook, and Twitter, Television and radio programs	frequent hand-washing , Use of cologne, wet wipes, and hand disinfectant , not entering public areas , not having physical contact (handshaking, kissing, etc.)	frequent hand-washing , None	None	Undecided	Yes	Yes	No	oral and maxillofacial surgery	Yes	No
1	Male	No	No	No	Yes	Websites or social media accounts of professional organizations, such as the Ministry of Health, Dental Association, and WHO, From information meetings held in institutions, Published scientific articles, Physicians’ individual websites or social media accounts, Social media accounts, like Instagram, Facebook, and Twitter, Television and radio programs, Communication groups, such as Whatsapp or L…	gloves, mask, frequent hand-washing , Use of cologne, wet wipes, and hand disinfectant , not entering public areas , not having physical contact (handshaking, kissing, etc.) , frequent ventilation of the environment , changing clothes upon arrival home ,taking a shower upon arrival home	mask, gloves, safety glasses, frequent hand-washing , frequent hand antiseptic	Diş tedavisi uygulamıyorum.	No	No	Yes	No	oral and maxillofacial surgery	Yes	No
1	Female	Yes	No	No	No	Websites or social media accounts of professional organizations, such as the Ministry of Health, Dental Association, and WHO, Social media accounts, like Instagram, Facebook, and Twitter	gloves, mask, frequent hand-washing , Use of cologne, wet wipes, and hand disinfectant , not entering public areas , not having physical contact (handshaking, kissing, etc.) , frequent ventilation of the environment , changing clothes upon arrival home	mask, FFP3/N95 mask, gloves, safety glasses, face protective shield, bonnet, Tek kullanımlık box önlüğü, frequent hand-washing	asked whether the patient had symptoms, such as fever, cough, or shortness of breath, measured the patient’s fever, postponed appointments of potentially infected patients for at least 14 days	Yes	Yes	Yes	No	oral and maxillofacial surgery	Yes	No
1	Male	No	No	Yes	No	Websites or social media accounts of professional organizations, such as the Ministry of Health, Dental Association, and WHO, Published scientific articles	gloves, mask, frequent hand-washing , not entering public areas	None	None	Yes	Yes	Yes	No	oral and maxillofacial surgery	Undecided	No
3	Male	No	No	No	No	Websites or social media accounts of professional organizations, such as the Ministry of Health, Dental Association, and WHO, Social media accounts, like Instagram, Facebook, and Twitter, Television and radio programs	frequent hand-washing , not entering public areas , not having physical contact (handshaking, kissing, etc.) , frequent ventilation of the environment	mask, frequent hand-washing , frequent hand antiseptic	asked whether the patient had symptoms, such as fever, cough, or shortness of breath, measured the patient’s fever, avoided aerosols and processes that would create droplets, preferring to use hand tools instead of an aerator, cavitron, or micromotor, postponed appointments of potentially infected patients for at least 14 days	Yes	Yes	Yes	Yes	prosthesis	Yes	No
1	Male	No	No	No	No	Bilgi edinmedim	frequent hand-washing , Use of cologne, wet wipes, and hand disinfectant , not entering public areas	None	None	No	Undecided	Undecided	Undecided	oral and maxillofacial surgery	Undecided	Undecided
2	Male	No	No	I don’t know	No	Websites or social media accounts of professional organizations, such as the Ministry of Health, Dental Association, and WHO	gloves, mask, frequent hand-washing , Use of cologne, wet wipes, and hand disinfectant , not entering public areas , not having physical contact (handshaking, kissing, etc.) , frequent ventilation of the environment , changing clothes upon arrival home ,taking a shower upon arrival home	None	asked whether the patient had symptoms, such as fever, cough, or shortness of breath, measured the patient’s fever, avoided aerosols and processes that would create droplets, preferring to use hand tools instead of an aerator, cavitron, or micromotor, postponed appointments of potentially infected patients for at least 14 days	Yes	Yes	Yes	Yes	prosthesis	Undecided	Yes
3	Female	Yes	Yes	No	Yes	Websites or social media accounts of professional organizations, such as the Ministry of Health, Dental Association, and WHO, Physicians’ individual websites or social media accounts, Social media accounts, like Instagram, Facebook, and Twitter, Television and radio programs, Communication groups, such as Whatsapp or Line.	frequent hand-washing , Use of cologne, wet wipes, and hand disinfectant , not entering public areas , not having physical contact (handshaking, kissing, etc.) , frequent ventilation of the environment , changing clothes upon arrival home	mask, gloves, face protective shield, bonnet, frequent hand-washing , frequent hand antiseptic	asked whether the patient had symptoms, such as fever, cough, or shortness of breath, applied a rubber dam, used a strong saliva absorber during the procedure, avoided aerosols and processes that would create droplets, postponed appointments of potentially infected patients for at least 14 days	Yes	Yes	Yes	Yes	oral and maxillofacial surgery	Yes	No
1	Female	No	I don’t know	No	No	Websites or social media accounts of professional organizations, such as the Ministry of Health, Dental Association, and WHO, Social media accounts, like Instagram, Facebook, and Twitter, Television and radio programs, Communication groups, such as Whatsapp or Line.	frequent hand-washing , Use of cologne, wet wipes, and hand disinfectant , not entering public areas , not having physical contact (handshaking, kissing, etc.) , frequent ventilation of the environment , changing clothes upon arrival home	None	None	Undecided	Yes	Yes	No	oral and maxillofacial surgery	Yes	No
2	Female	No	No	No	Yes	Social media accounts, like Instagram, Facebook, and Twitter	gloves, frequent hand-washing , Use of cologne, wet wipes, and hand disinfectant , not entering public areas , not having physical contact (handshaking, kissing, etc.) , changing clothes upon arrival home	mask, gloves, safety glasses, bonnet, frequent hand-washing	asked whether the patient had symptoms, such as fever, cough, or shortness of breath, measured the patient’s fever, applied a rubber dam, used a strong saliva absorber during the procedure, avoided aerosols and processes that would create droplets	Yes	Yes	Yes	Yes	periodontology	Yes	No
2	Female	No	No	No	No	Websites or social media accounts of professional organizations, such as the Ministry of Health, Dental Association, and WHO, From information meetings held in institutions, Physicians’ individual websites or social media accounts, Social media accounts, like Instagram, Facebook, and Twitter	frequent hand-washing , Use of cologne, wet wipes, and hand disinfectant , not entering public areas , frequent ventilation of the environment , changing clothes upon arrival home ,taking a shower upon arrival home	mask, gloves, frequent hand-washing , frequent hand antiseptic	asked whether the patient had symptoms, such as fever, cough, or shortness of breath	Yes	Yes	Yes	Undecided	periodontology	Yes	Undecided
5	Male	No	No	No	No	Websites or social media accounts of professional organizations, such as the Ministry of Health, Dental Association, and WHO, Television and radio programs	mask, frequent hand-washing , Use of cologne, wet wipes, and hand disinfectant , not entering public areas , not having physical contact (handshaking, kissing, etc.) , frequent ventilation of the environment , changing clothes upon arrival home	mask, gloves, face protective shield, bonnet, frequent hand-washing , frequent hand antiseptic	asked whether the patient had symptoms, such as fever, cough, or shortness of breath, avoided aerosols and processes that would create droplets, preferring to use hand tools instead of an aerator, cavitron, or micromotor, postponed appointments of potentially infected patients for at least 14 days	Yes	Yes	Yes	No	endodontics	Yes	No
2	Male	No	No	I don’t know	No	Published scientific articles	not entering public areas	FFP3/N95 mask, gloves, safety glasses, face protective shield, bonnet	asked whether the patient had symptoms, such as fever, cough, or shortness of breath, applied a rubber dam	No	No	No	No	prosthesis	No	No
2	Male	No	No	Yes	No	Published scientific articles	frequent hand-washing , not entering public areas , not having physical contact (handshaking, kissing, etc.) , changing clothes upon arrival home ,taking a shower upon arrival home	None	None	Yes	No	Yes	Undecided	oral and maxillofacial surgery	Yes	No
2	Female	No	No	No	No	Social media accounts, like Instagram, Facebook, and Twitter, Television and radio programs, Communication groups, such as Whatsapp or Line.	frequent hand-washing , Use of cologne, wet wipes, and hand disinfectant , not entering public areas , not having physical contact (handshaking, kissing, etc.) , frequent ventilation of the environment , changing clothes upon arrival home ,taking a shower upon arrival home	mask, gloves, safety glasses, face protective shield, Tek kullanımlık box önlüğü, frequent hand-washing , frequent hand antiseptic	asked whether the patient had symptoms, such as fever, cough, or shortness of breath, measured the patient’s fever, applied a rubber dam, rinsed the mouth with a mouthwash containing chlorhexidin, ,, ,, used a strong saliva absorber during the procedure, ,, avoided aerosols and processes that would create droplets, preferring to use hand tools instead of an aerator, cavitron, or micromotor, postp…	Yes	Yes	Yes	Undecided	periodontology	Yes	No
2	Male	No	I don’t know	No	No	From information meetings held in institutions, Social media accounts, like Instagram, Facebook, and Twitter, Communication groups, such as Whatsapp or Line.	frequent hand-washing , Use of cologne, wet wipes, and hand disinfectant , not entering public areas , not having physical contact (handshaking, kissing, etc.) , frequent ventilation of the environment	None	None	No	No	Yes	No	oral and maxillofacial surgery	Undecided	No
2	Male	No	No	I don’t know	Yes	Websites or social media accounts of professional organizations, such as the Ministry of Health, Dental Association, and WHO, Television and radio programs	not entering public areas , not having physical contact (handshaking, kissing, etc.) , frequent ventilation of the environment	mask, gloves, safety glasses, face protective shield, bonnet	applied a rubber dam, rinsed the mouth with a mouthwash containing chlorhexidin, ,	Undecided	Yes	Yes	Undecided	restorative dentistry	Yes	No
2	Female	No	I don’t know	No	Yes	Websites or social media accounts of professional organizations, such as the Ministry of Health, Dental Association, and WHO, Social media accounts, like Instagram, Facebook, and Twitter, Television and radio programs, Communication groups, such as Whatsapp or Line.	frequent hand-washing , not entering public areas , not having physical contact (handshaking, kissing, etc.) , frequent ventilation of the environment , changing clothes upon arrival home	FFP3/N95 mask, gloves, frequent hand-washing	asked whether the patient had symptoms, such as fever, cough, or shortness of breath, measured the patient’s fever, postponed appointments of potentially infected patients for at least 14 days	Undecided	Yes	Yes	Undecided	oral and maxillofacial surgery	Yes	No
1	Male	Yes	No	No	No	Television and radio programs	gloves, mask, frequent hand-washing , Use of cologne, wet wipes, and hand disinfectant , not entering public areas , not having physical contact (handshaking, kissing, etc.) , frequent ventilation of the environment , changing clothes upon arrival home ,taking a shower upon arrival home	None	None, İ	Undecided	Yes	Yes	Yes	orthodontics	Yes	No
1	Female	Yes	No	I don’t know	No	Websites or social media accounts of professional organizations, such as the Ministry of Health, Dental Association, and WHO, Published scientific articles, Social media accounts, like Instagram, Facebook, and Twitter	gloves, mask, frequent hand-washing , not entering public areas , not having physical contact (handshaking, kissing, etc.) , frequent ventilation of the environment , changing clothes upon arrival home ,taking a shower upon arrival home	mask, gloves, safety glasses, face protective shield, bonnet, Tek kullanımlık box önlüğü, frequent hand-washing , frequent hand antiseptic	asked whether the patient had symptoms, such as fever, cough, or shortness of breath, measured the patient’s fever, used a strong saliva absorber during the procedure, avoided aerosols and processes that would create droplets	Yes	Yes	Yes	Yes	oral and maxillofacial surgery	Undecided	No
1	Female	Yes	No	No	No	Websites or social media accounts of professional organizations, such as the Ministry of Health, Dental Association, and WHO, Social media accounts, like Instagram, Facebook, and Twitter, Television and radio programs, Communication groups, such as Whatsapp or Line.	gloves, mask, frequent hand-washing , Use of cologne, wet wipes, and hand disinfectant , not entering public areas , not having physical contact (handshaking, kissing, etc.) , frequent ventilation of the environment , changing clothes upon arrival home ,taking a shower upon arrival home	mask, gloves, safety glasses	None	Undecided	Yes	Yes	Yes	oral and maxillofacial surgery	Yes	No
1	Female	Yes	I don’t know	Yes	Yes	Websites or social media accounts of professional organizations, such as the Ministry of Health, Dental Association, and WHO	gloves, mask, frequent hand-washing , not entering public areas , not having physical contact (handshaking, kissing, etc.) , changing clothes upon arrival home ,taking a shower upon arrival home	mask, gloves, frequent hand antiseptic	biz tedavi yapmıyoruz	Undecided	Yes	Yes	No	oral and maxillofacial surgery	Yes	No
1	Female	Yes	No	No	No	Websites or social media accounts of professional organizations, such as the Ministry of Health, Dental Association, and WHO, From information meetings held in institutions, Published scientific articles, Social media accounts, like Instagram, Facebook, and Twitter, Television and radio programs, Communication groups, such as Whatsapp or Line.	mask, frequent hand-washing , Use of cologne, wet wipes, and hand disinfectant , not entering public areas , not having physical contact (handshaking, kissing, etc.) , frequent ventilation of the environment	mask, frequent hand-washing , frequent hand antiseptic	asked whether the patient had symptoms, such as fever, cough, or shortness of breath, measured the patient’s fever, rinsed the mouth with a mouthwash containing chlorhexidin, avoided aerosols and processes that would create droplets, postponed appointments of potentially infected patients for at least 14 days	Undecided	Yes	Yes	Yes	oral and maxillofacial surgery	Yes	No
1	Female	No	No	No	Yes	From information meetings held in institutions, Published scientific articles, Television and radio programs	mask, frequent hand-washing , Use of cologne, wet wipes, and hand disinfectant , not entering public areas , not having physical contact (handshaking, kissing, etc.)	mask	asked whether the patient had symptoms, such as fever, cough, or shortness of breath	Yes	Yes	Yes	No	oral and maxillofacial surgery	Yes	No
1	Female	No	No	No	Yes	From information meetings held in institutions, Published scientific articles, Television and radio programs	mask, frequent hand-washing , Use of cologne, wet wipes, and hand disinfectant , not entering public areas , not having physical contact (handshaking, kissing, etc.)	mask	asked whether the patient had symptoms, such as fever, cough, or shortness of breath	Yes	Yes	Yes	No	oral and maxillofacial surgery	Yes	No
1	Female	No	I don’t know	Yes	No	Websites or social media accounts of professional organizations, such as the Ministry of Health, Dental Association, and WHO, From information meetings held in institutions, Physicians’ individual websites or social media accounts	frequent hand-washing , Use of cologne, wet wipes, and hand disinfectant , not entering public areas , not having physical contact (handshaking, kissing, etc.) , frequent ventilation of the environment	mask, gloves, bonnet, frequent hand-washing , frequent hand antiseptic	asked whether the patient had symptoms, such as fever, cough, or shortness of breath, measured the patient’s fever	Yes	Undecided	Yes	No	endodontics	Yes	Undecided
2	Female	No	No	I don’t know	No	Websites or social media accounts of professional organizations, such as the Ministry of Health, Dental Association, and WHO, Published scientific articles, Television and radio programs	frequent hand-washing , Use of cologne, wet wipes, and hand disinfectant , not entering public areas , not having physical contact (handshaking, kissing, etc.) , frequent ventilation of the environment , changing clothes upon arrival home	mask, gloves, safety glasses, bonnet	None	Yes	Yes	Yes	No	pedodontics	Yes	No
1	Male	No	I don’t know	I don’t know	No	Websites or social media accounts of professional organizations, such as the Ministry of Health, Dental Association, and WHO, Television and radio programs	frequent hand-washing , Use of cologne, wet wipes, and hand disinfectant , not entering public areas , not having physical contact (handshaking, kissing, etc.) , frequent ventilation of the environment	None	None	Yes	No	Yes	No	endodontics	Undecided	No
2	Male	No	No	No	No	Websites or social media accounts of professional organizations, such as the Ministry of Health, Dental Association, and WHO, From information meetings held in institutions, Covid-19 ile ilgili yayınlanmış bilimsel makalelerden, Social media accounts, like Instagram, Facebook, and Twitter, Television and radio programs, Communication groups, such as Whatsapp or Line.	frequent hand-washing , Use of cologne, wet wipes, and hand disinfectant , not entering public areas , not having physical contact (handshaking, kissing, etc.)	frequent hand-washing , frequent hand antiseptic	asked whether the patient had symptoms, such as fever, cough, or shortness of breath, measured the patient’s fever, applied a rubber dam	Undecided	Yes	Yes	Yes	restorative dentistry	Yes	No
2	Male	No	No	I don’t know	Yes	Websites or social media accounts of professional organizations, such as the Ministry of Health, Dental Association, and WHO, Television and radio programs	not entering public areas , not having physical contact (handshaking, kissing, etc.) , Bulunduğum ortamı sık sık havalandırma	mask, gloves, safety glasses, face protective shield, bonnet	applied a rubber dam, İşlem öncesi Klorhexidin içerikli bir gargara ile ağzı çalkalatıyorum, ,	Undecided	Yes	Yes	Undecided	restorative dentistry	Yes	No
